# Supplementary material
Source: Research Square preprint supplement (doi:10.21203/rs.3.rs-9350864/v1)
Supplement: Supplementary file 1 [file d88ee1b03d3097f2136f41bc.docx]

**Supporting Information**

**Solvent-hybridization strategy enables high-voltage lithium metal batteries with practical wide-temperature operational capability**

*Ying Zhang1,#, Shaoqing Liu1,#, Xiang Li1, Ting He1, Hui Wei1, Muhammad Sultan Irshad1, Qin Wang3, Zaiping Guo2,*, Jianwen Liu1,**

1 College of New Energy and Electrical Engineering & Ministry of Education Key Laboratory for Green Preparation and Application of Functional Materials, Hubei University, Wuhan 430062, P. R. China

2 Department of Materials Science and Engineering, City University of Hong Kong, Kowloon Hong Kong 999077, P. R. China

3 Hubei WanRun New Energy Technology Co., Ltd., Shiyan 442500, P. R. China

*# These authors contributed to this work equally.*

** Corresponding authors. E-mail: zaipiguo@cityu.edu.hk (Prof. & Dr. Zaiping Guo); jianwen@hubu.edu.cn (Prof. & Dr. Jianwen Liu).*


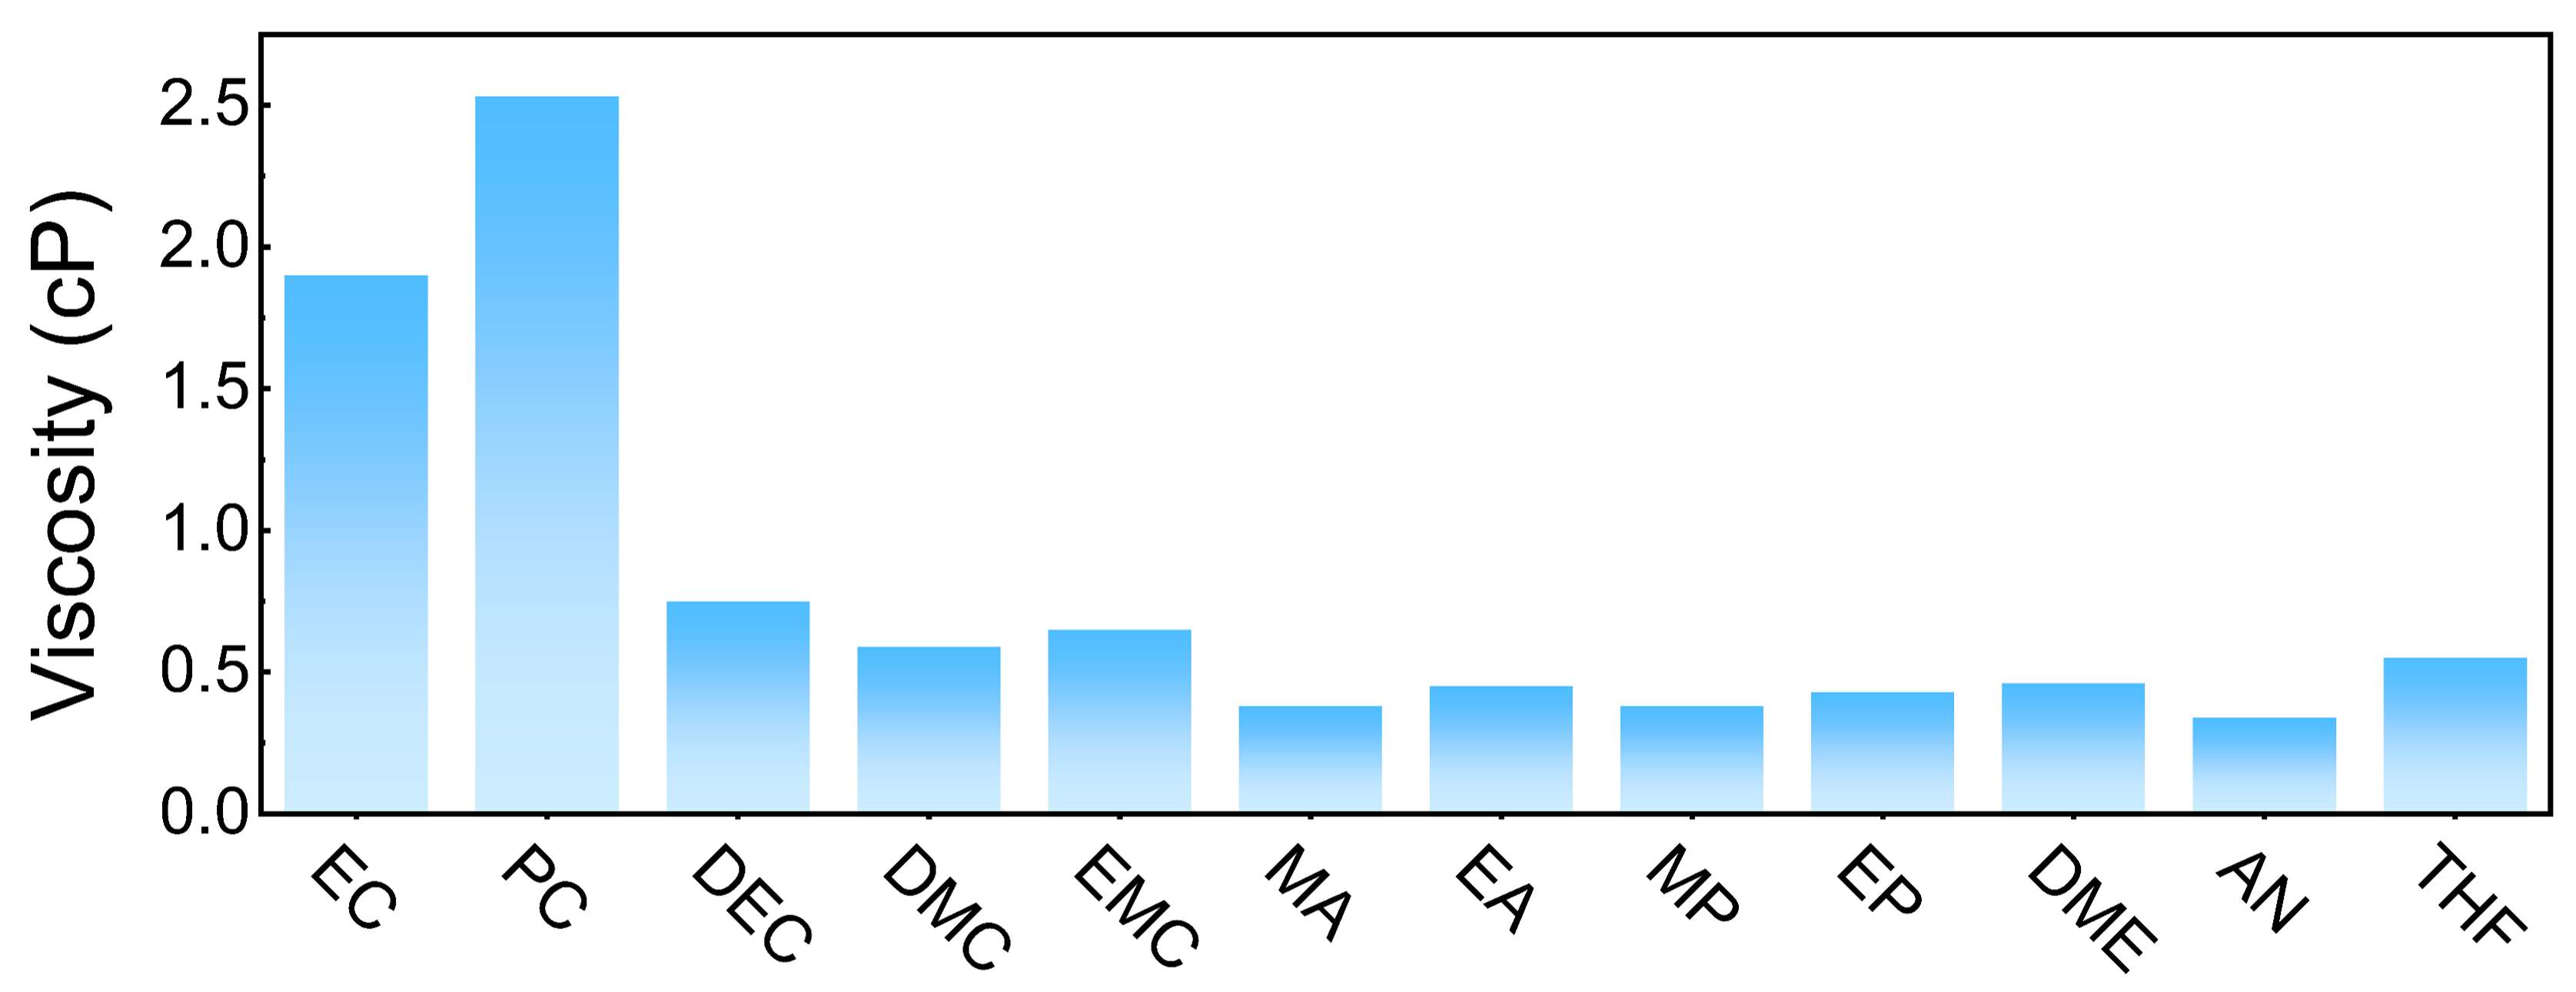


**Supplementary Fig.  1.** Viscosities of the commonly used solvents at 30 °C.


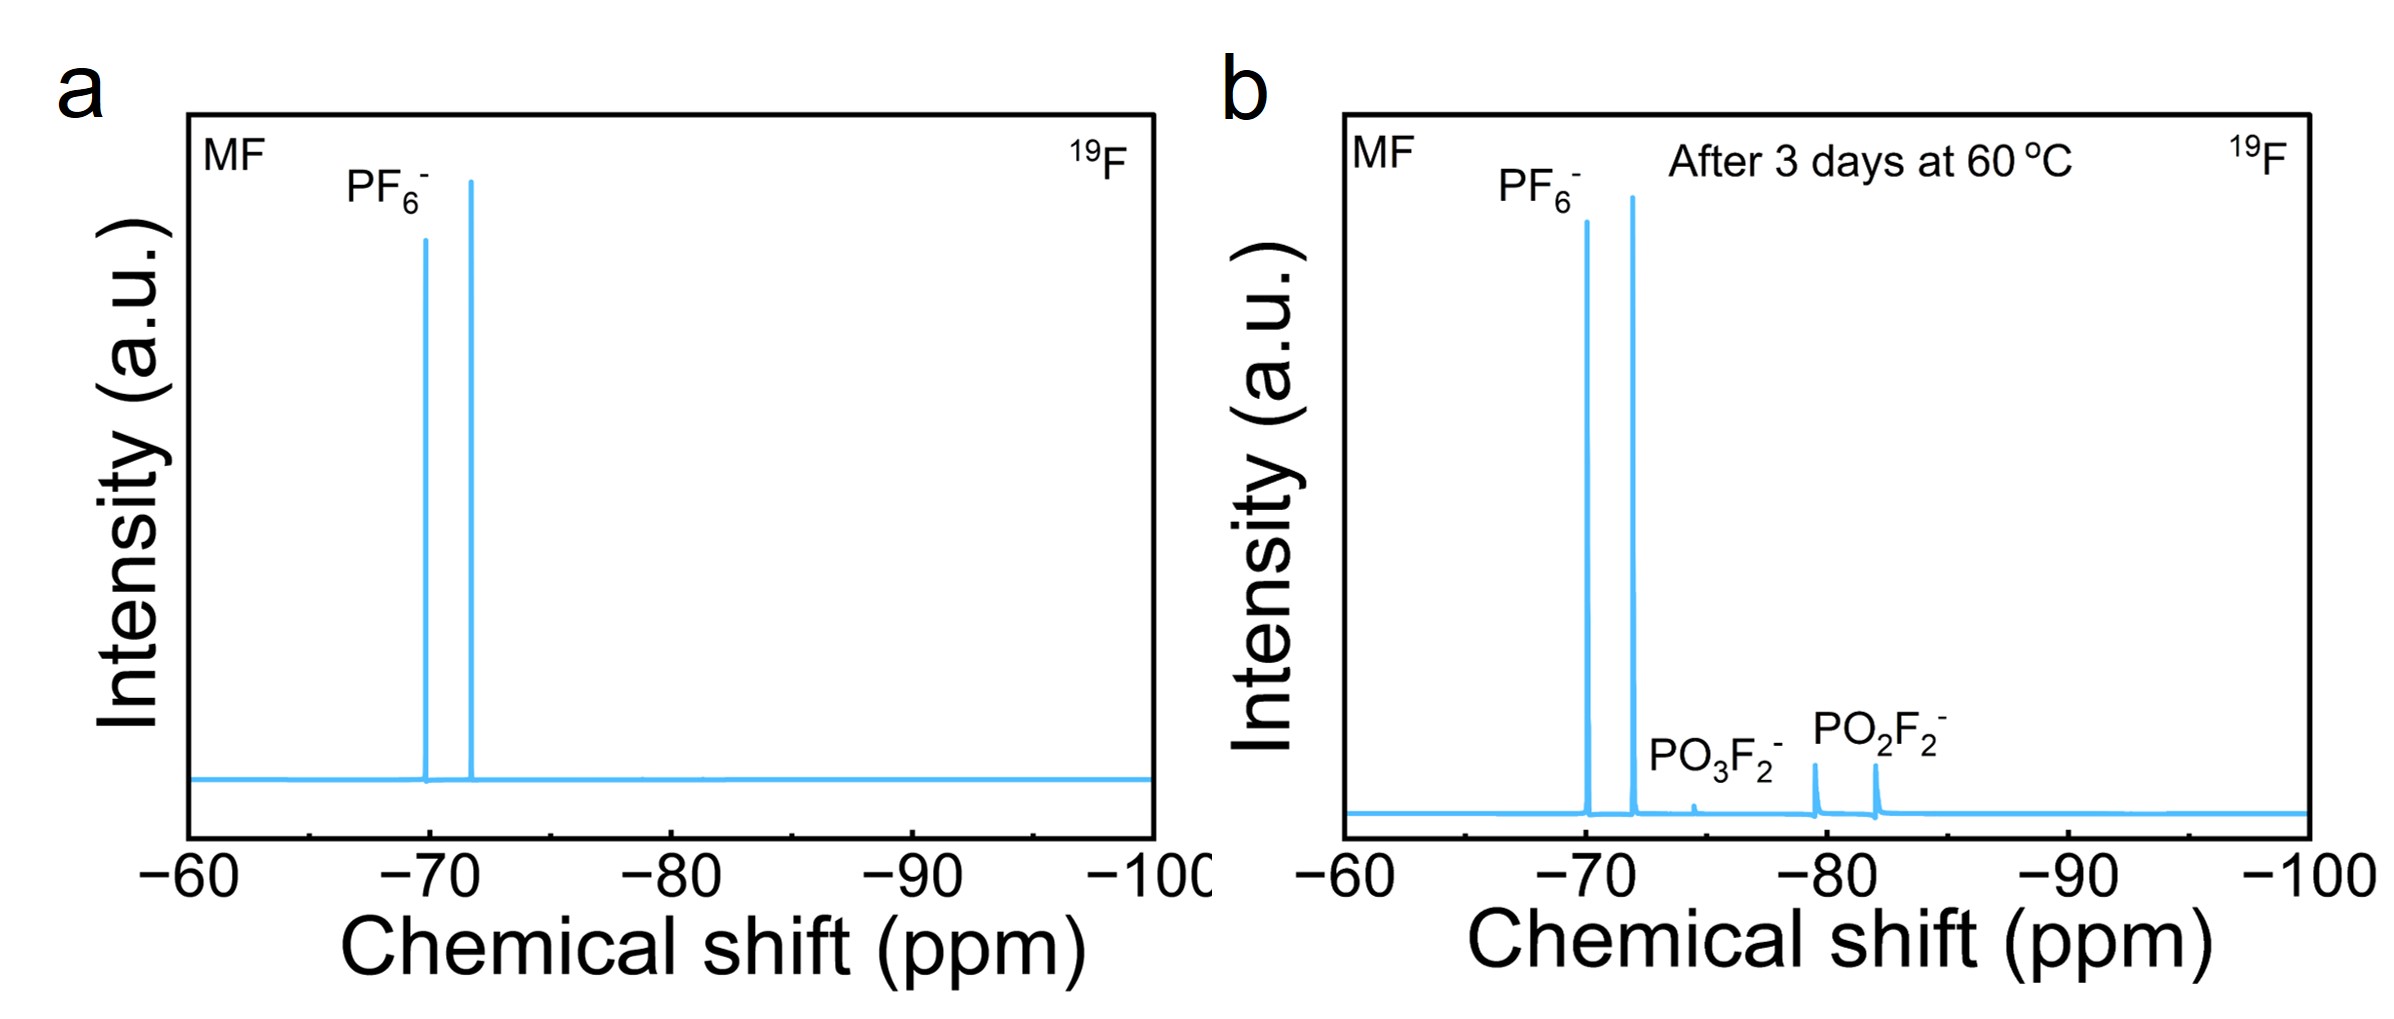


**Supplementary Fig.  2.** 19F NMR spectra of MF electrolyte at 60 °C before and after 3 days.


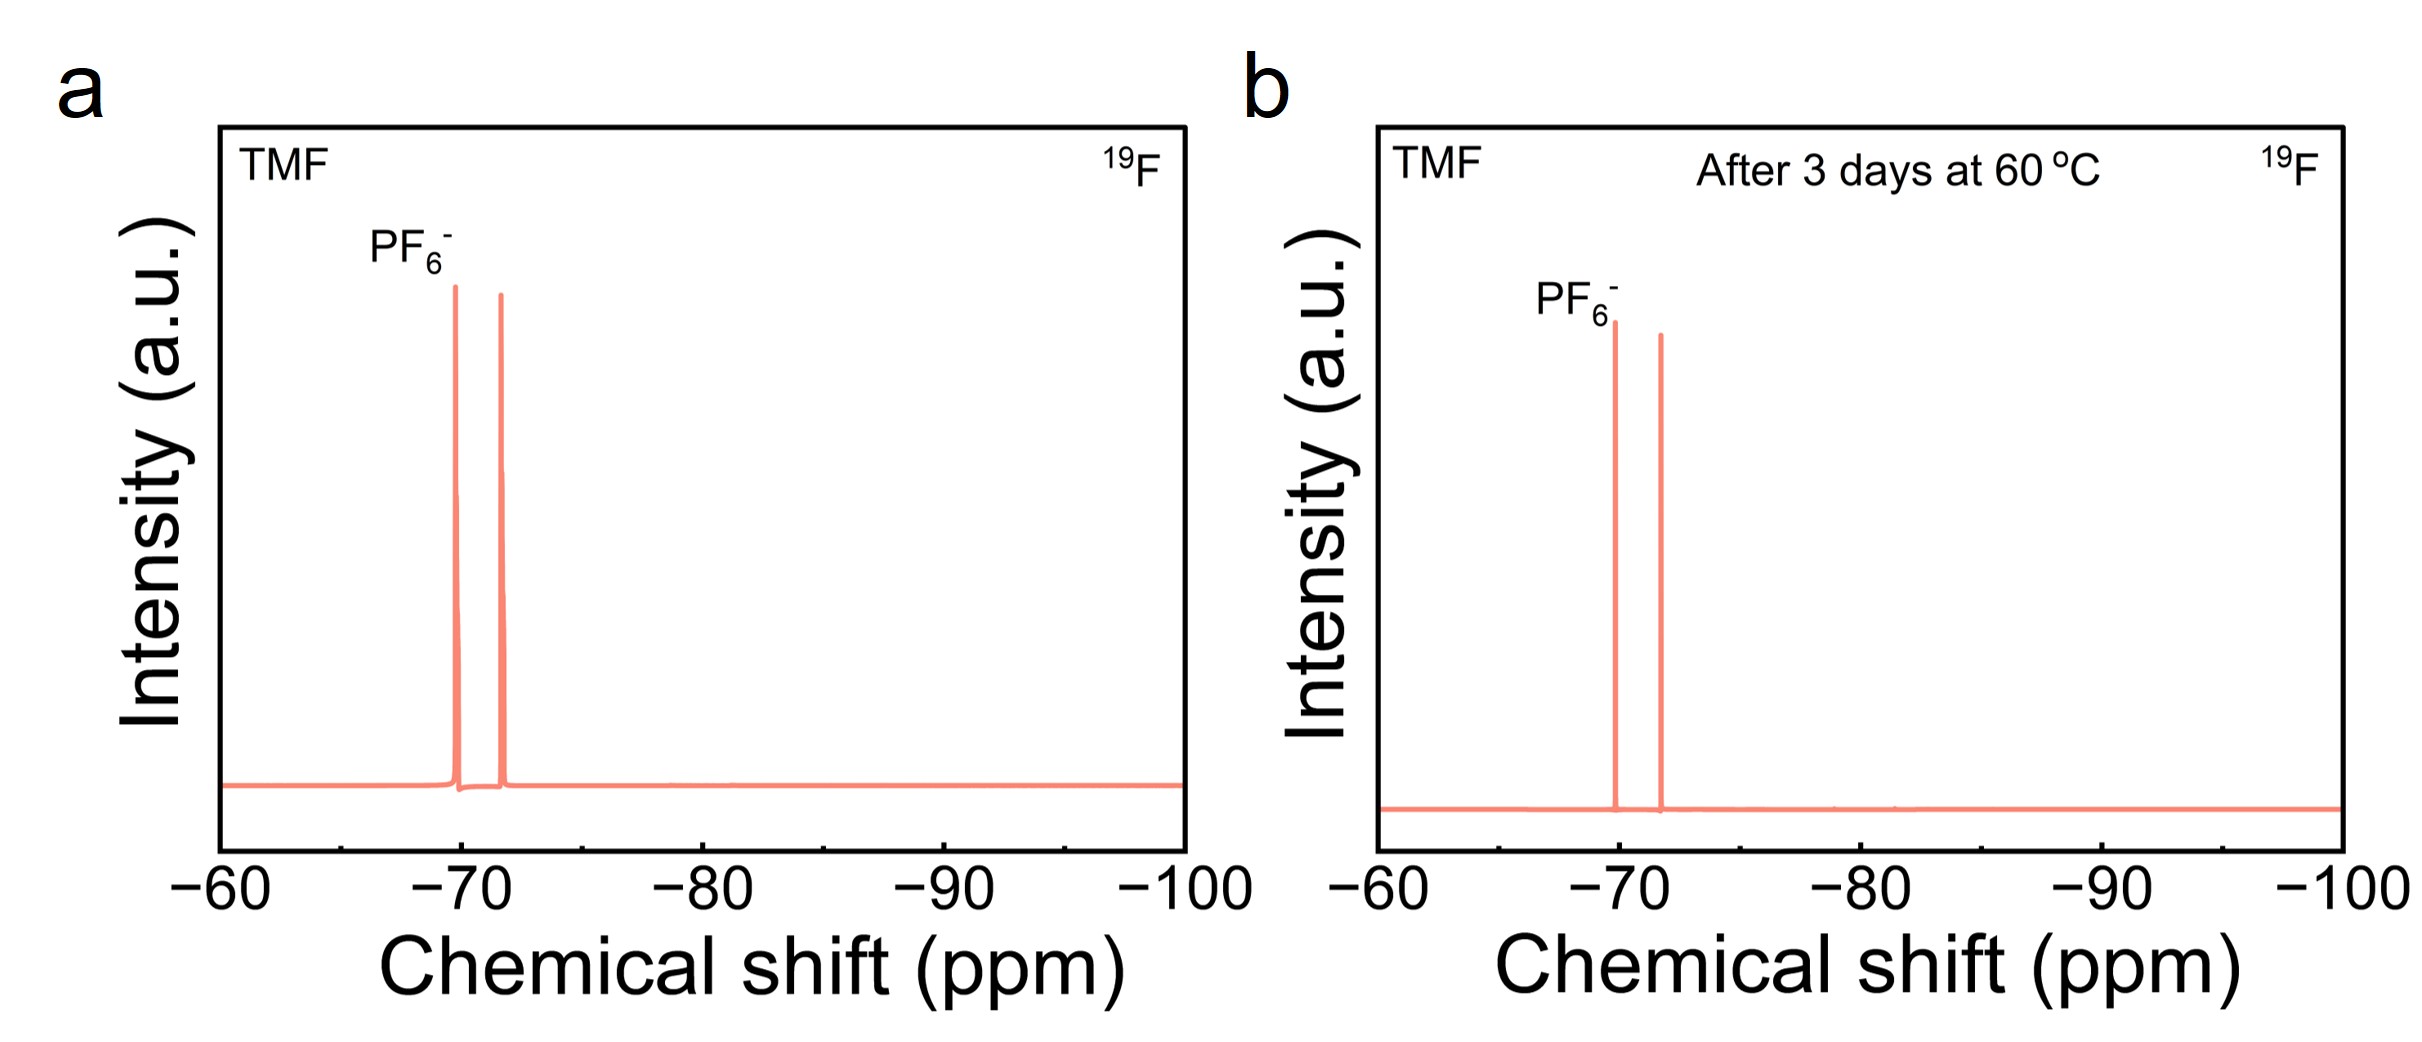


**Supplementary Fig.  3.** 19F NMR spectra of TMF electrolyte at 60 °C before and after 3 days.


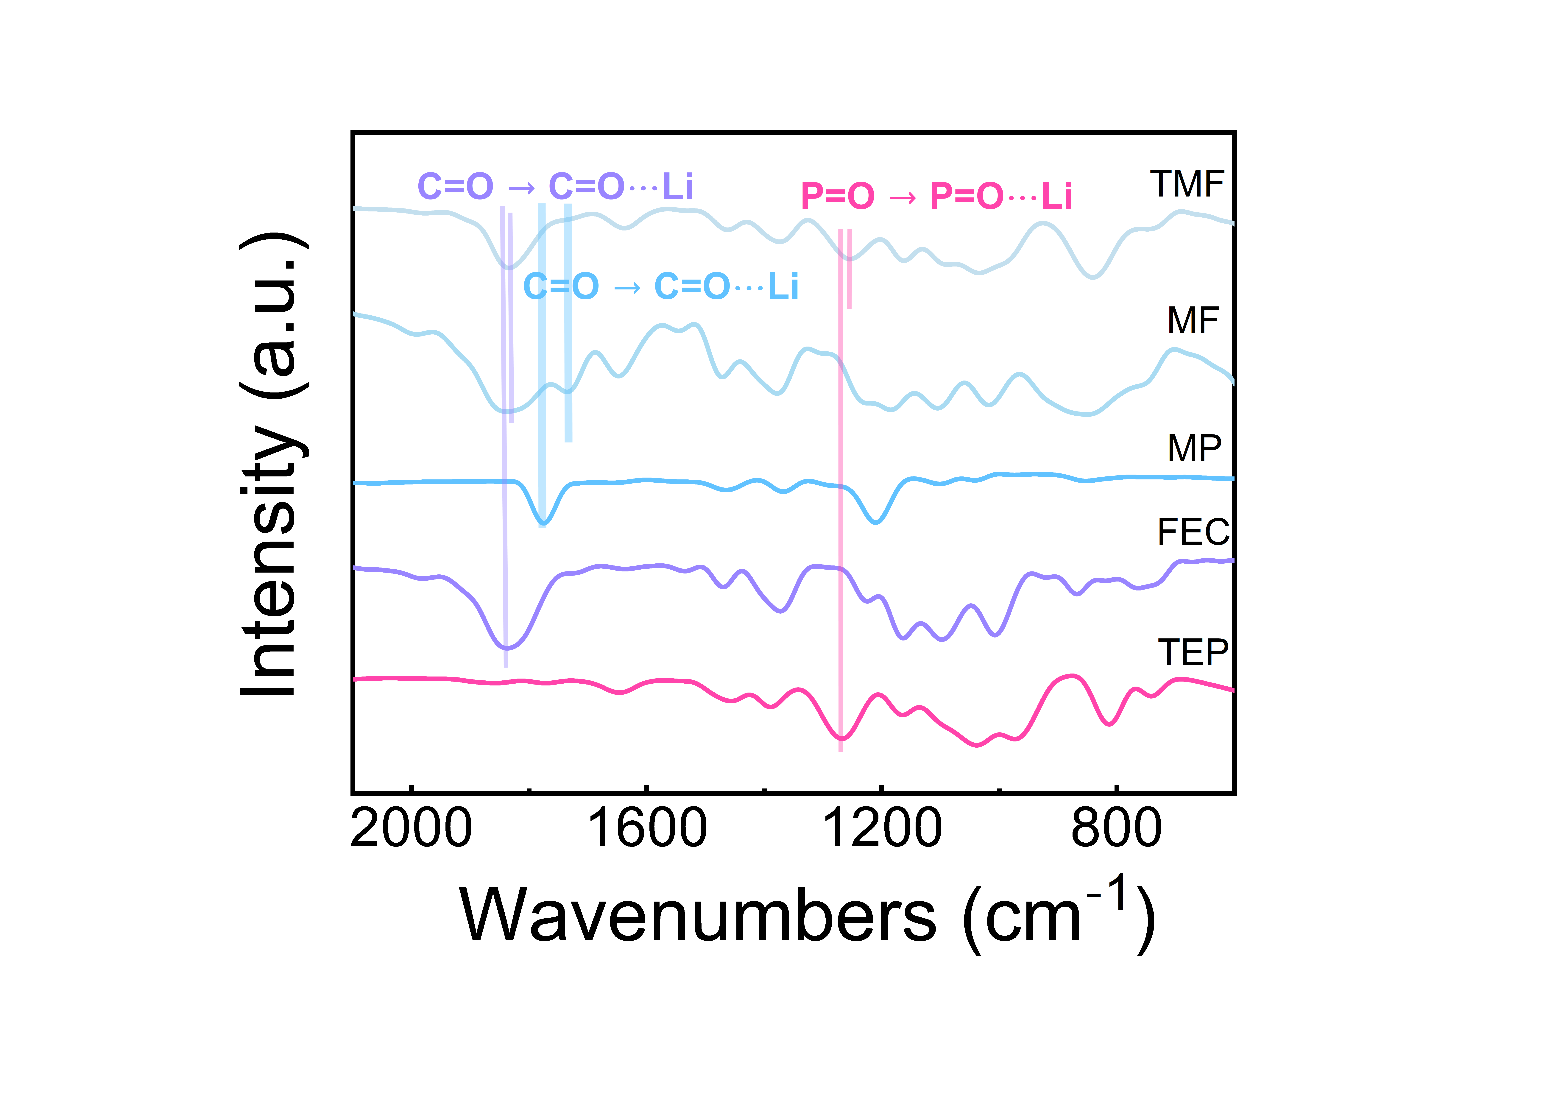


**Supplementary Fig.  4.** FTIR spectroscopies of the two electrolytes and TEP, MP, FEC solvents.


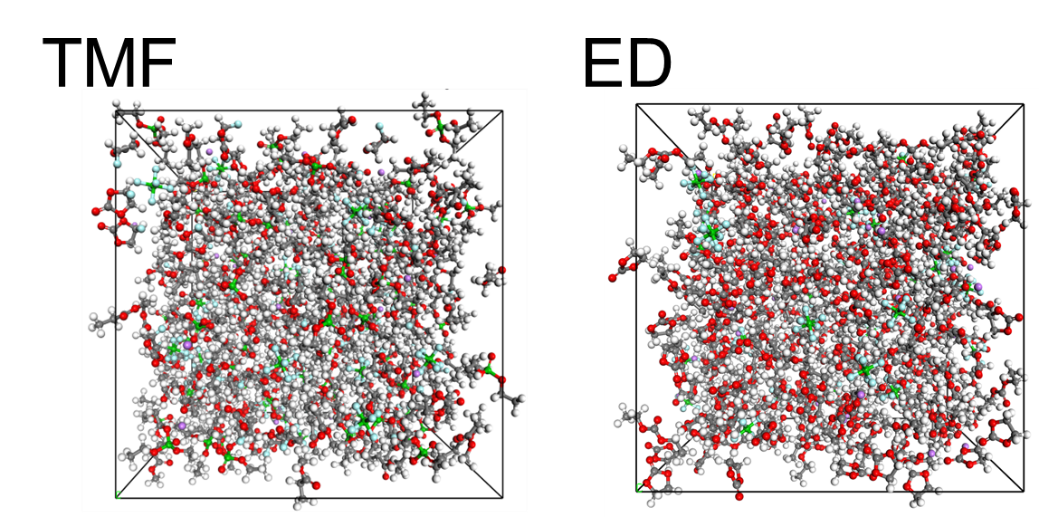


**Supplementary Fig.  5.** MD snapshots of TMF and ED.


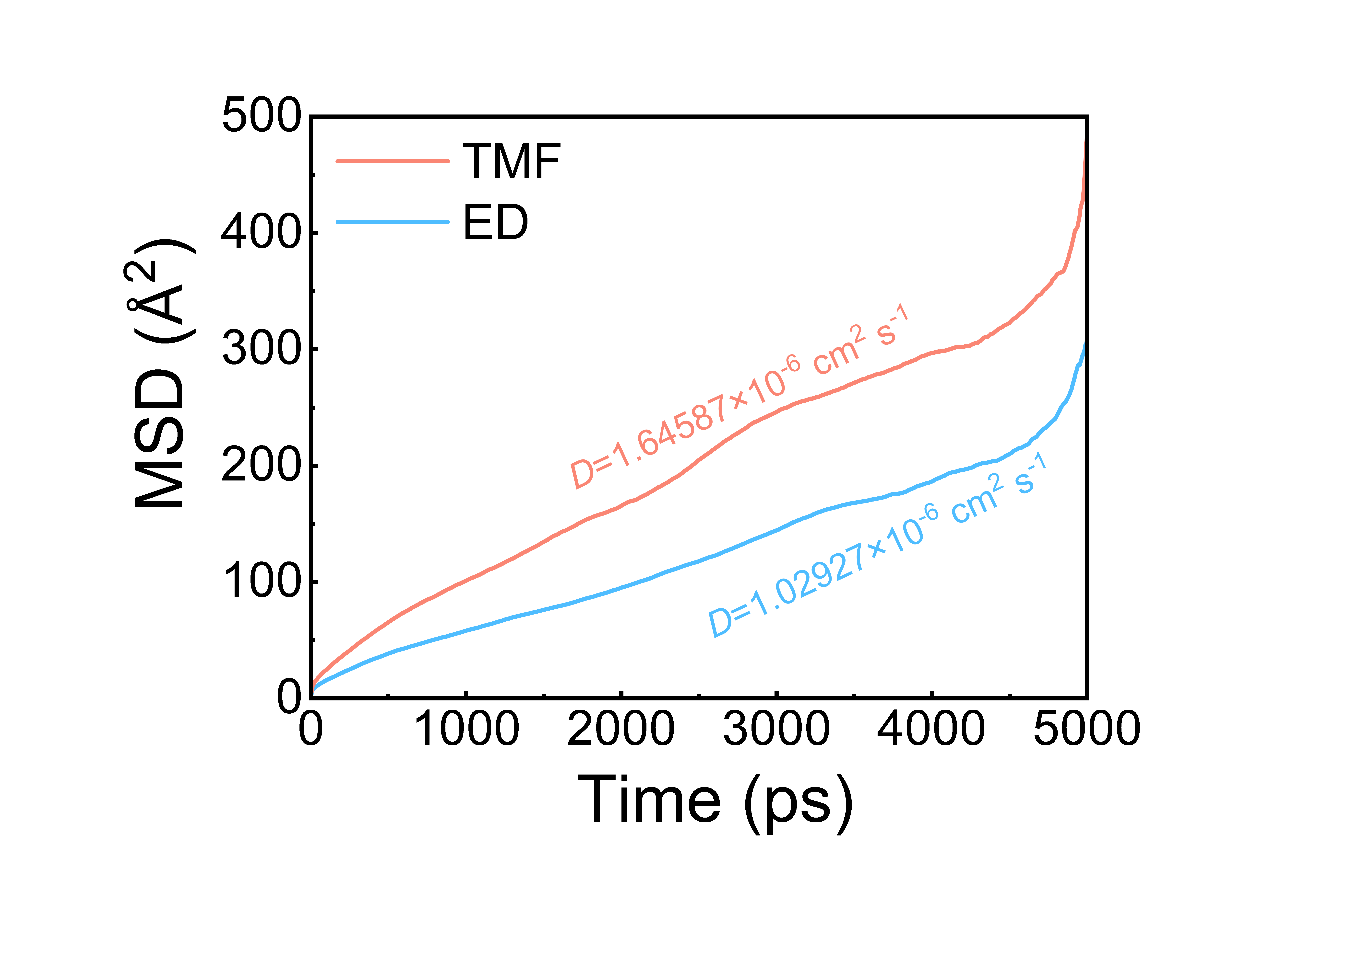


**Supplementary Fig.  6.** Mean squared displacement (MSD) curves of Li+ ions in TMF and ED.


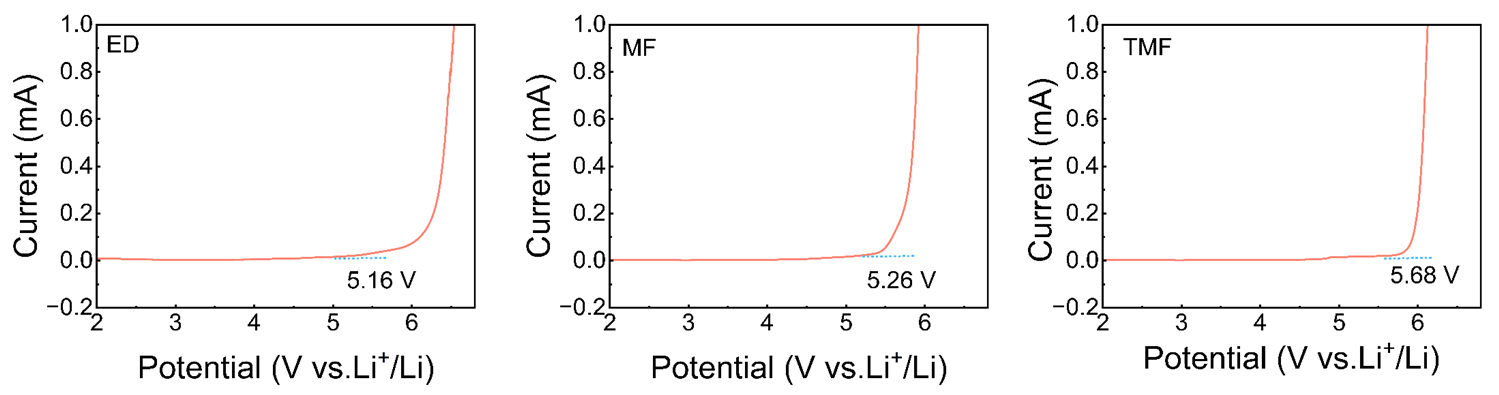


**Supplementary Fig.  7.** Electrochemical stabilization windows of different electrolytes.


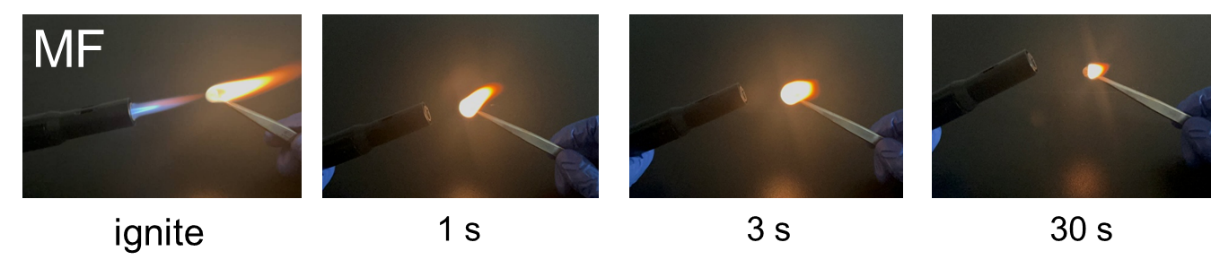


**Supplementary Fig.  8.** Ignition tests of MF electrolyte.


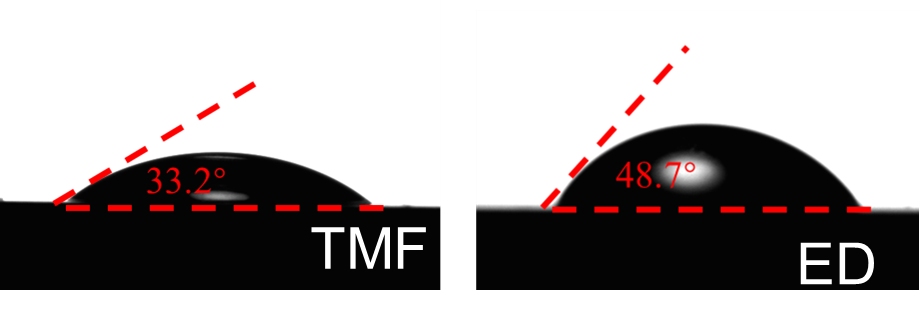


**Supplementary Fig.  9.** Contact angles of different electrolytes with diaphragm.


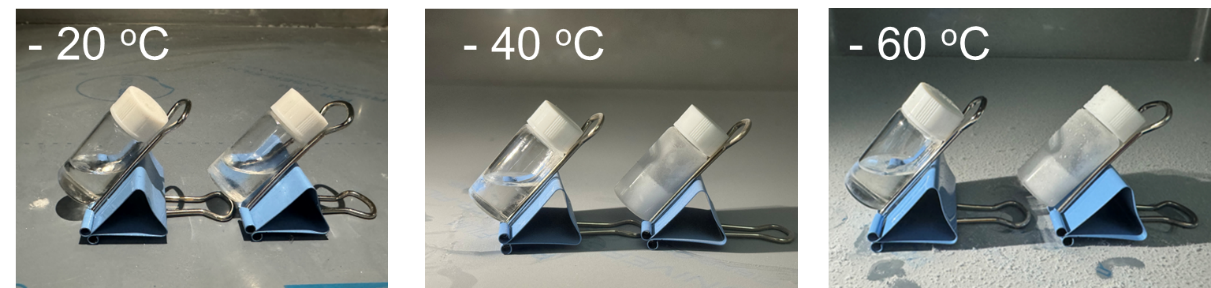


**Supplementary Fig.  10.** Optical photographs of TMF (left) and ED (right) electrolytes at varying temperatures


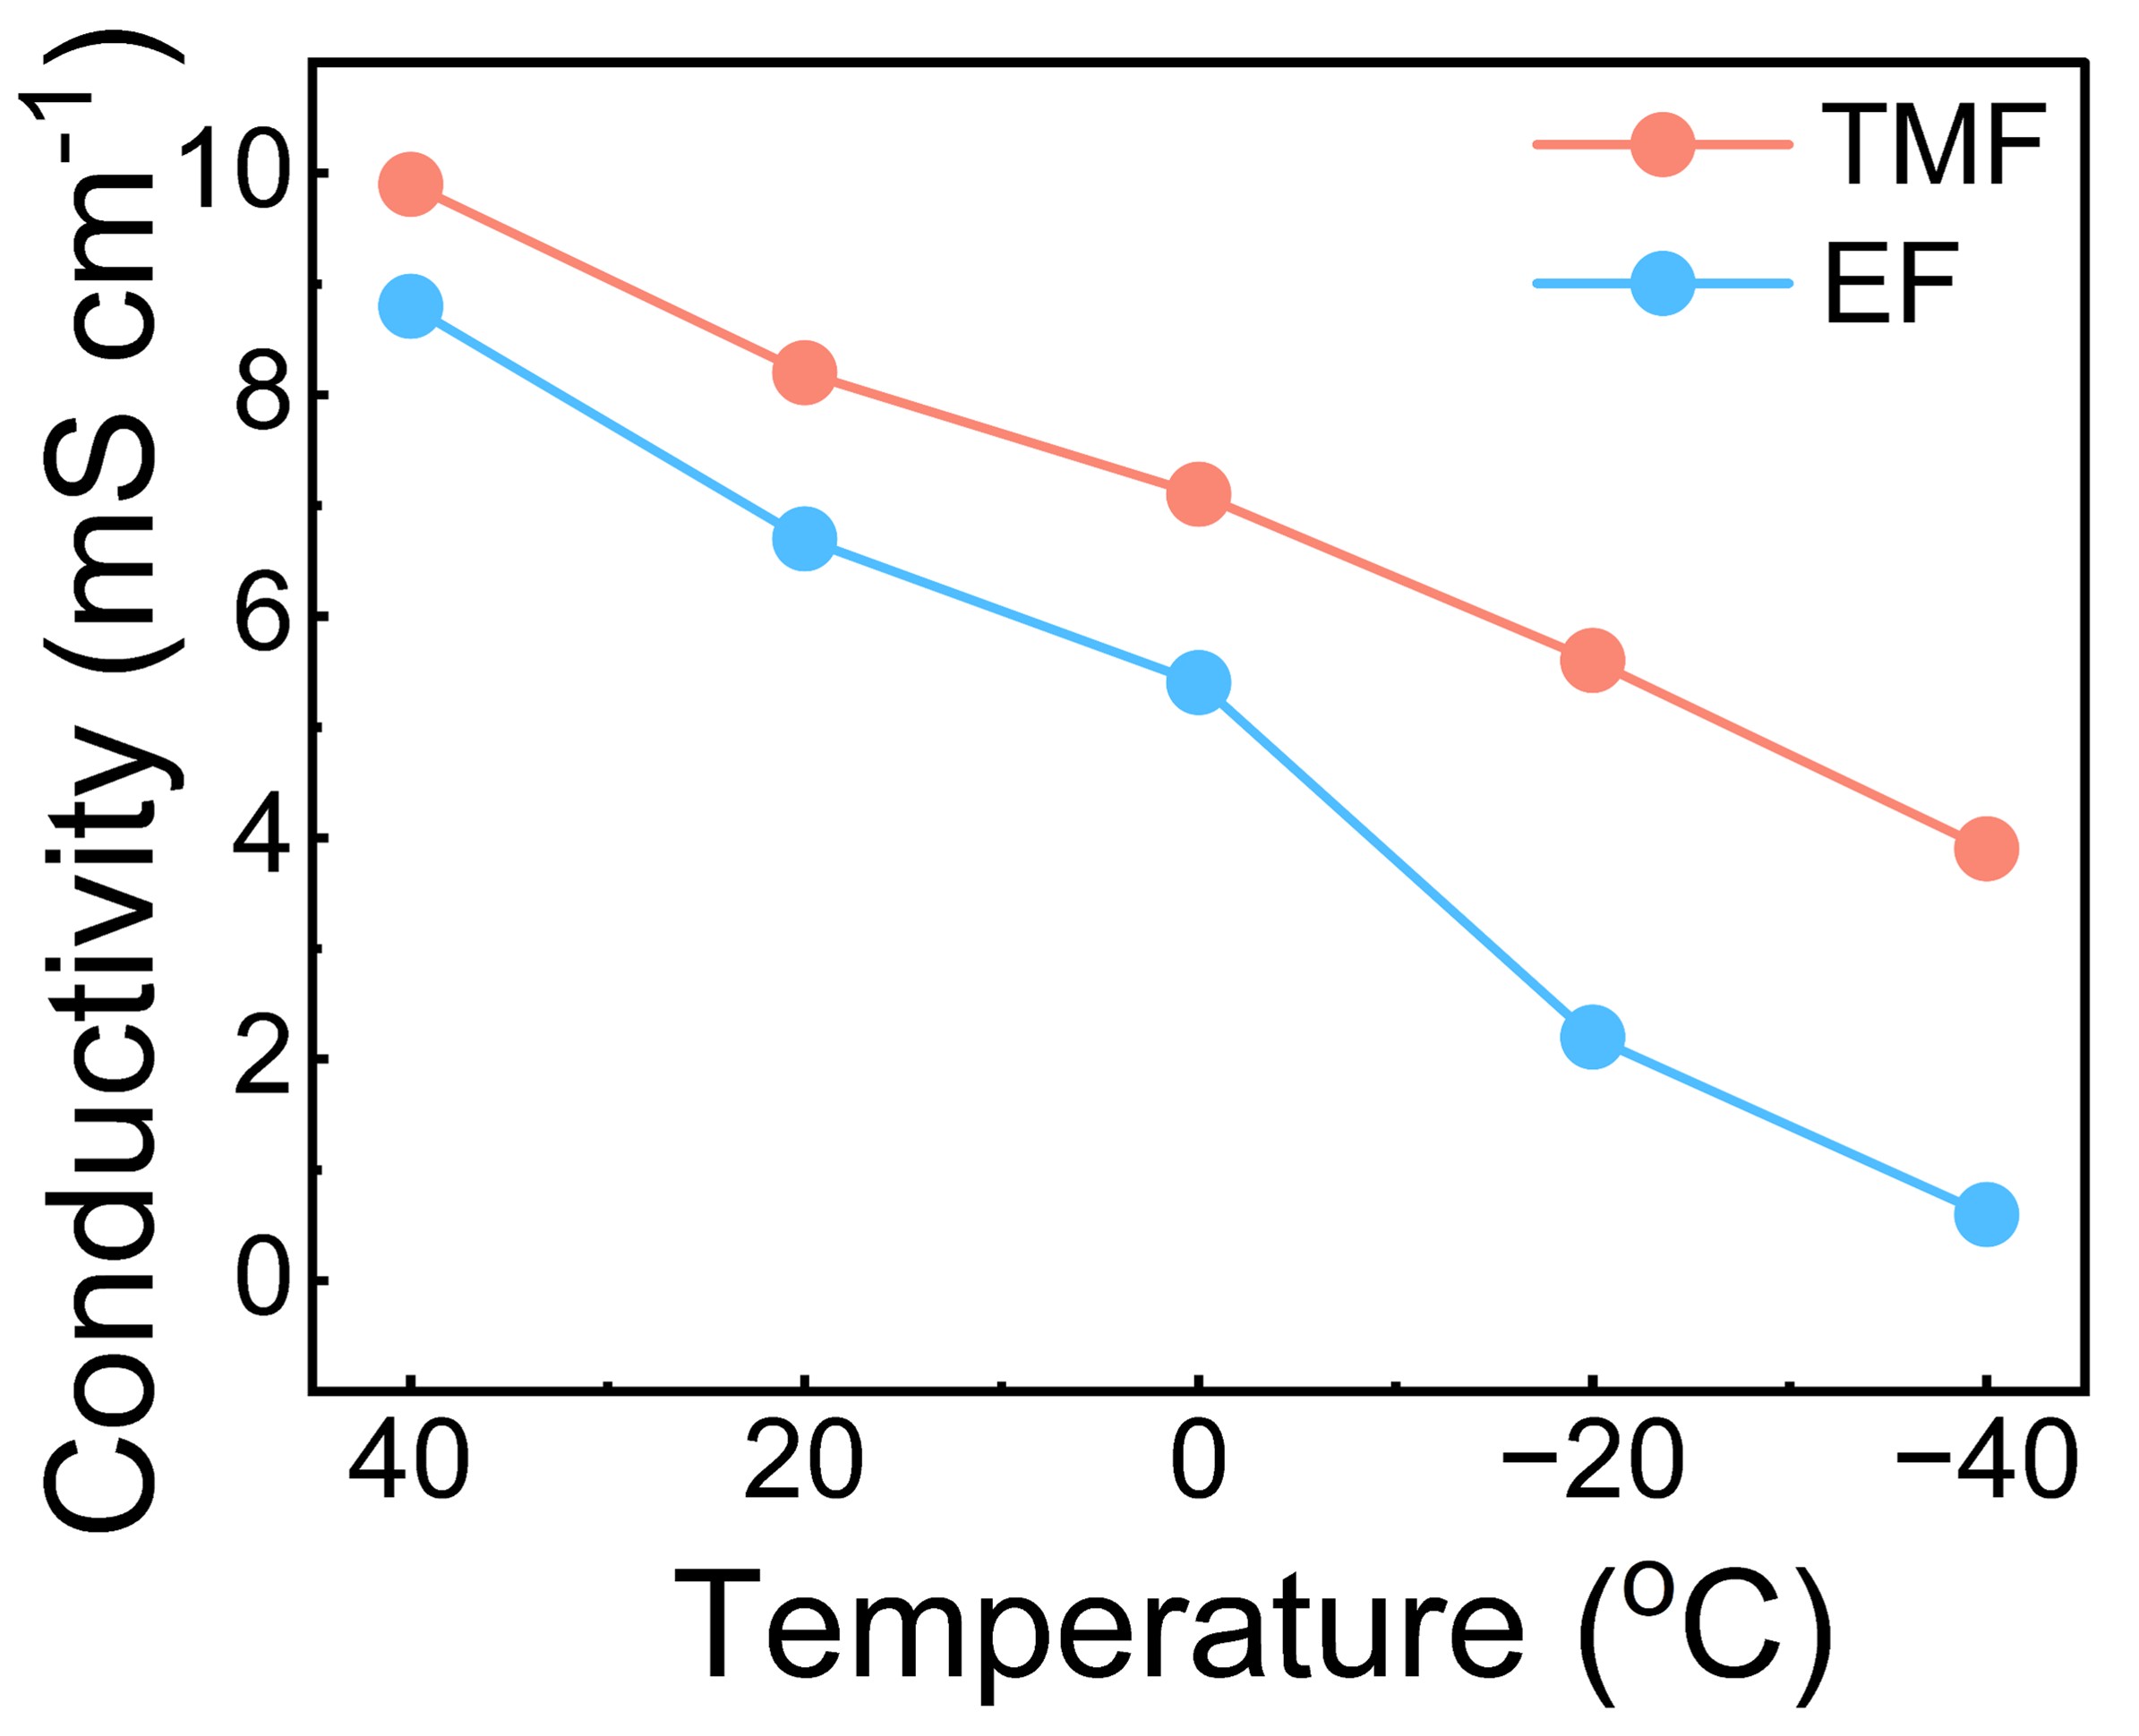


**Supplementary Fig.  11.** Ion conductivities of different electrolytes at different temperatures.


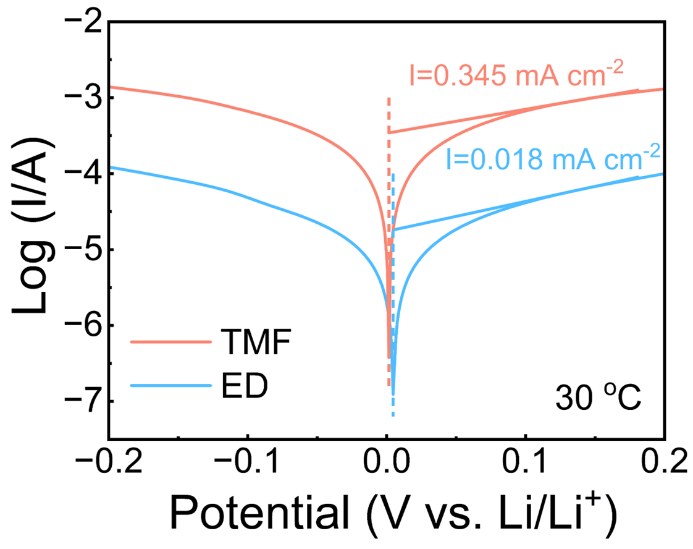


**Supplementary Fig.  12.** Tafel plots of TMF and ED at 30 °C.


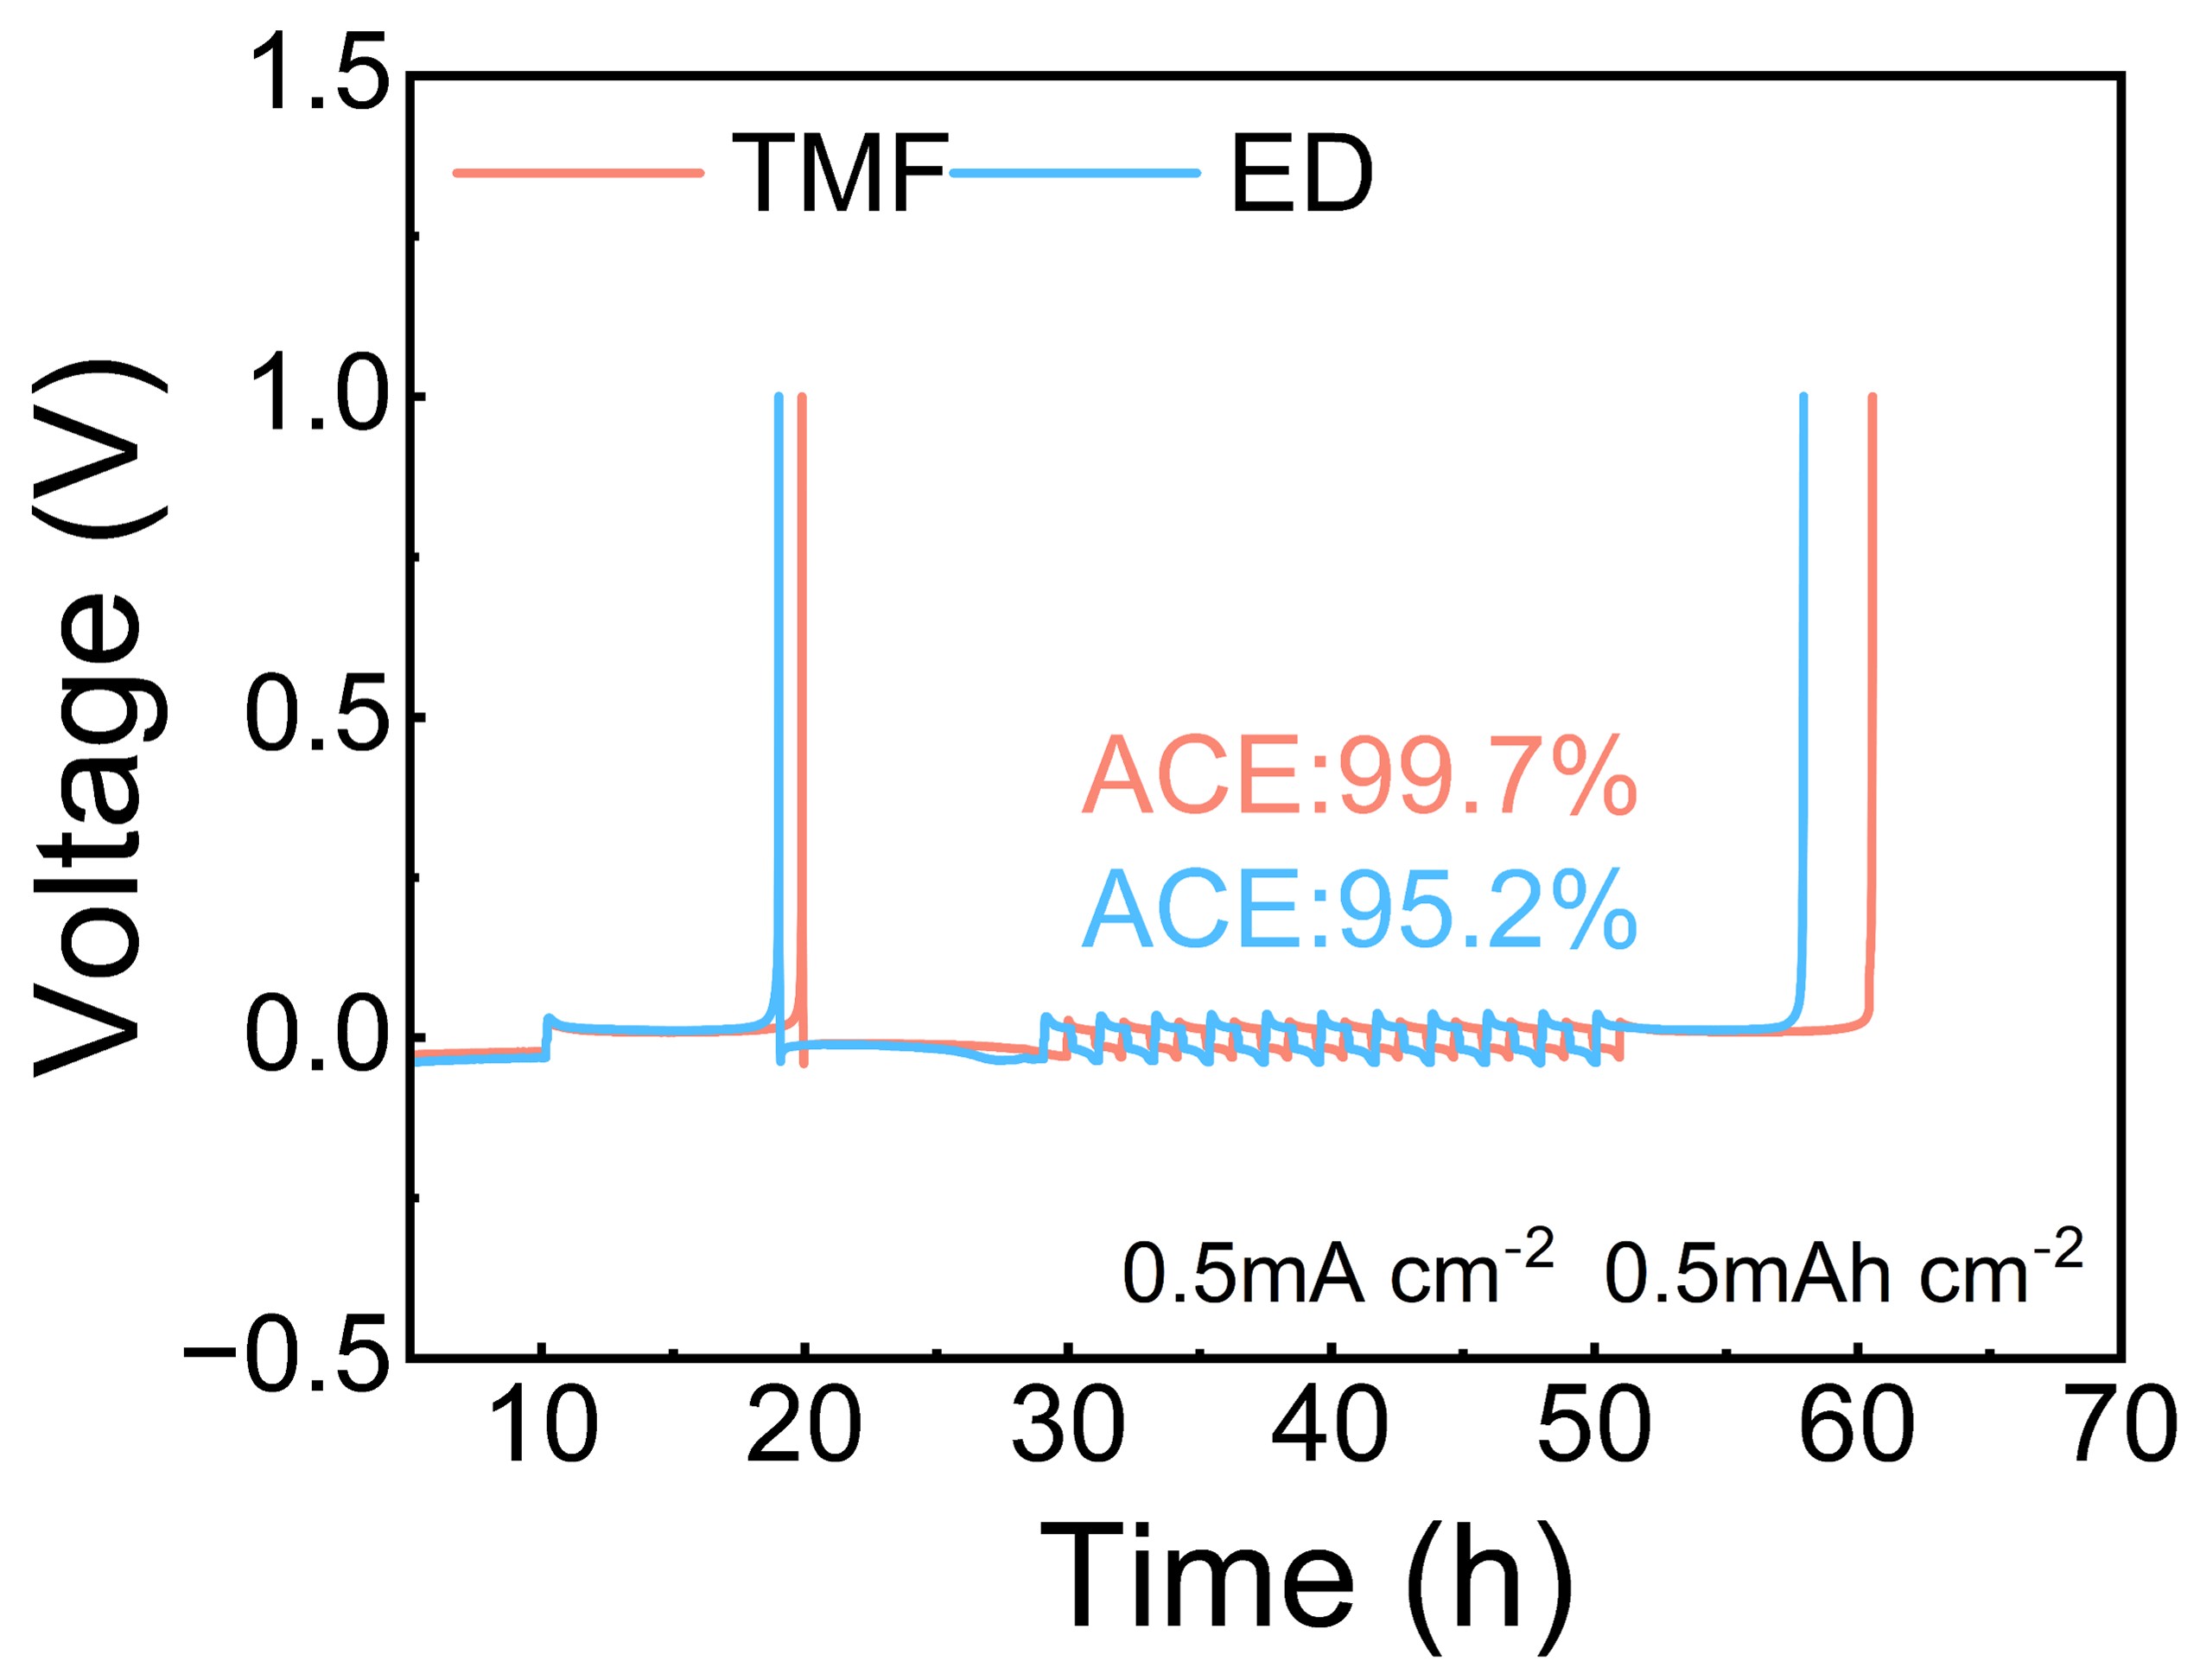


**Supplementary Fig.  13.** Measured ACEs of Li||Cu cells with TMF and ED at 0.5 mA cm-2 by the Aurbach method.


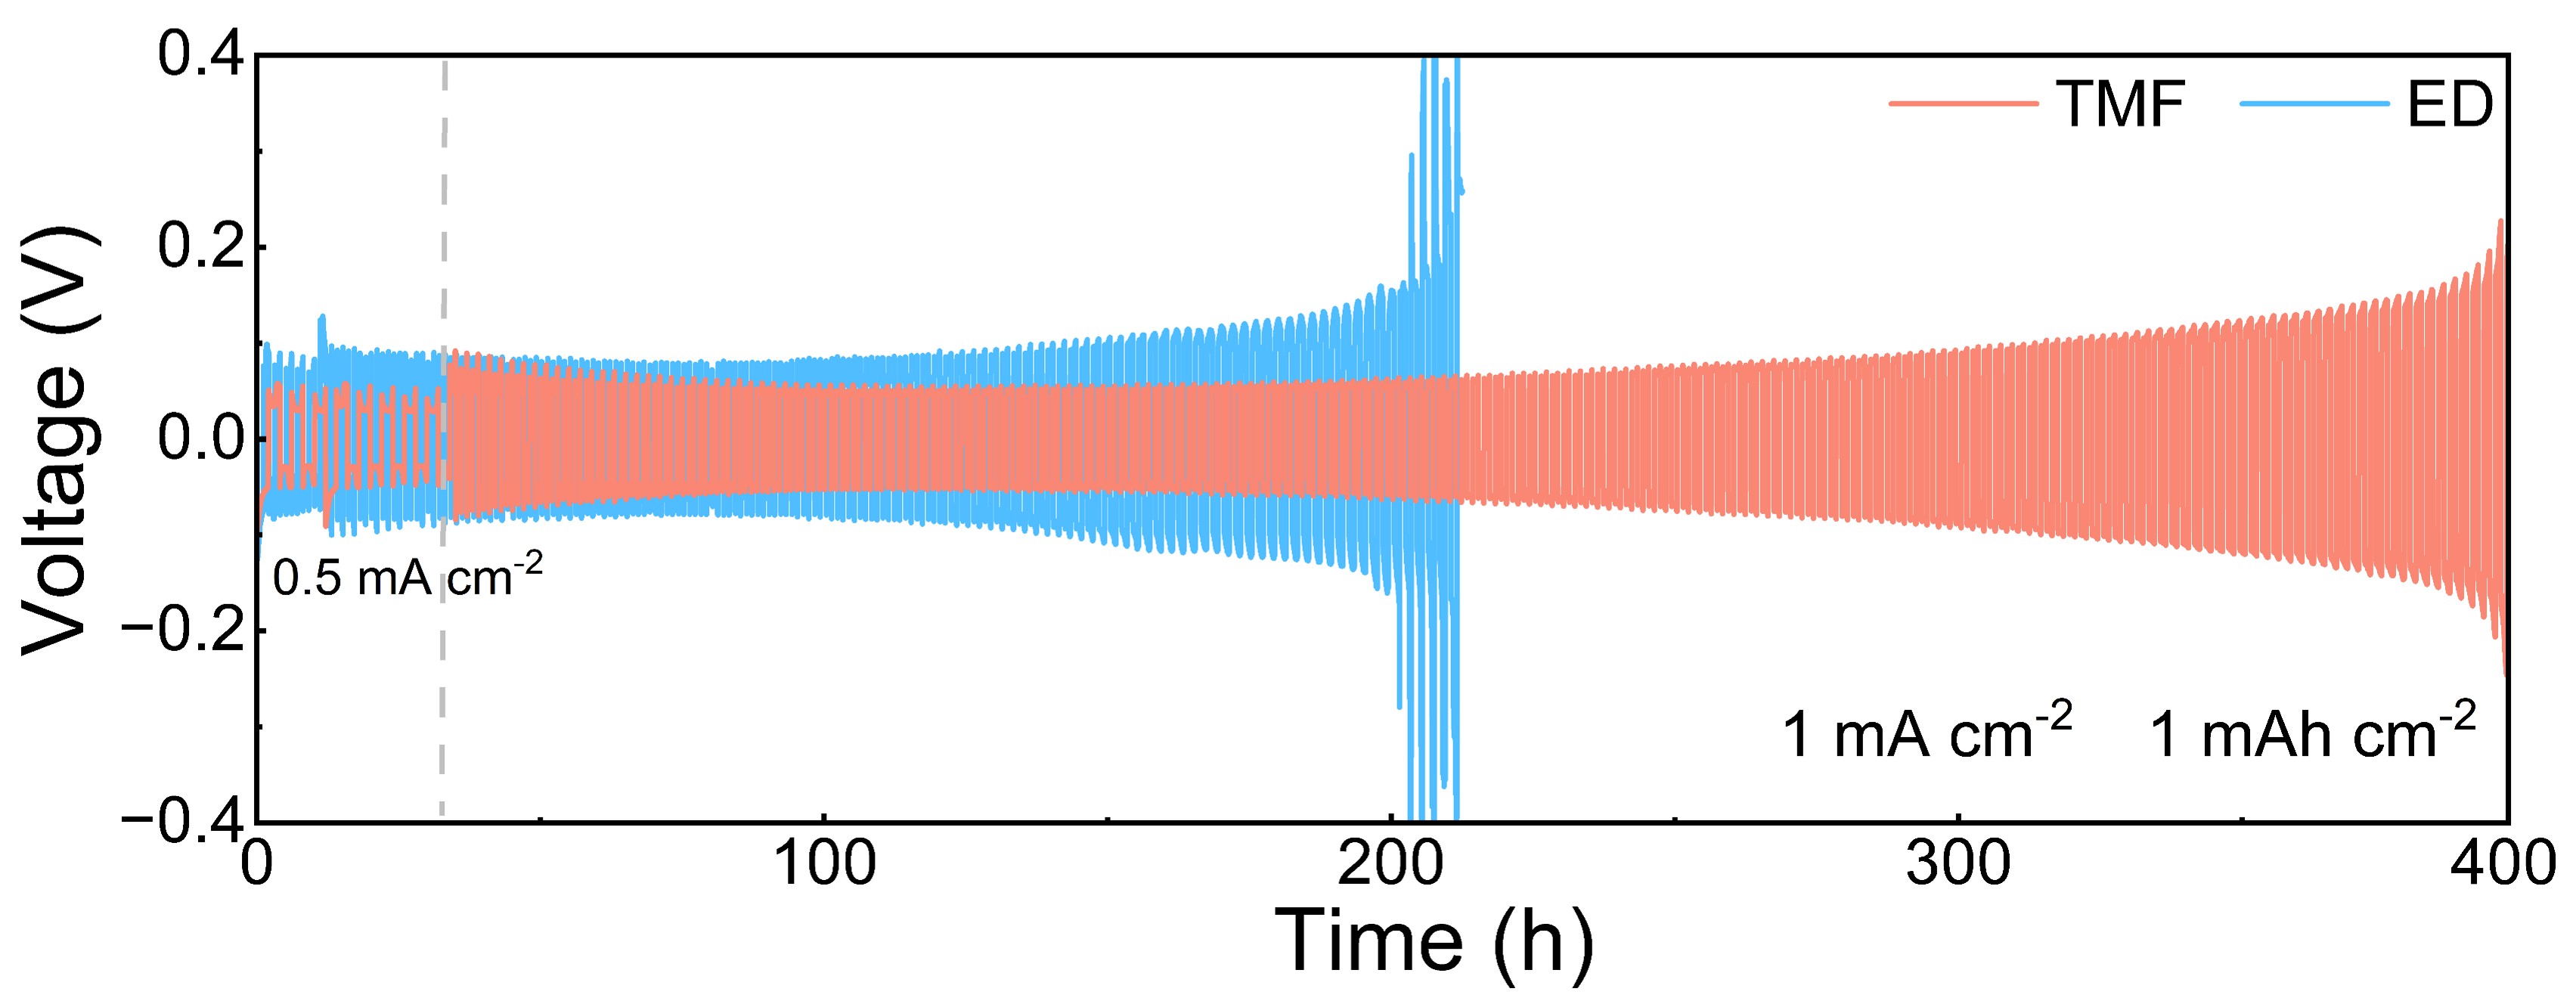


**Supplementary Fig.  14.** Voltage-Time profiles of different electrolytes in Li||Li symmetric cells at 1 mA cm-2.


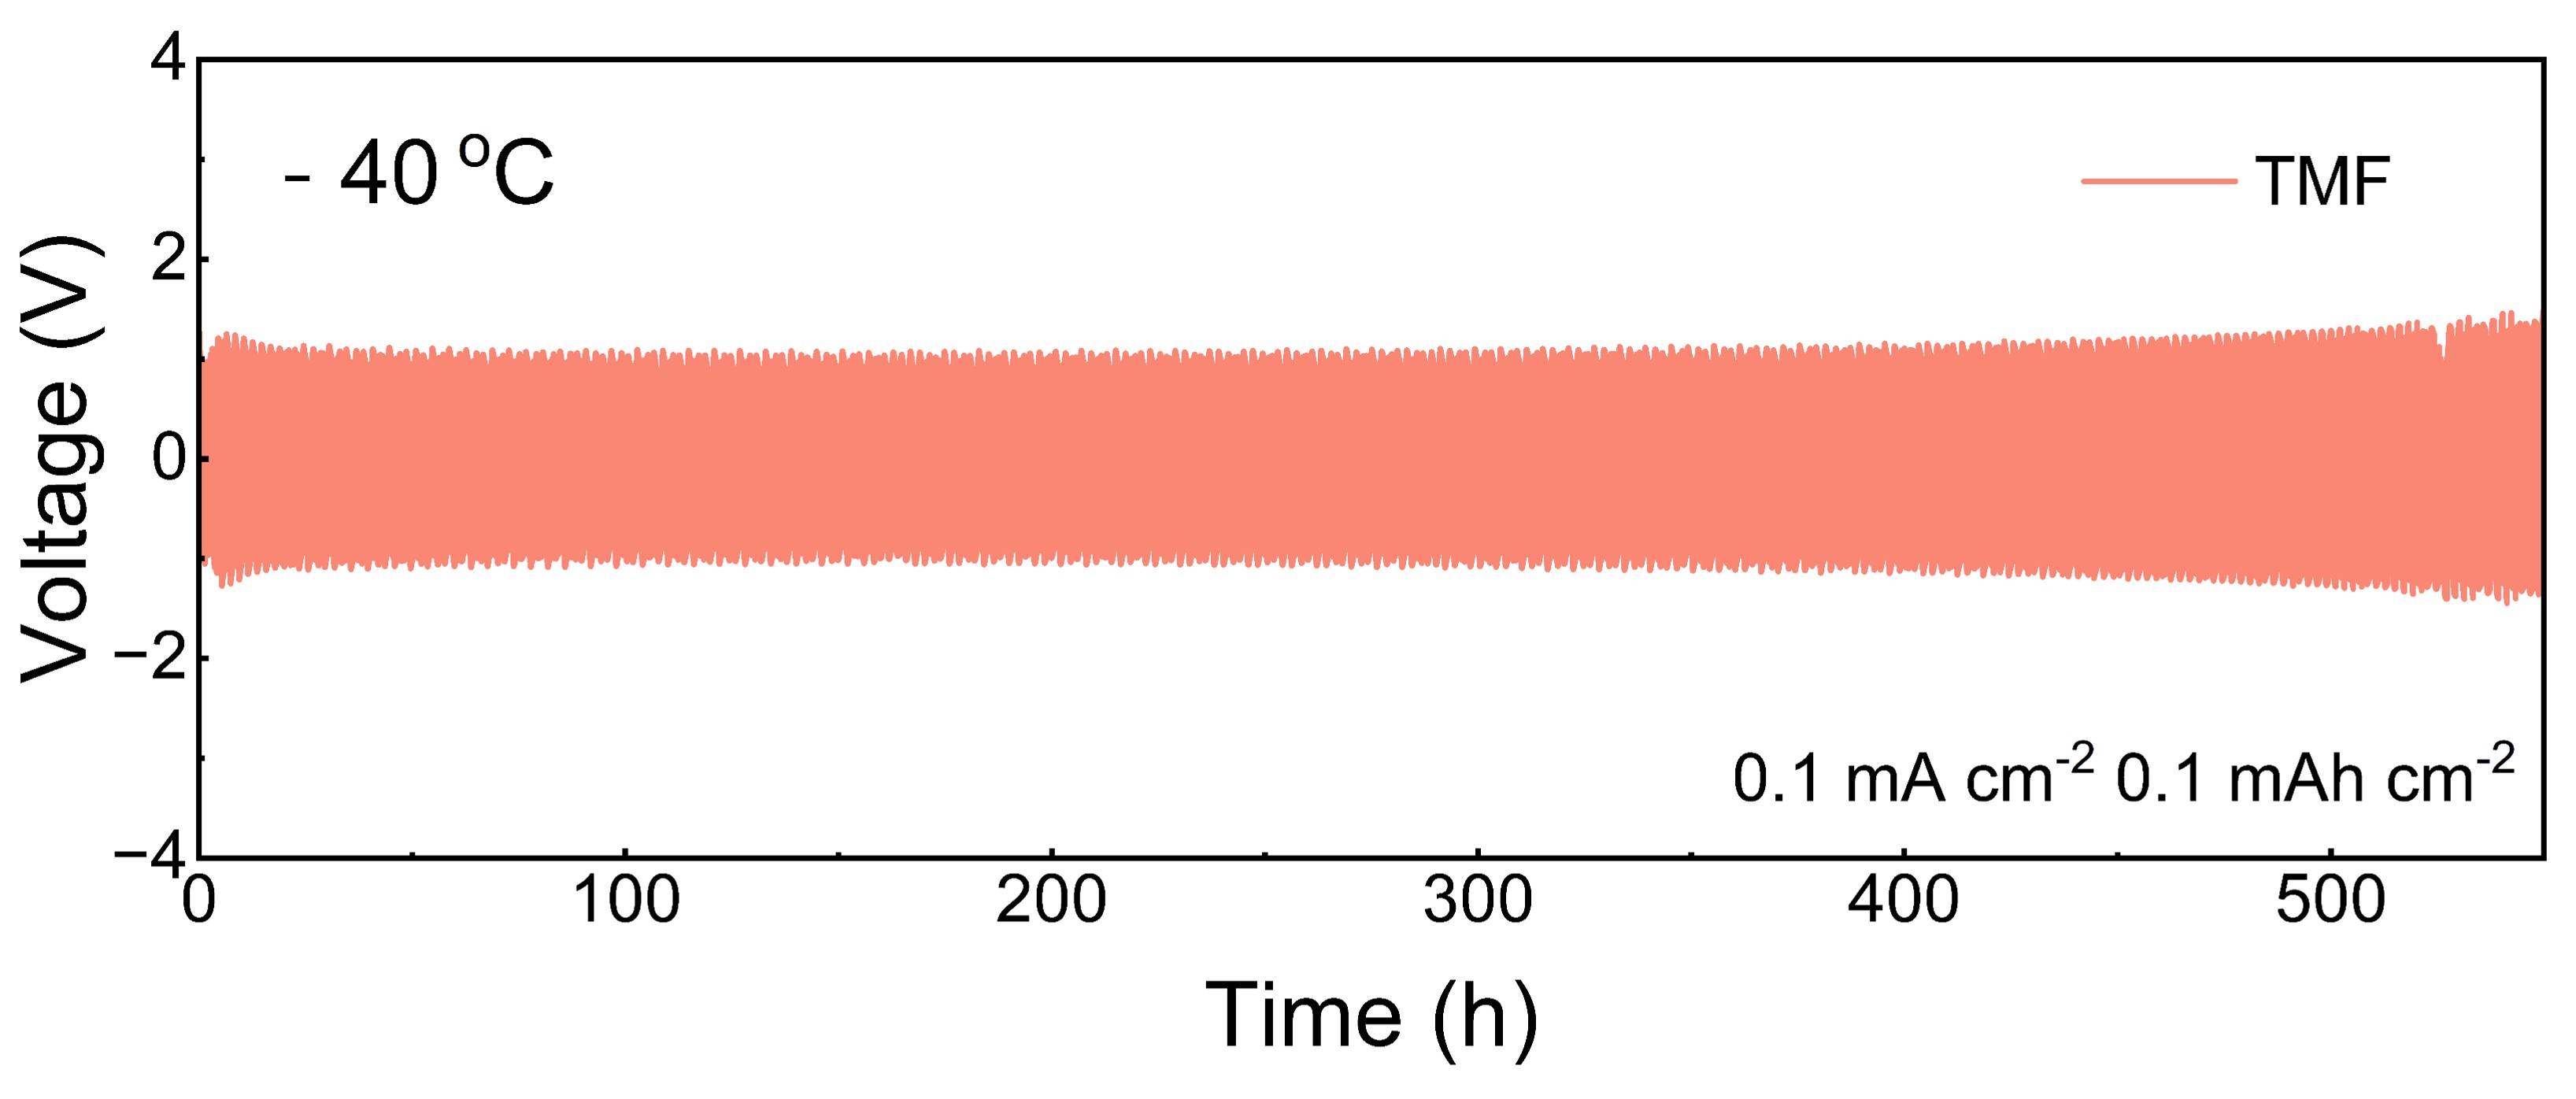


**Supplementary Fig.  15.** Voltage-Time profile of a Li||Li symmetric cell with TMF electrolyte at -40 °C.


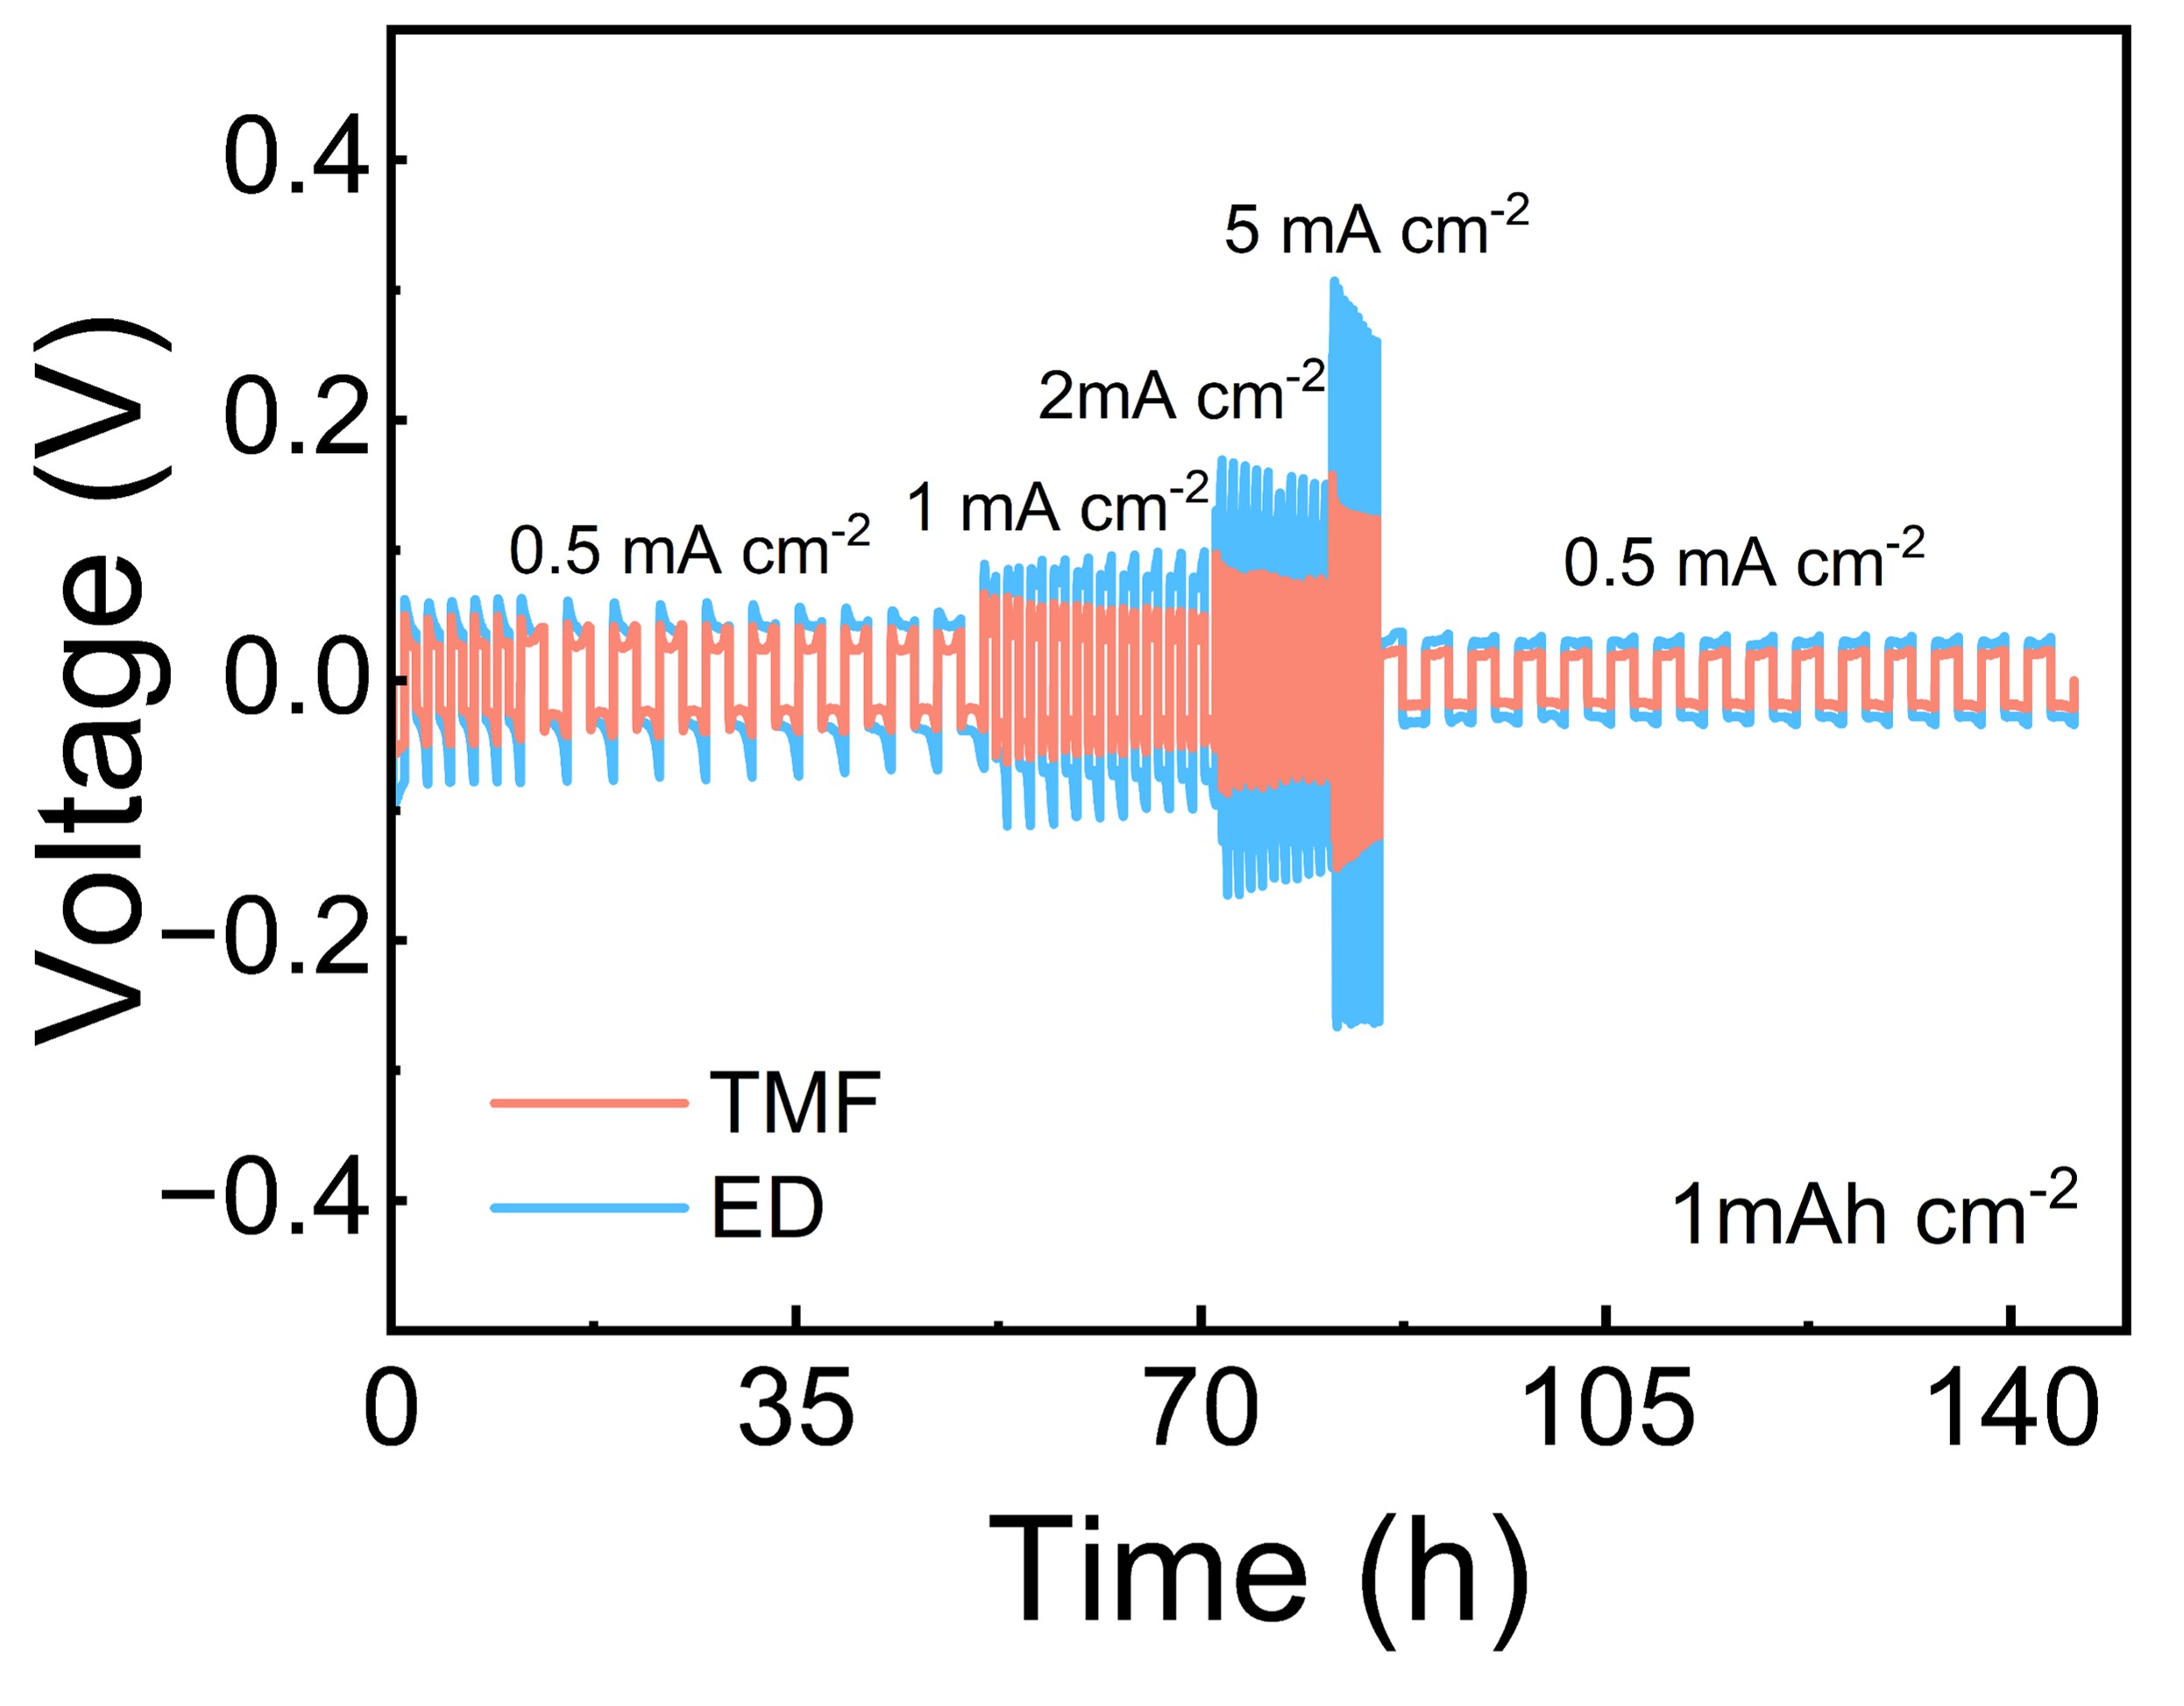


**Supplementary Fig.  16.** Rate capability of Li||Li symmetric cells with different electrolytes from 0.5 to 5 mA cm-2.


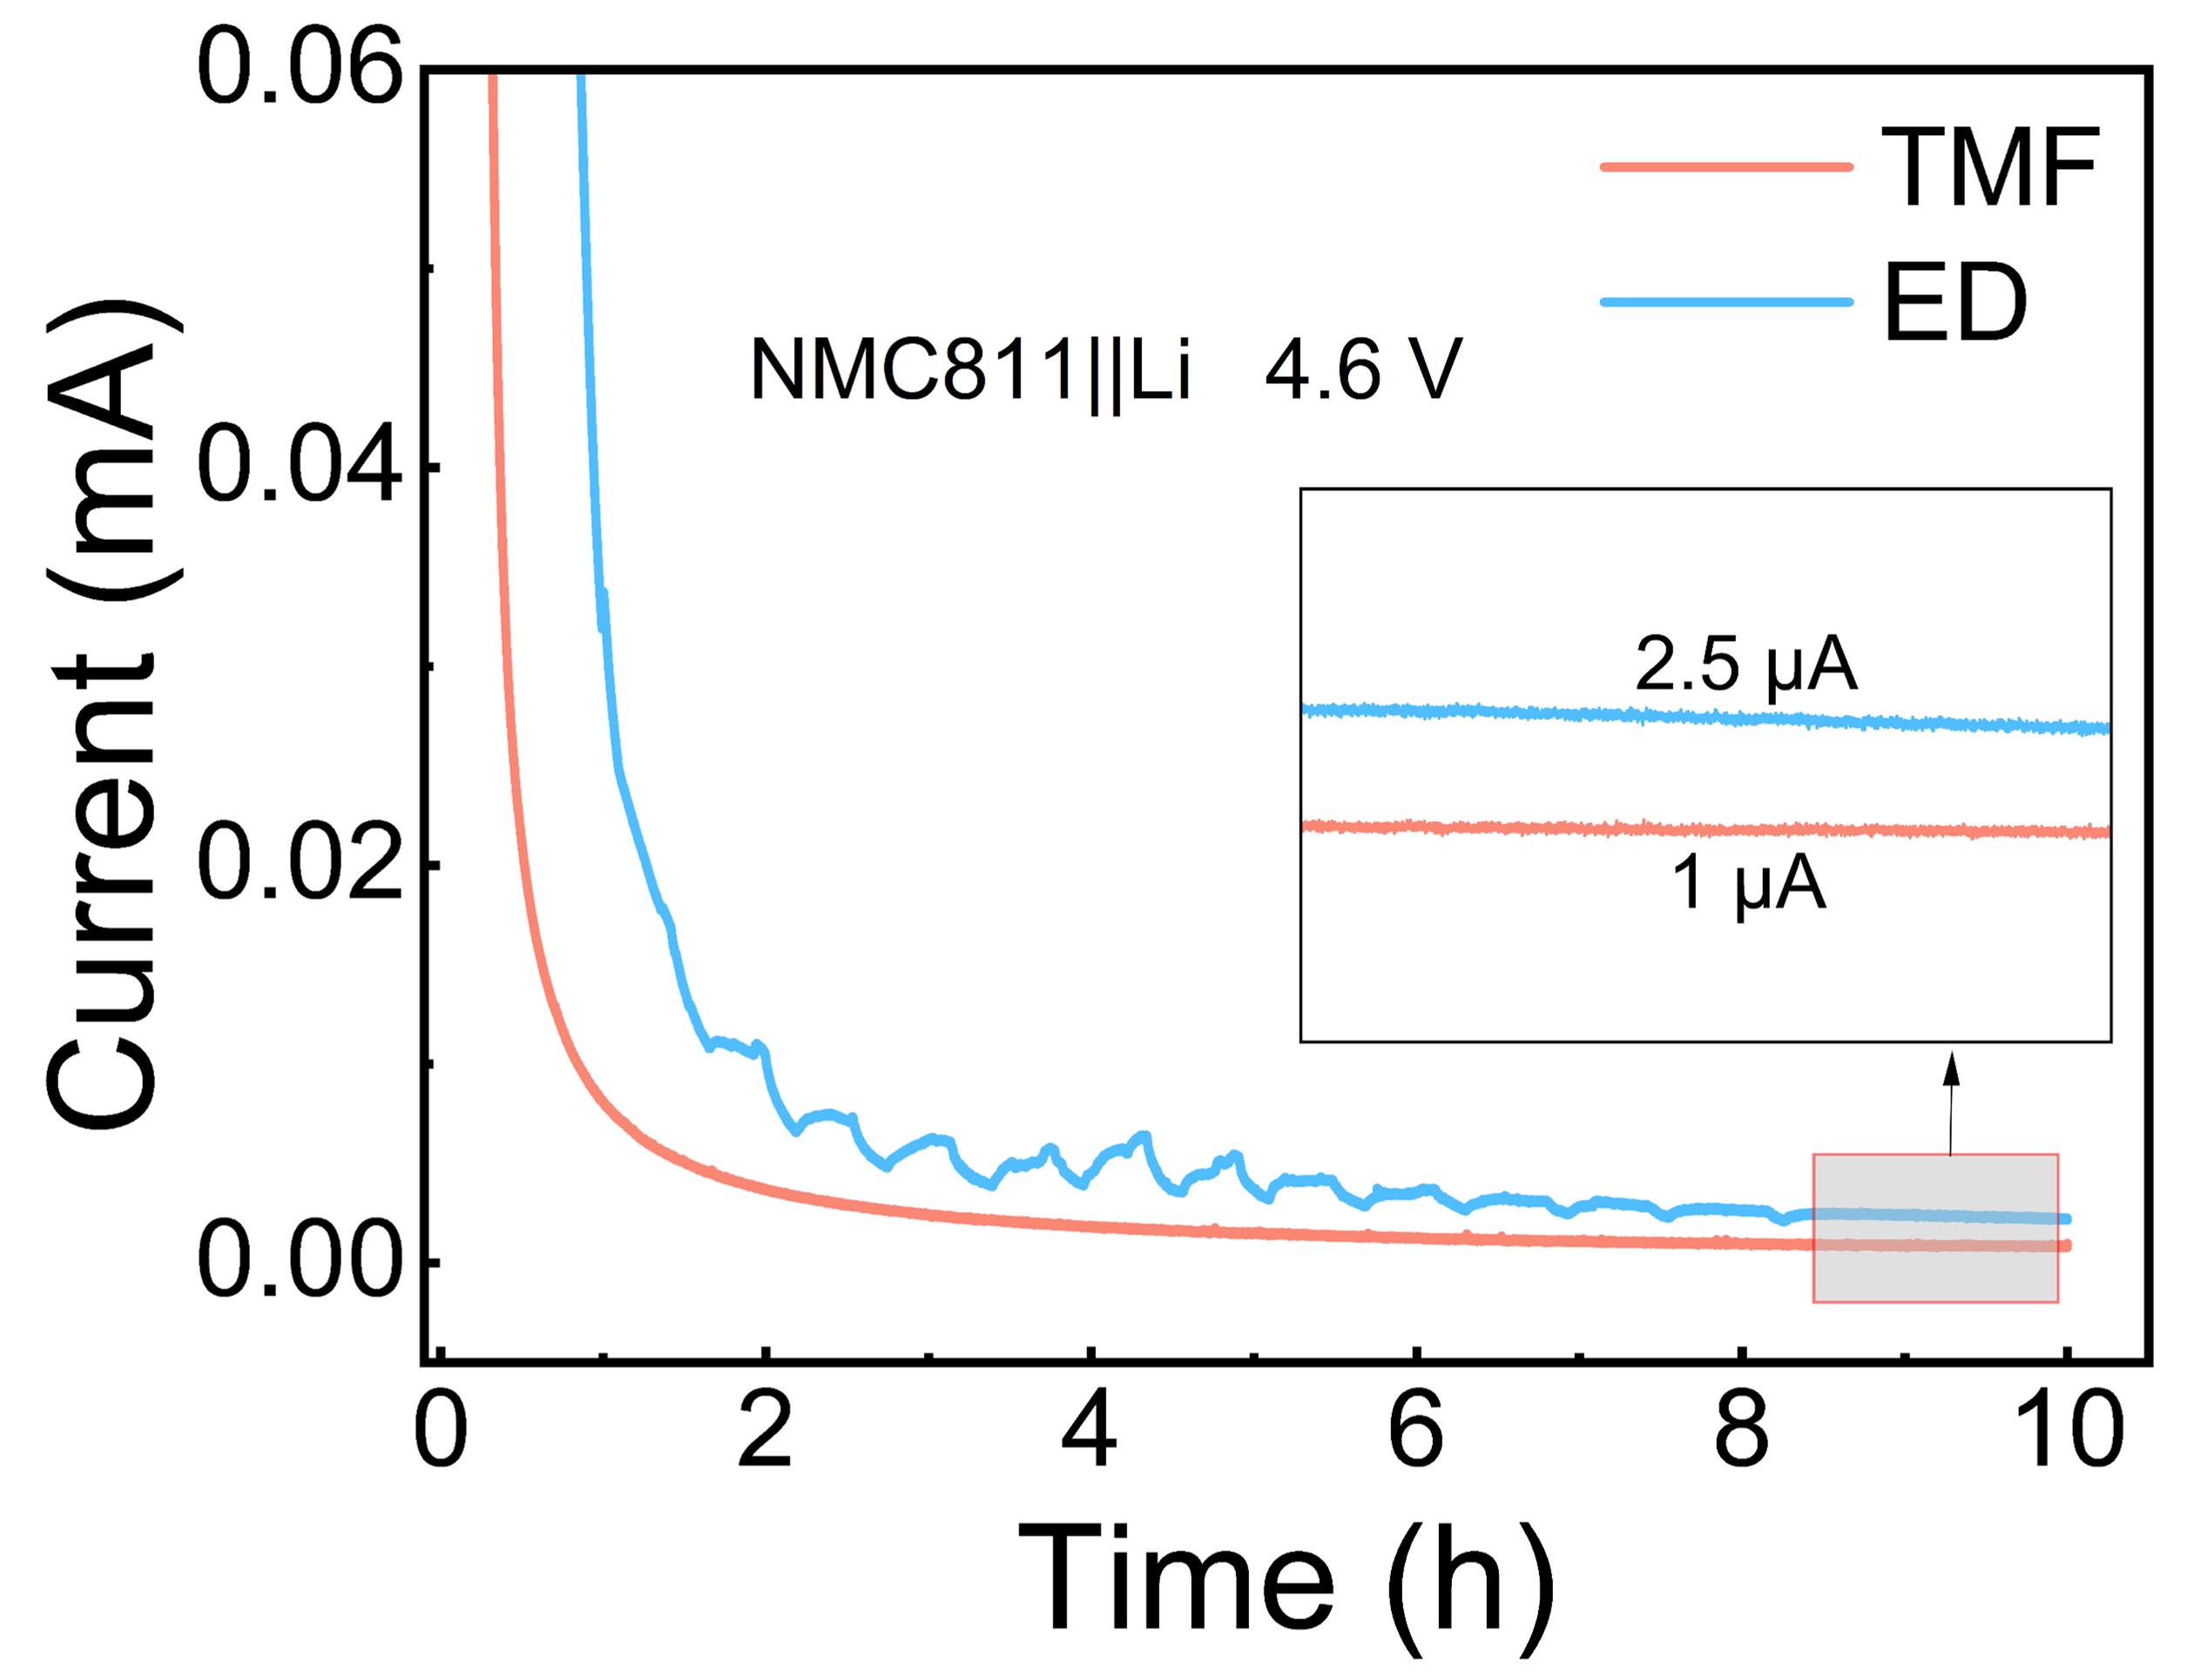


**Supplementary Fig.  17.** Stability tests of NMC811 with different electrolytes.


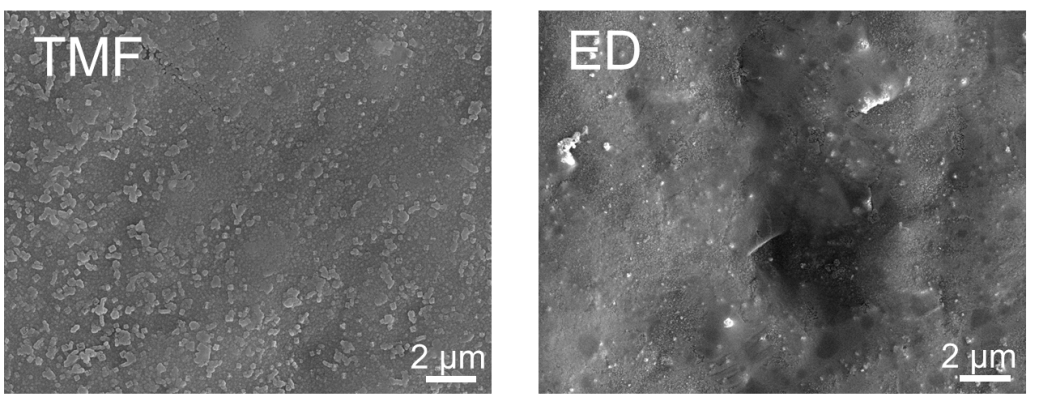


**Supplementary Fig.  18.** SEM images of Al foil after potentiostatic polarization.


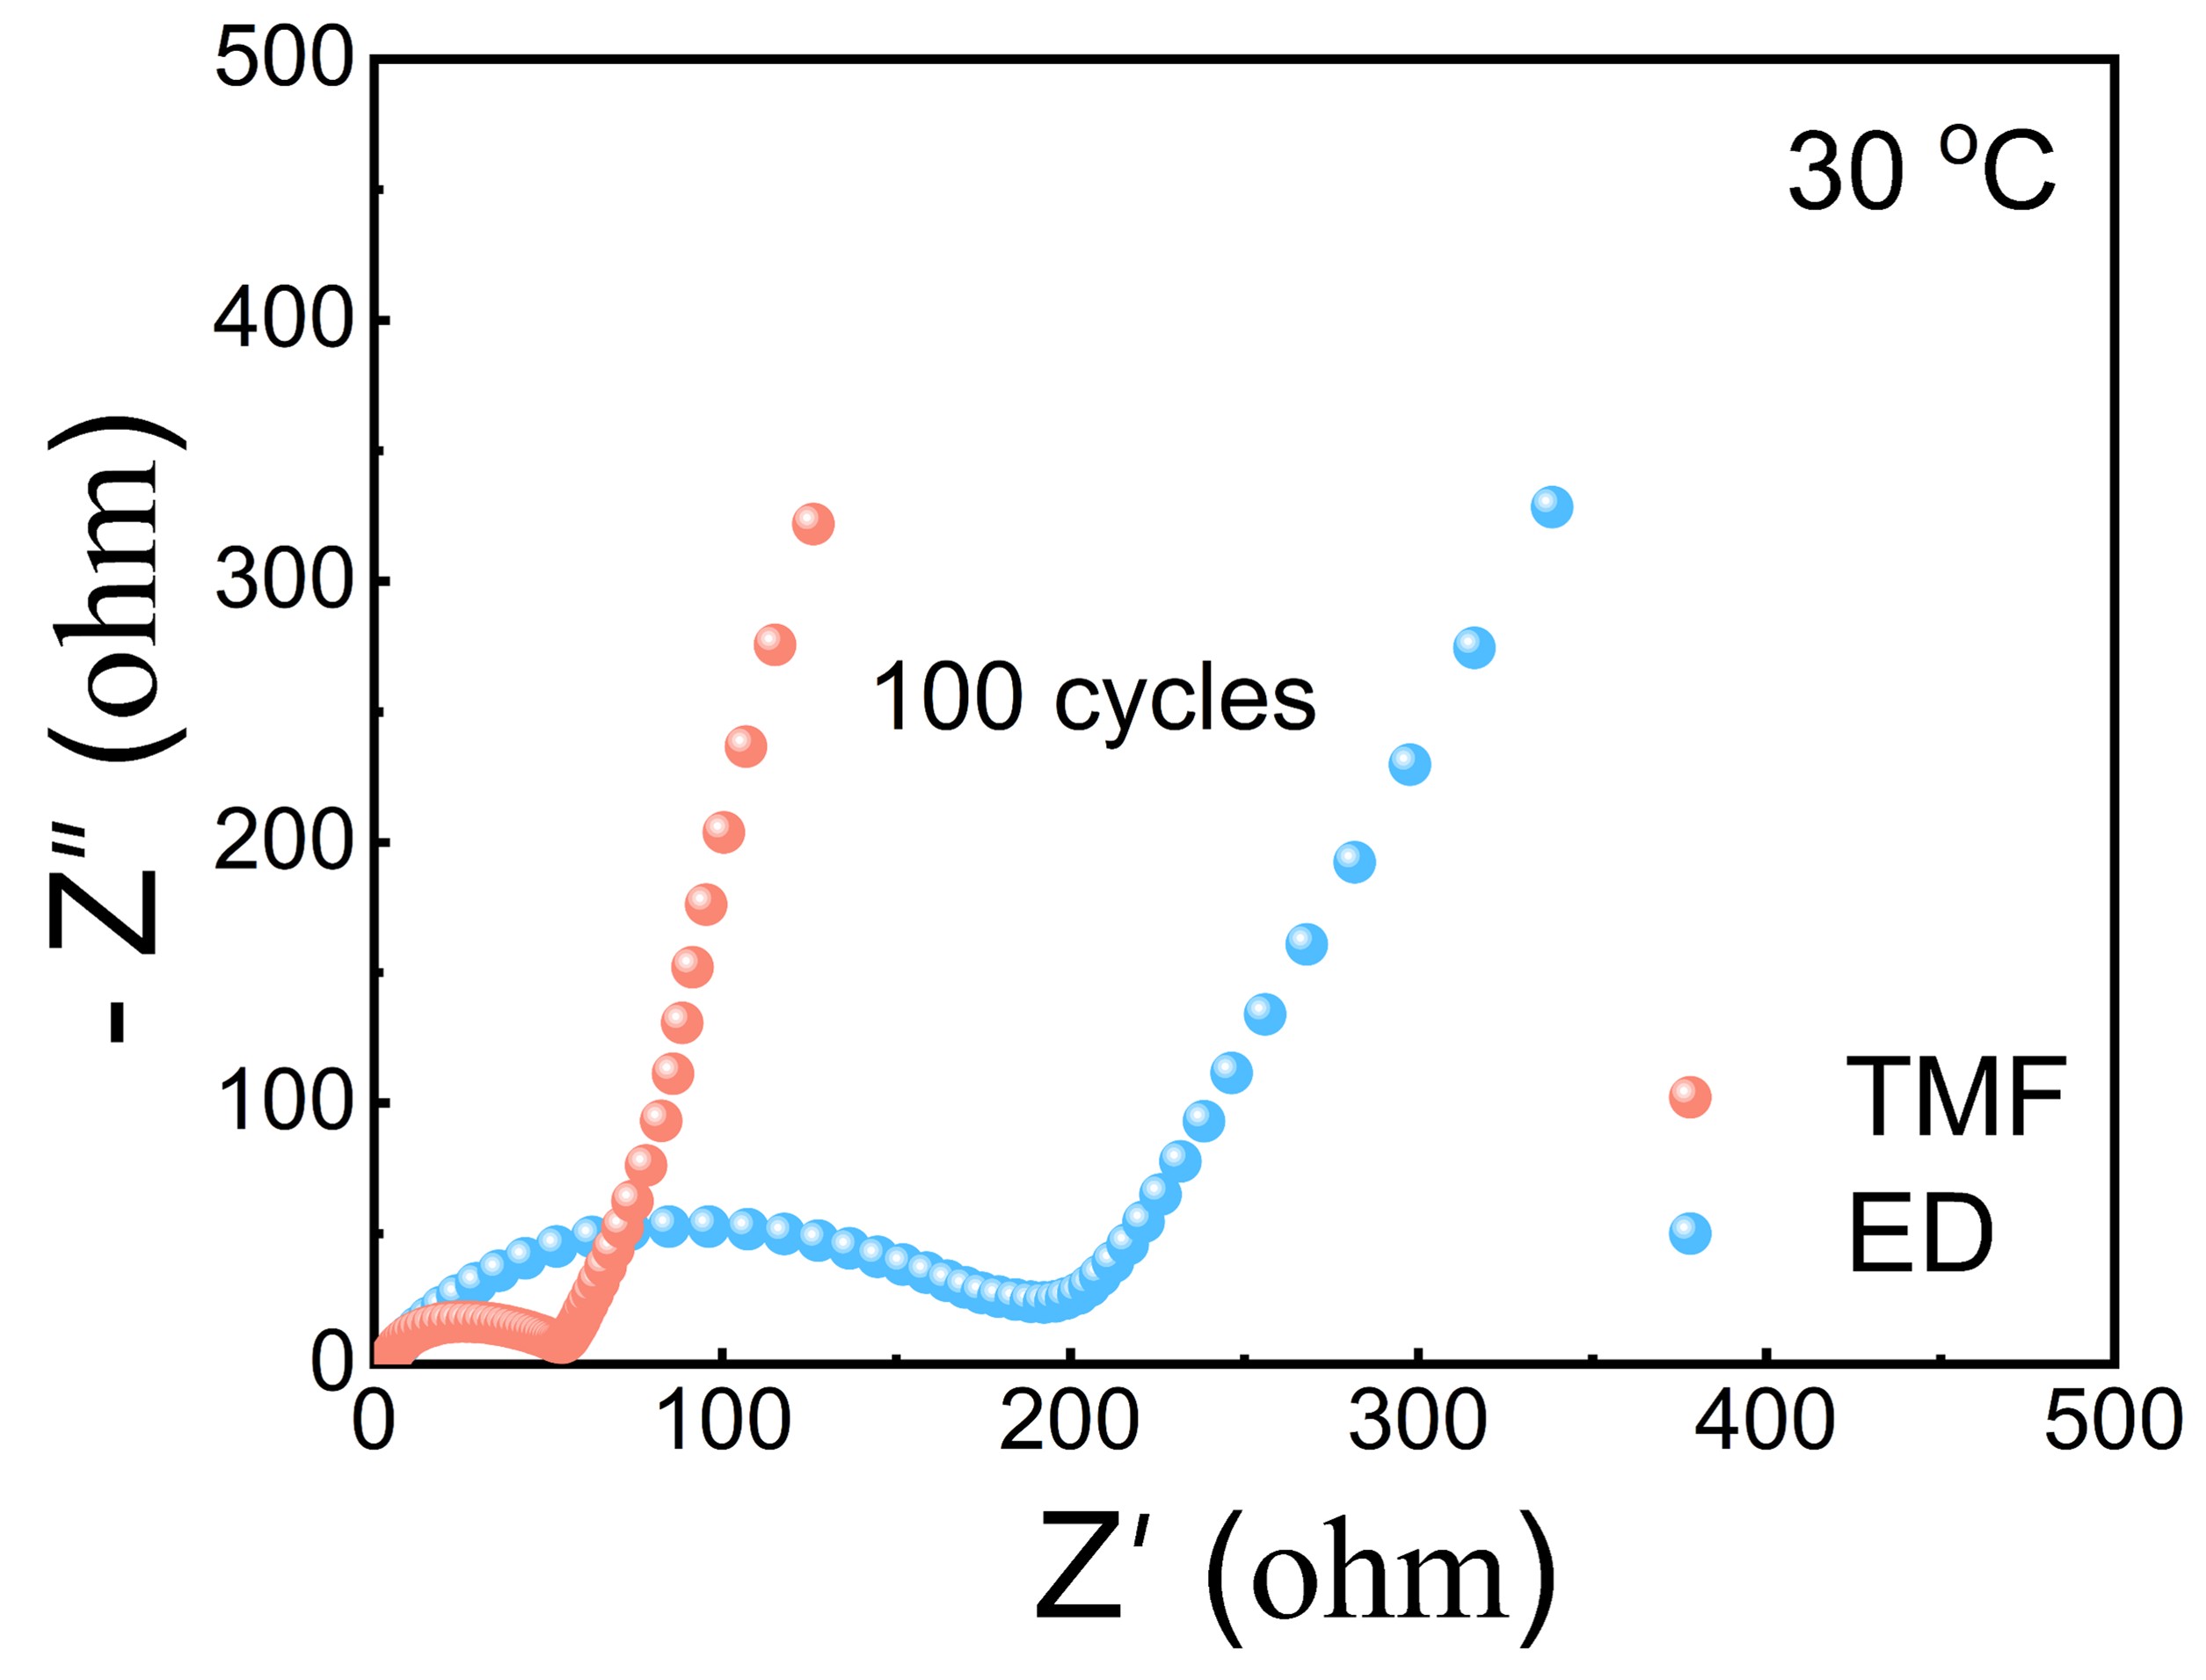


**Supplementary Fig.  19.** Nyquist plots of NMC811||Li cells with TMF and ED electrolytes after 100 cycles at 30 °C.


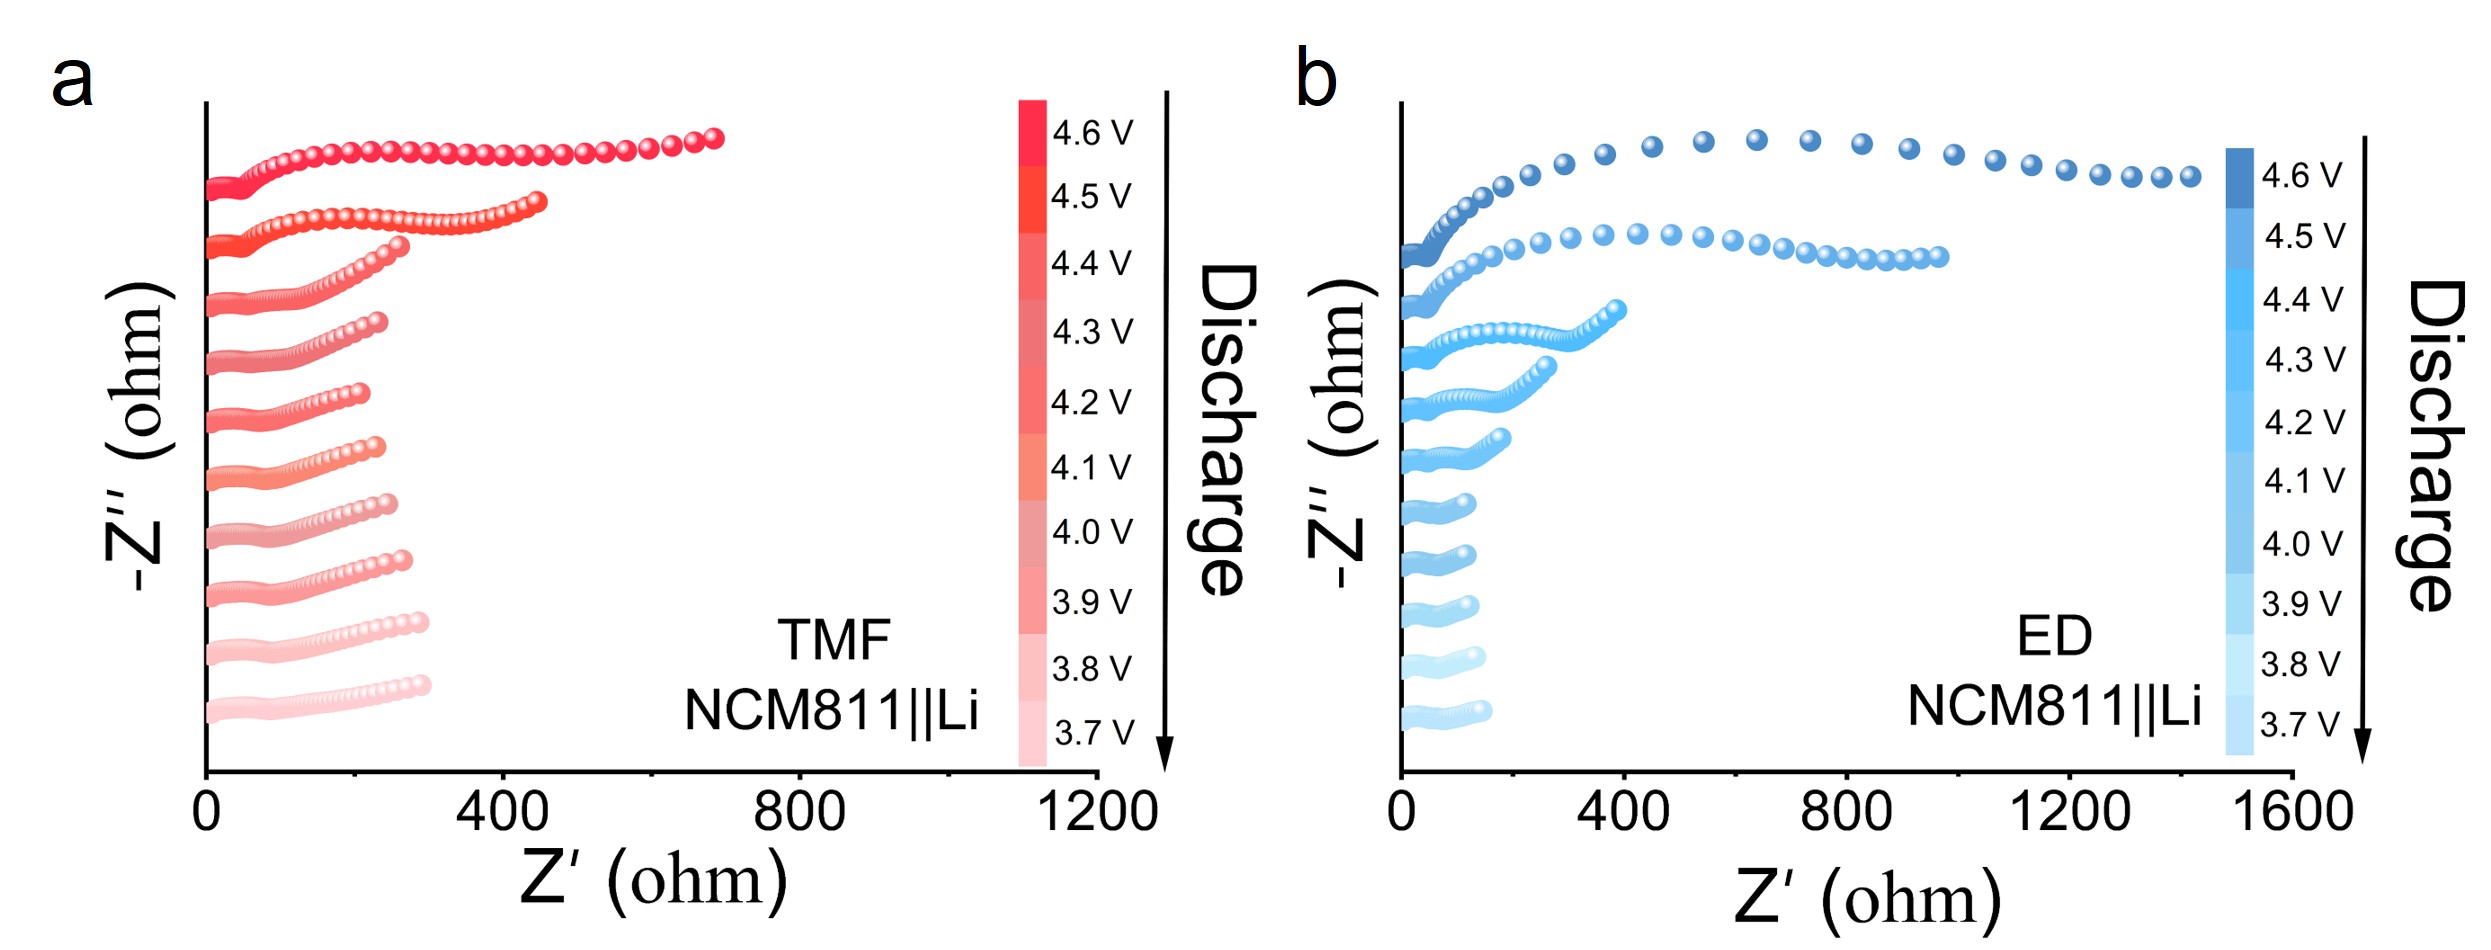


**Supplementary Fig.  20.** In situ Nyquist plots of cells with different electrolytes during discharge at 30 °C.


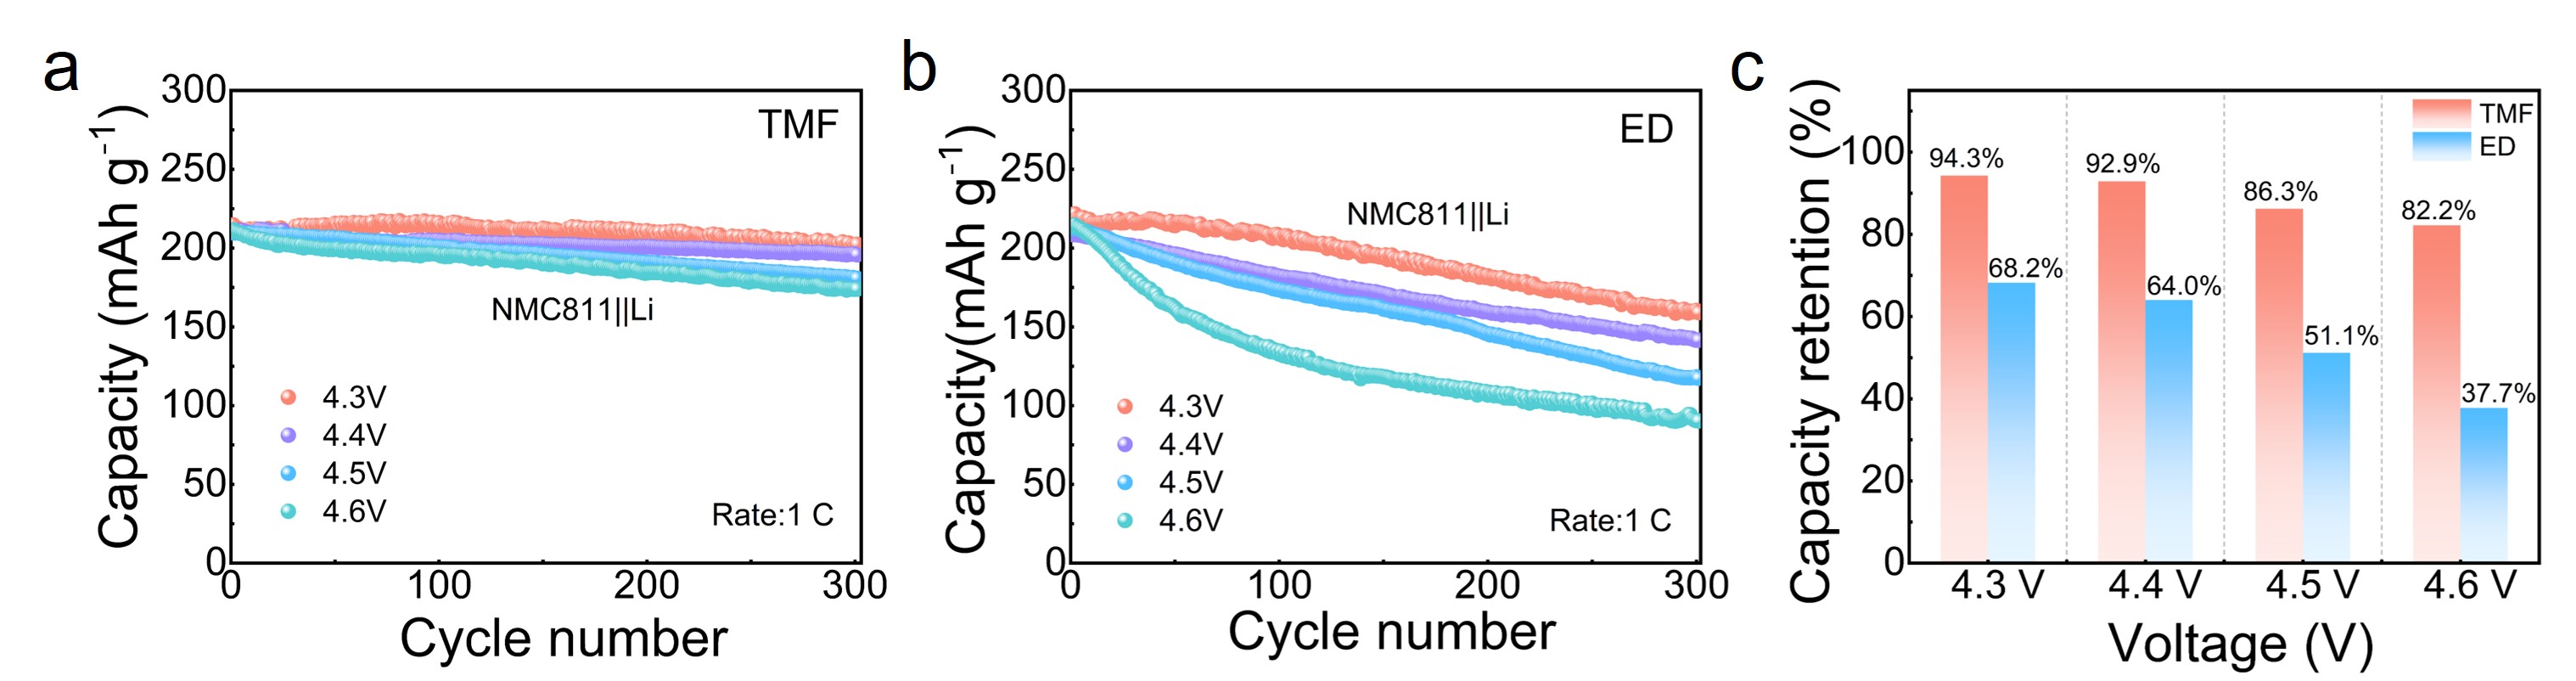


**Supplementary Fig.  21.** Cells performance at different cut-off voltages using different electrolytes.


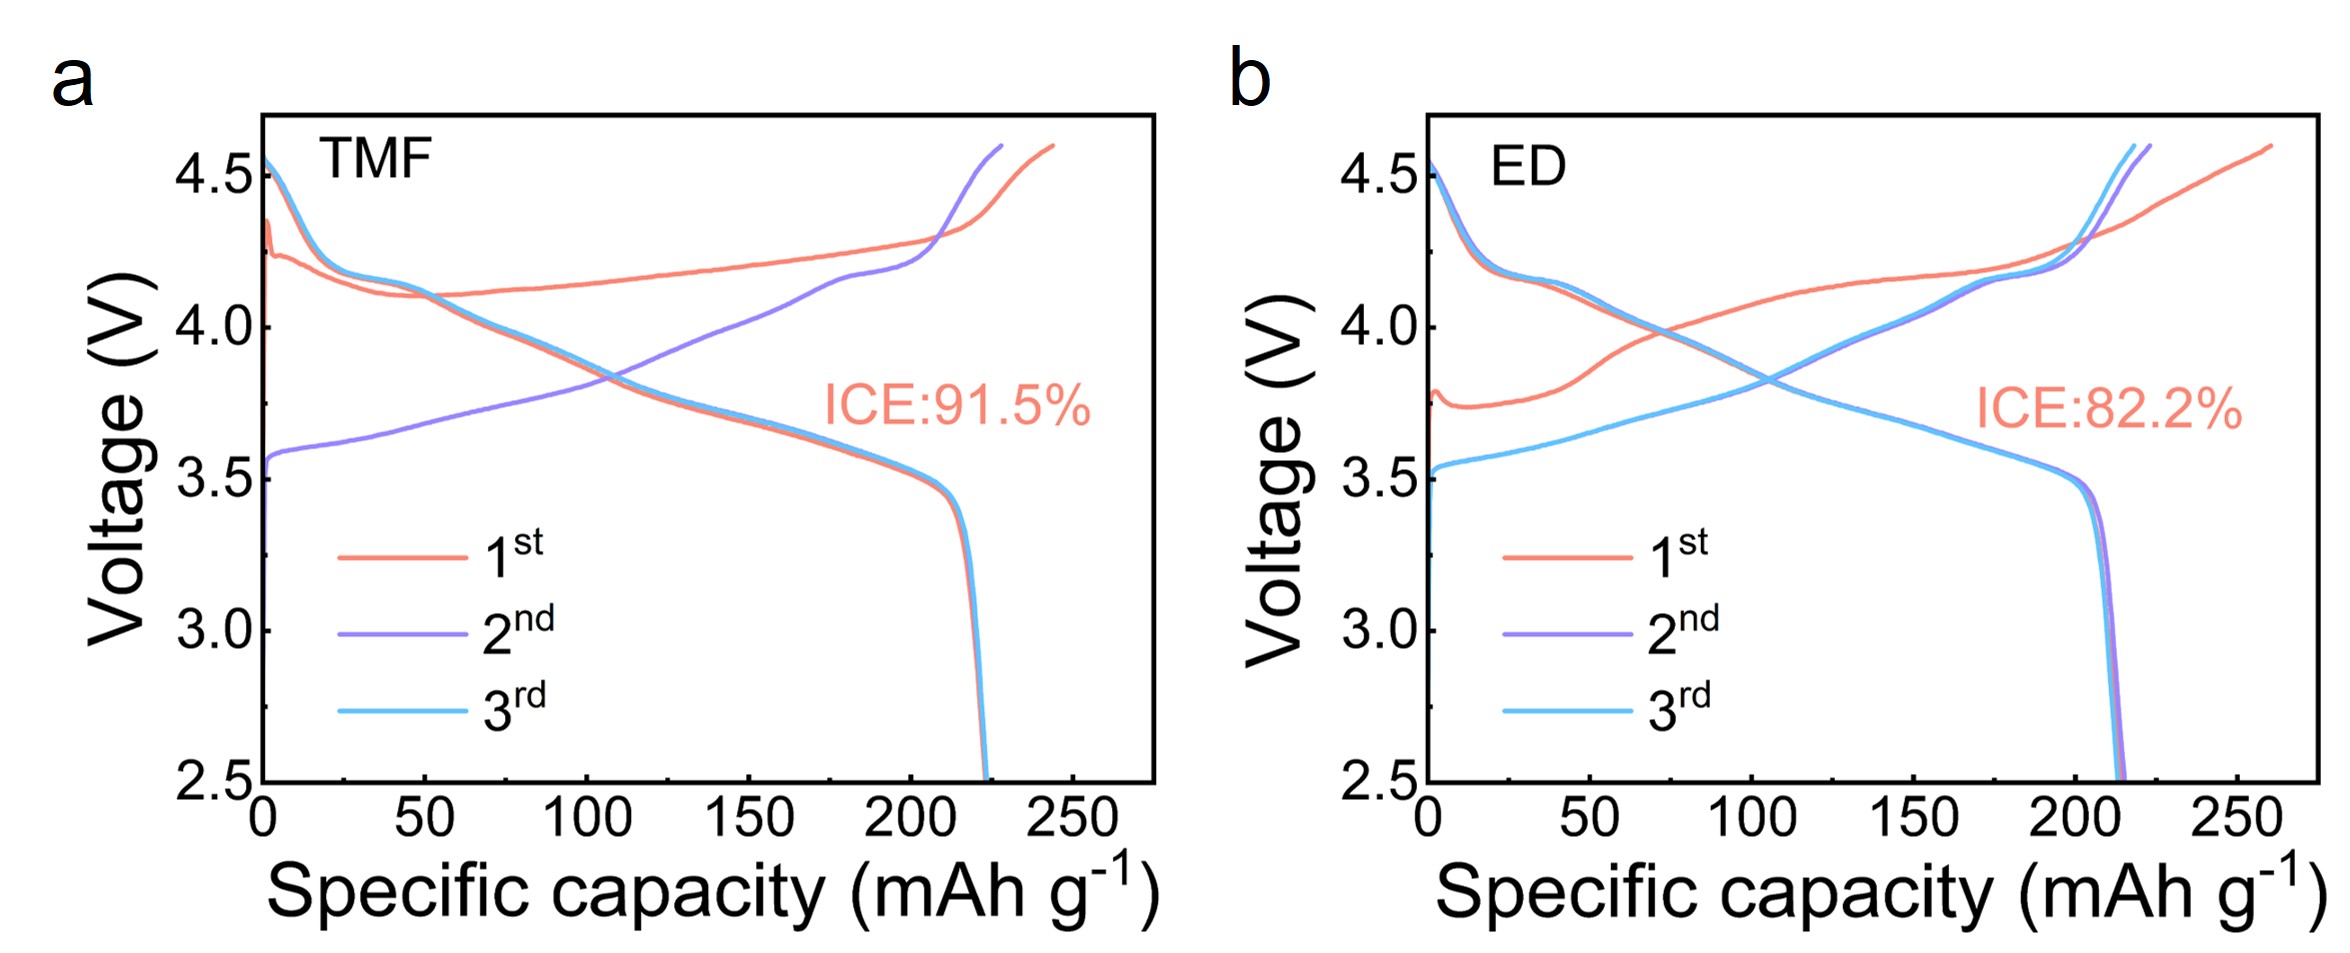


**Supplementary Fig.  22.** Charge-discharge curves of NMC811||Li cells during the first three cycles at 0.2 C using different electrolytes.


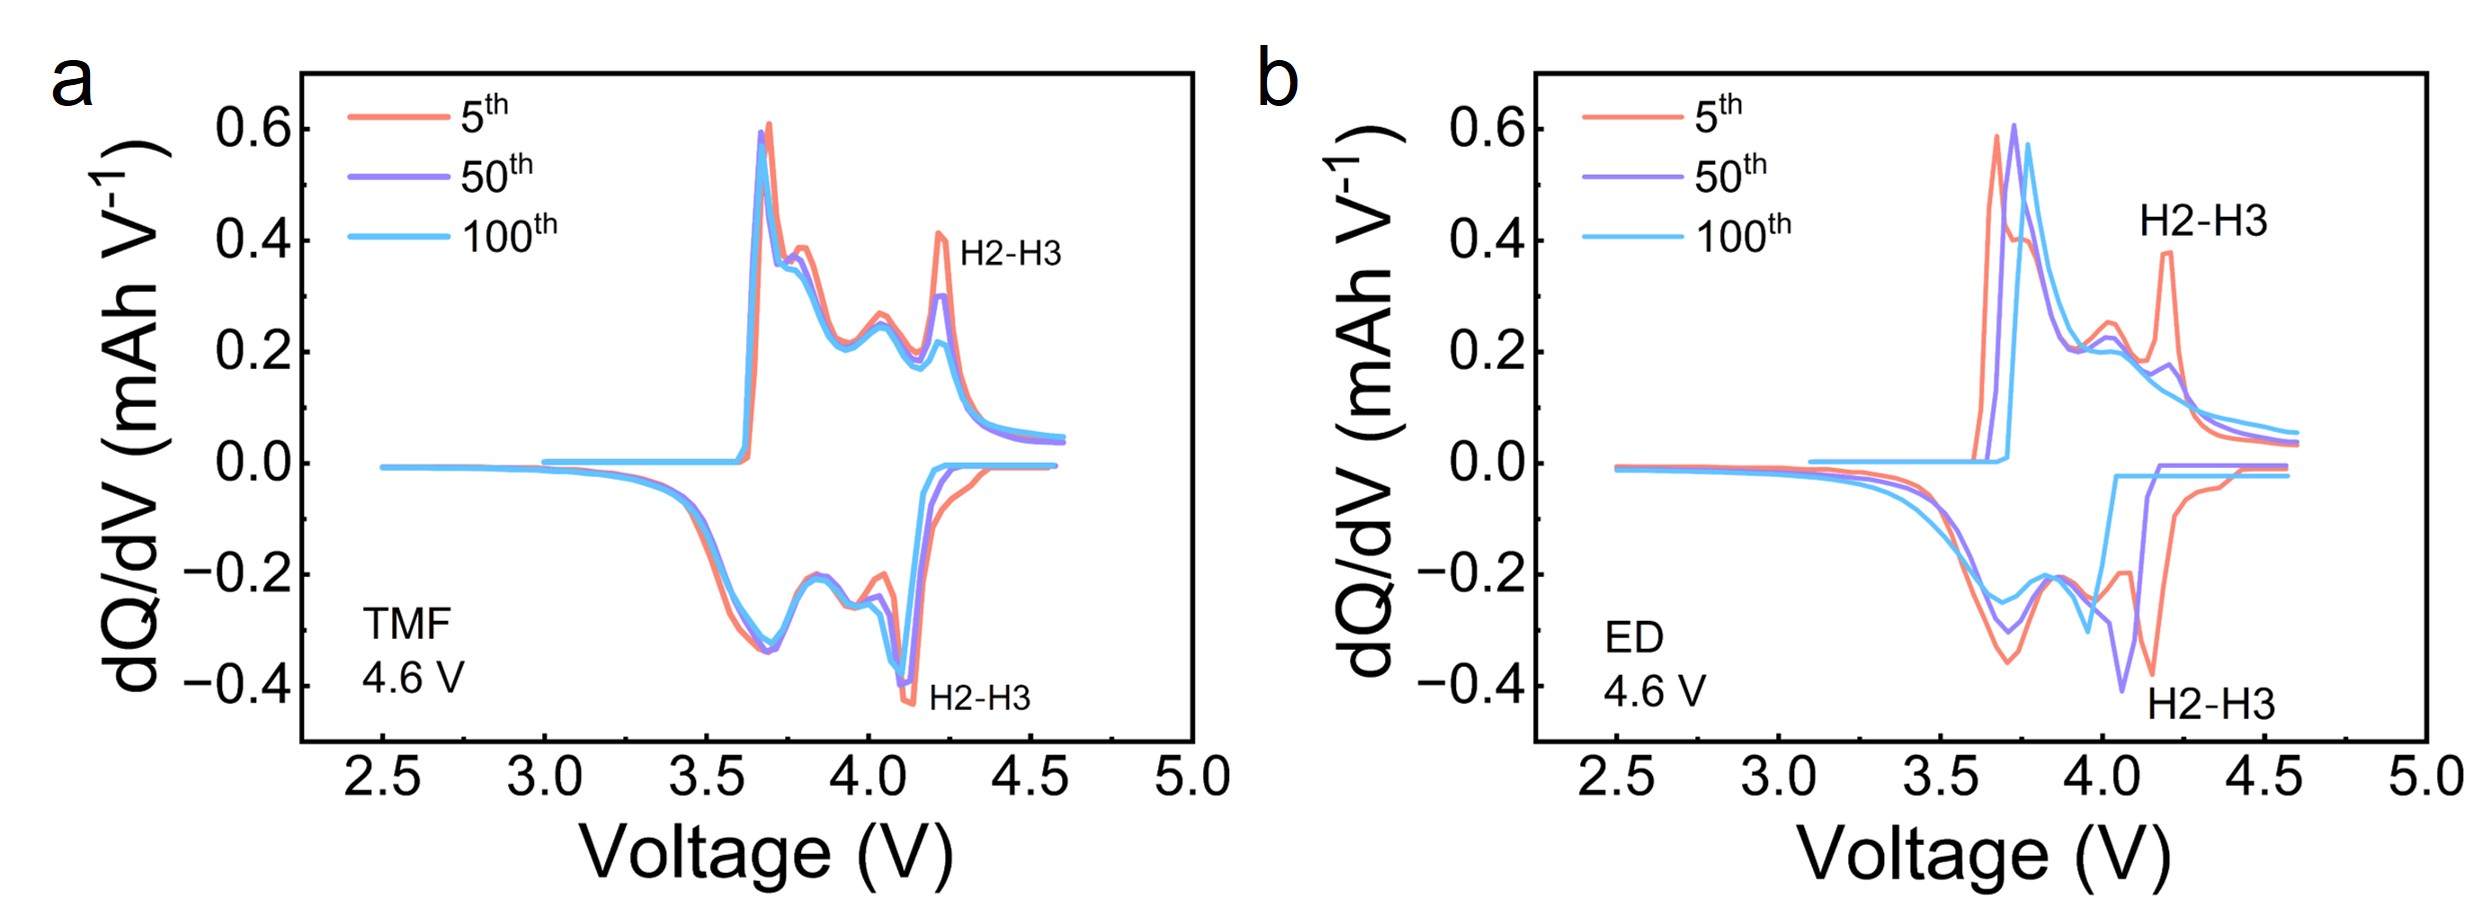


**Supplementary Fig.  23.** dQ/dV vs. voltage curves for cells with different electrolytes.


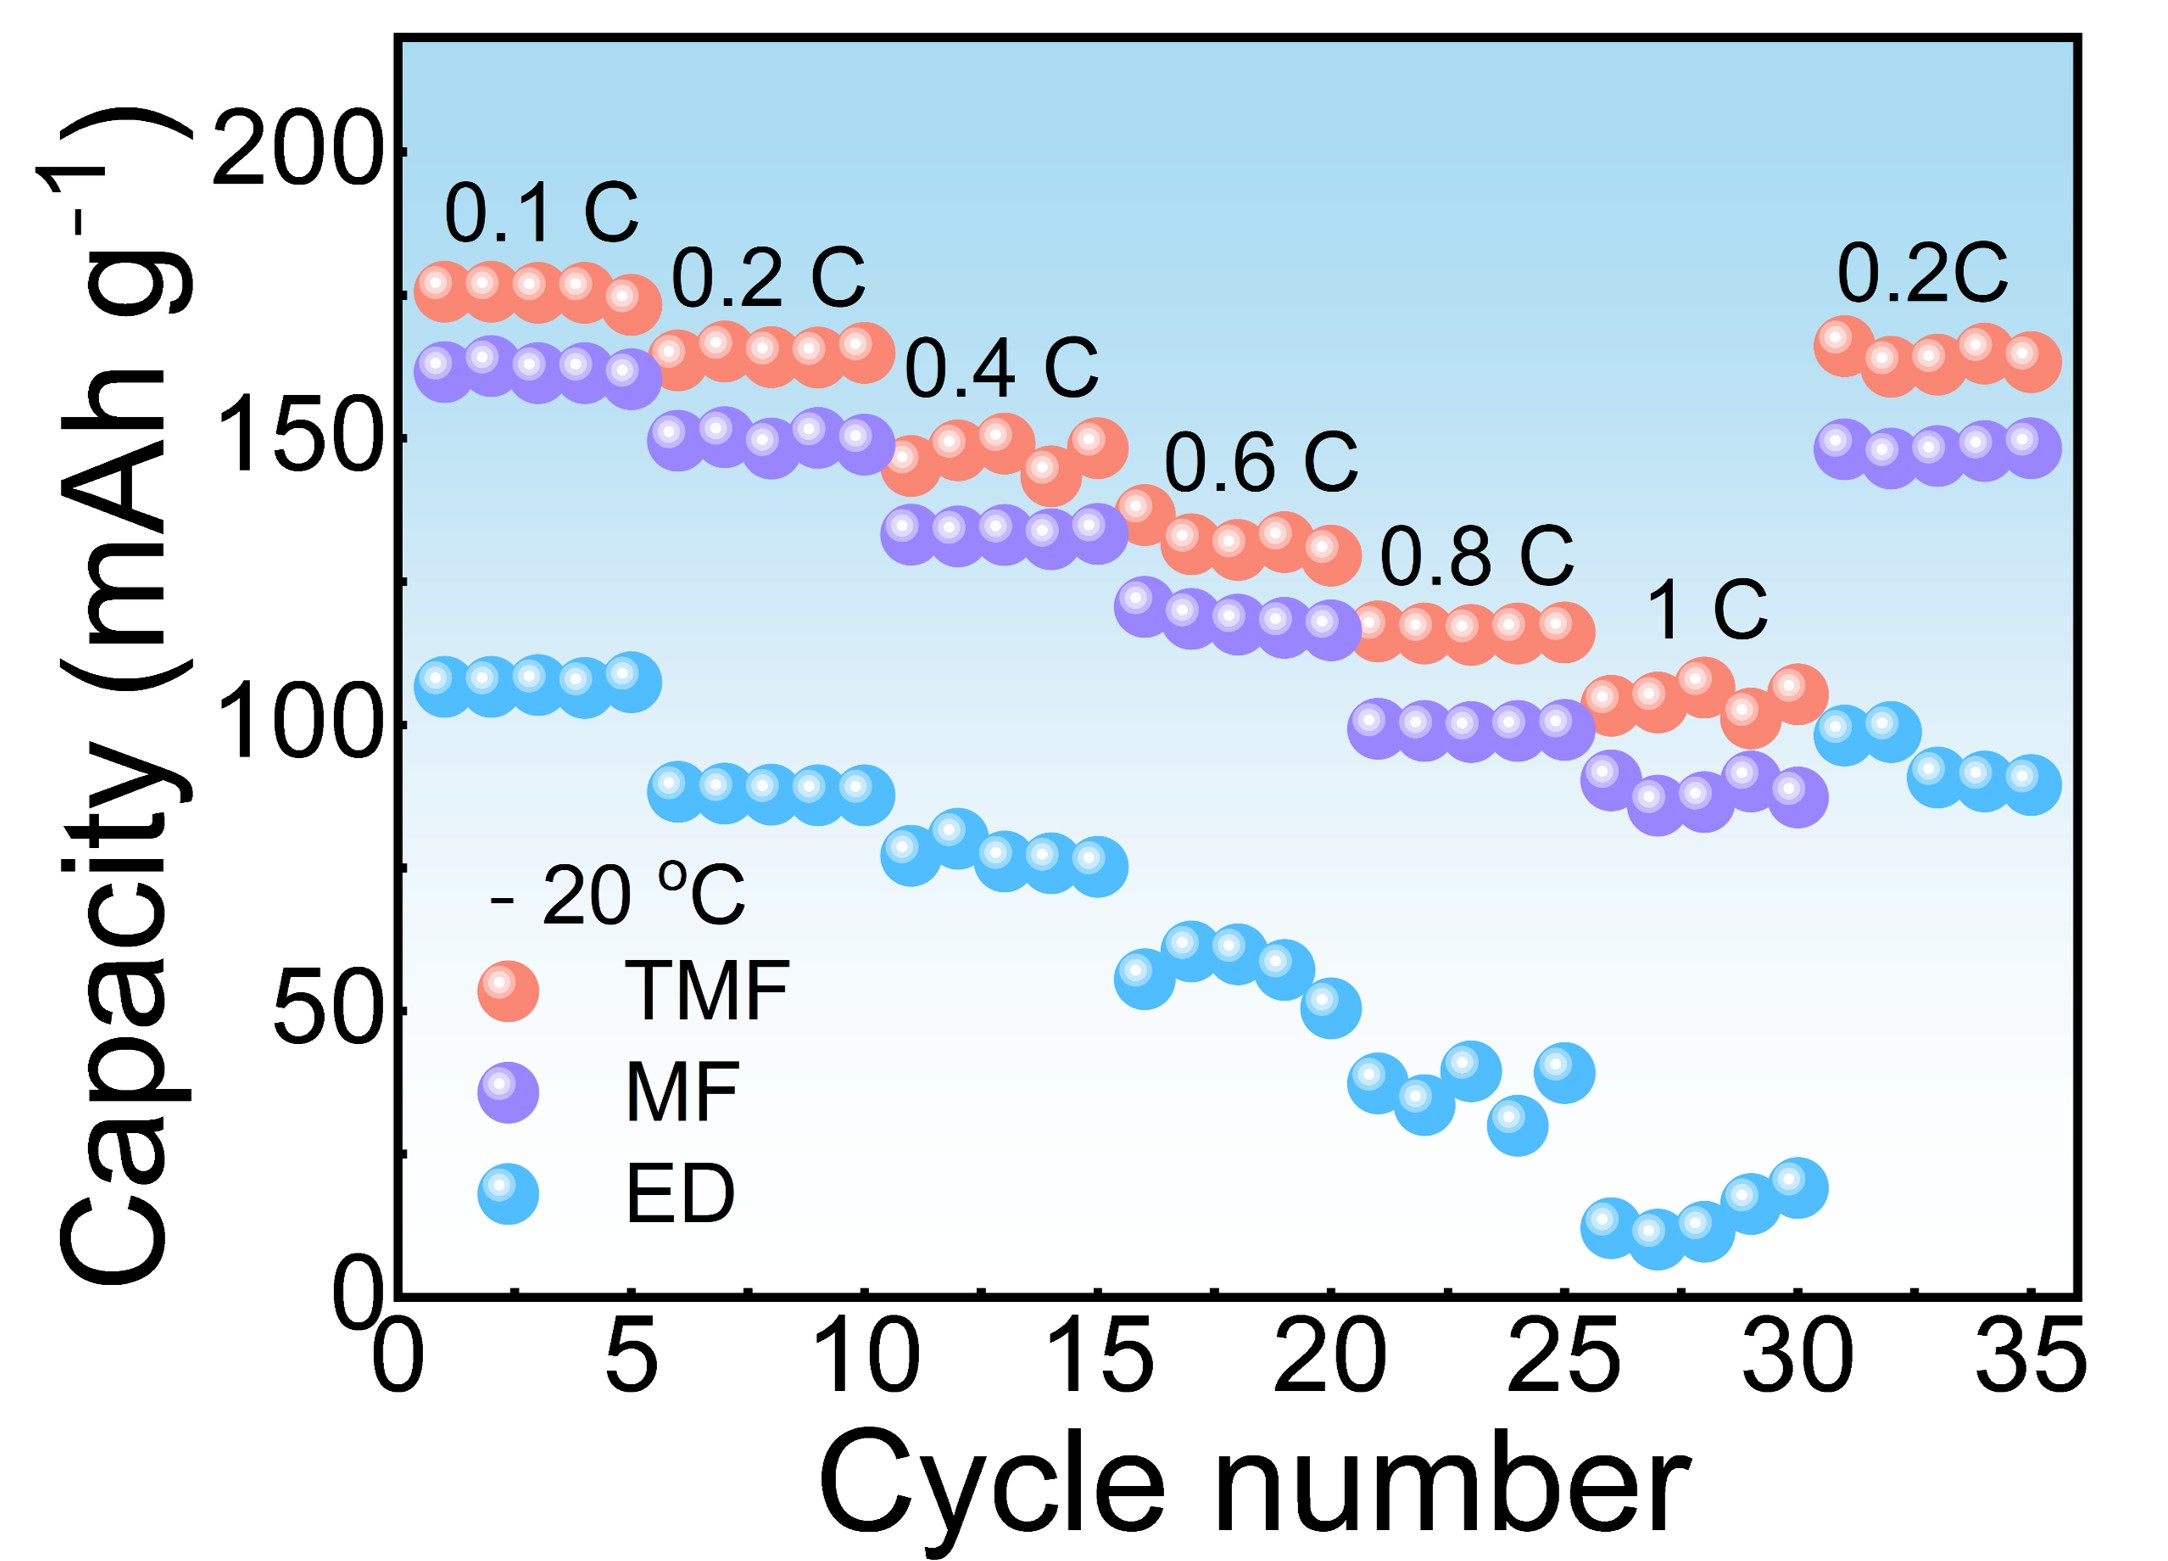


**Supplementary Fig.  24.** Rate capability of NMC811||Li cells with different electrolytes at -20 °C.


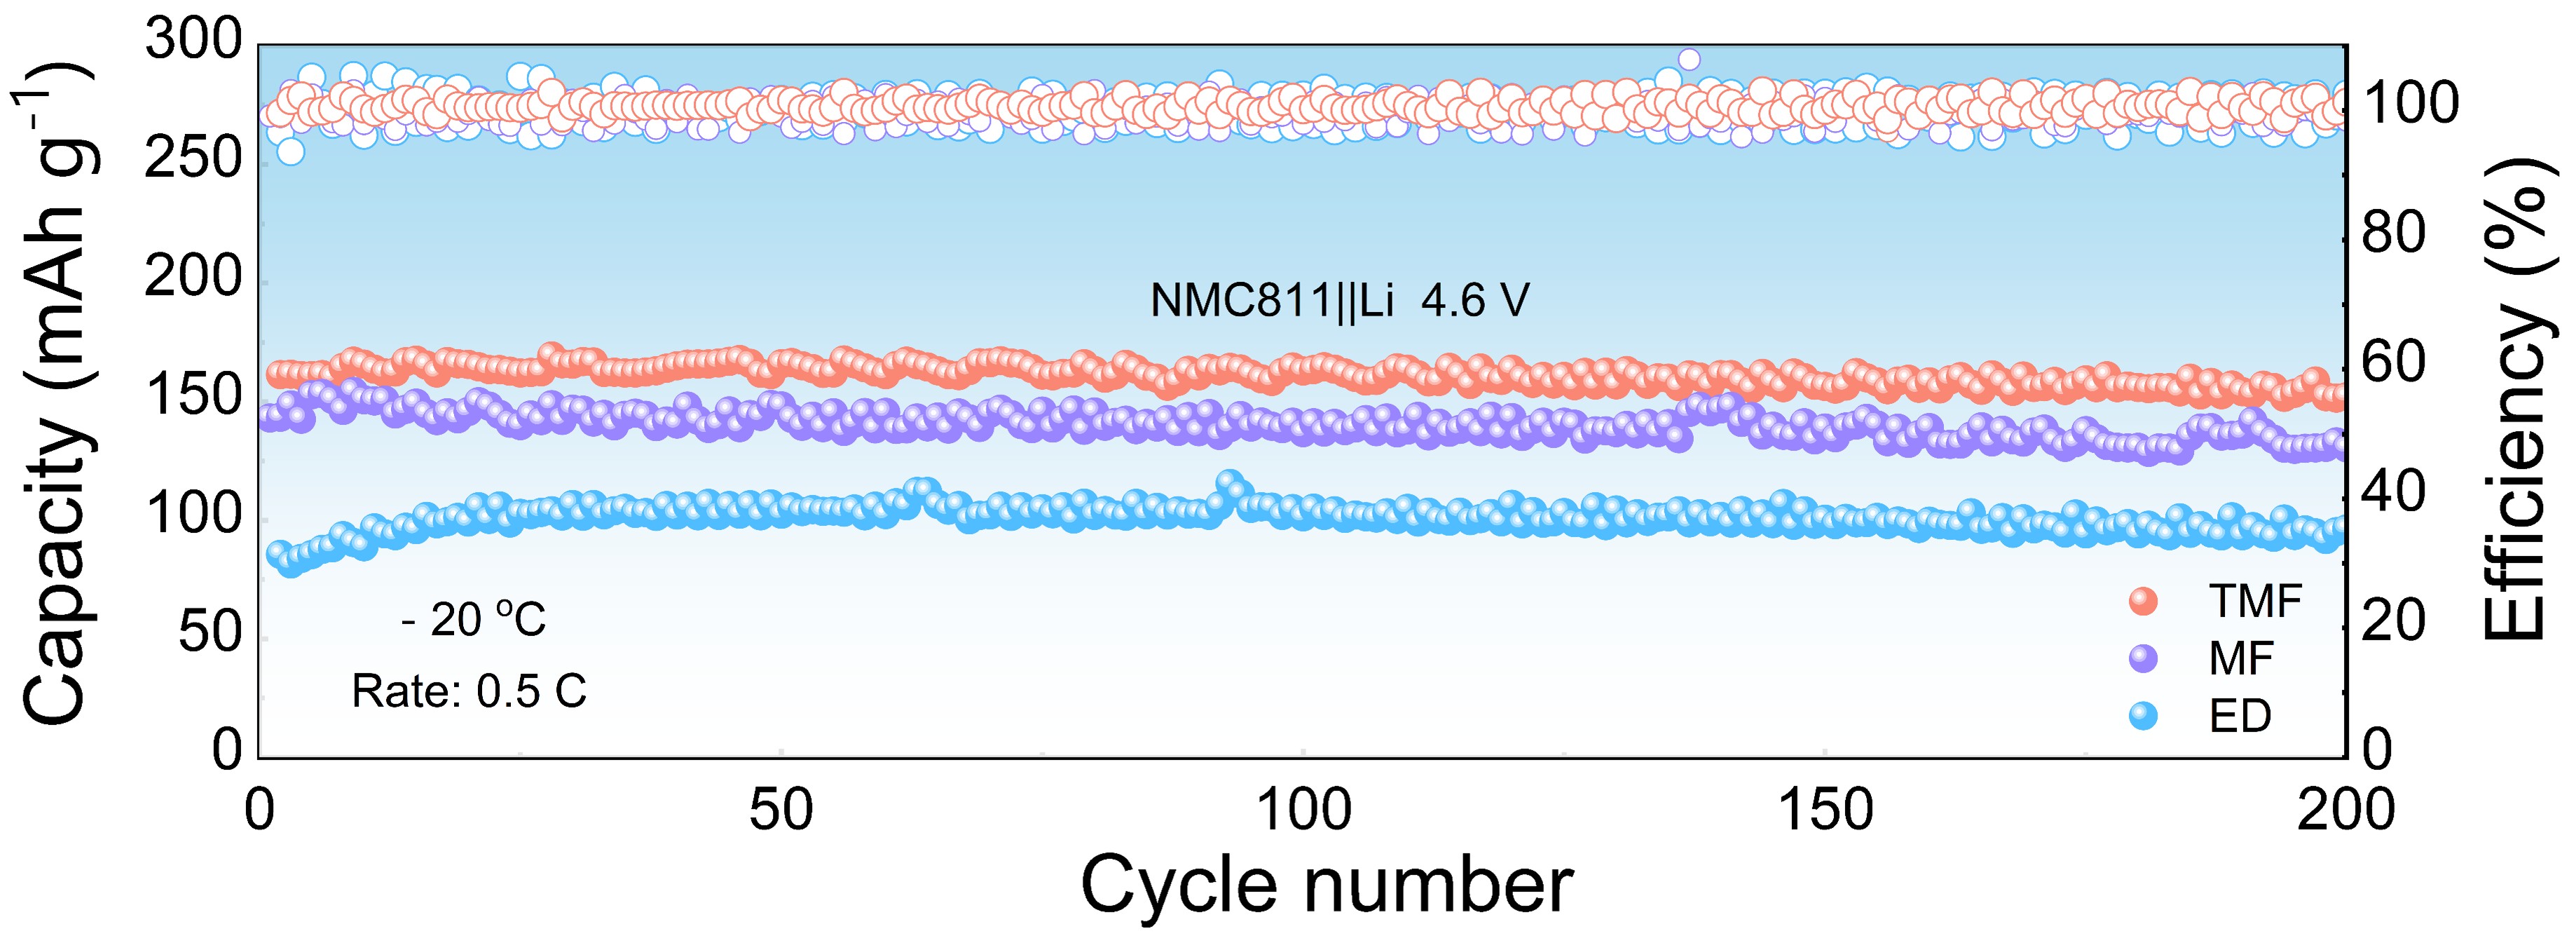


**Supplementary Fig.  25.** Cycling performance of NMC811||Li cells with different electrolytes at -20 °C and 4.6 V.


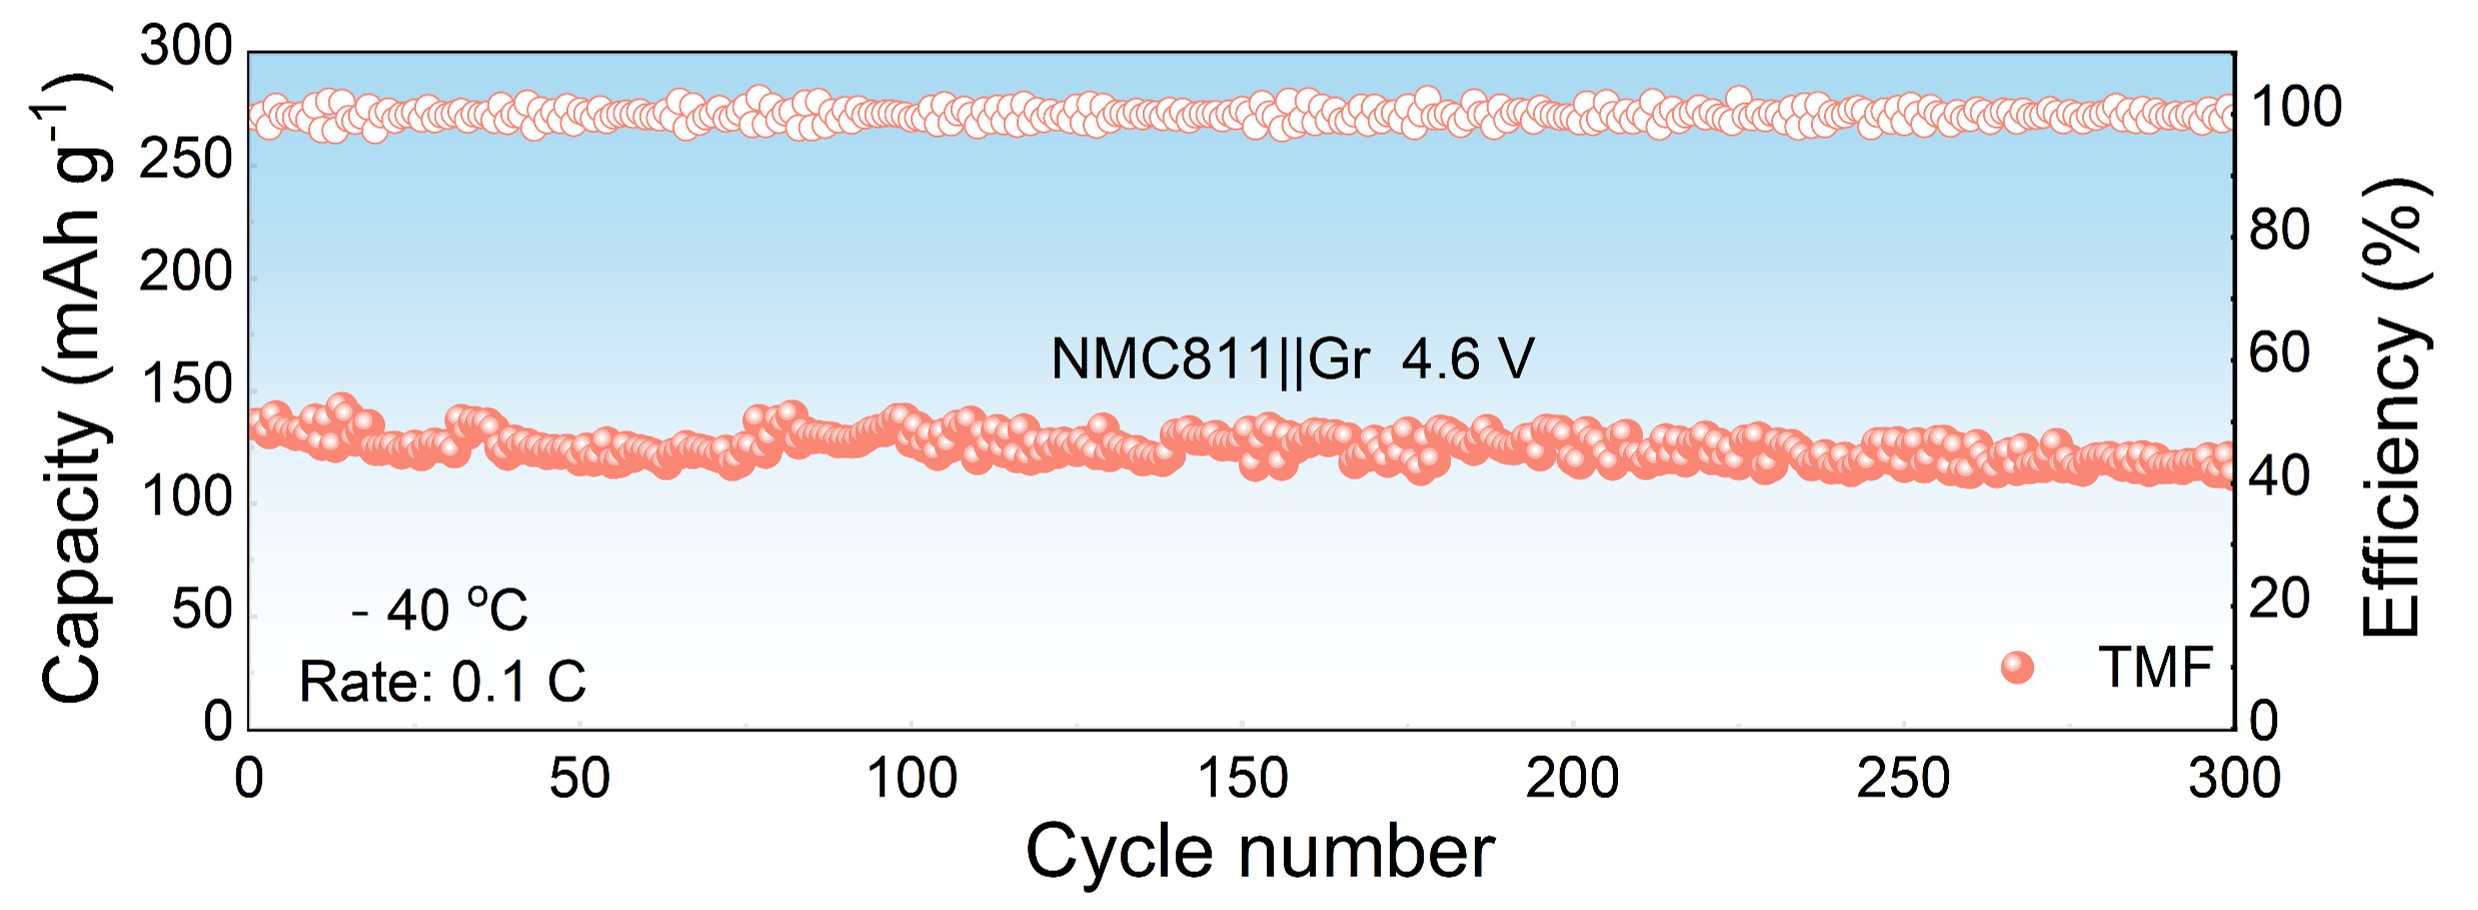


**Supplementary Fig.  26.** Cycling performance of NMC811||Gr cells with TMF electrolyte at -40 °C and 4.6 V.


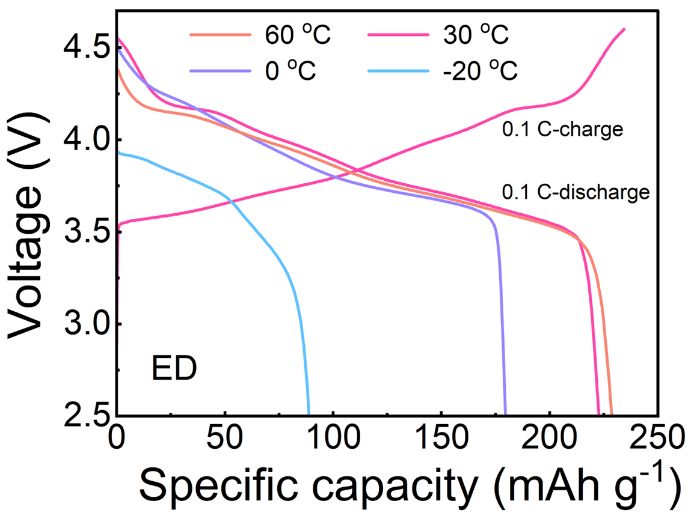


**Supplementary Fig.  27.** The discharge curves of the NMC811||Li battery using ED electrolyte at different temperatures.


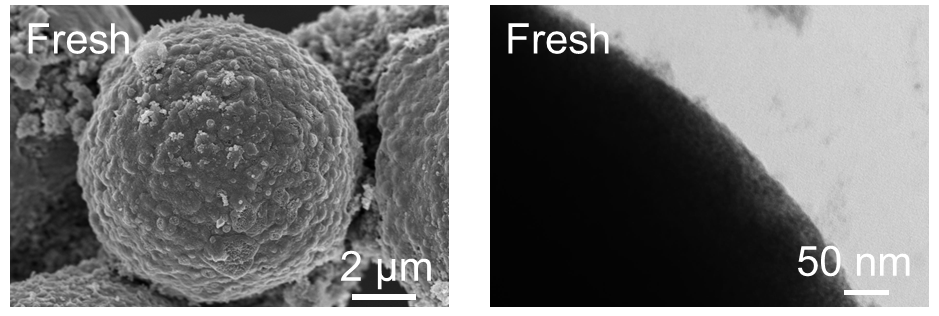


**Supplementary Fig.  28.** SEM and TEM images of the NMC811 cathode before cycling.


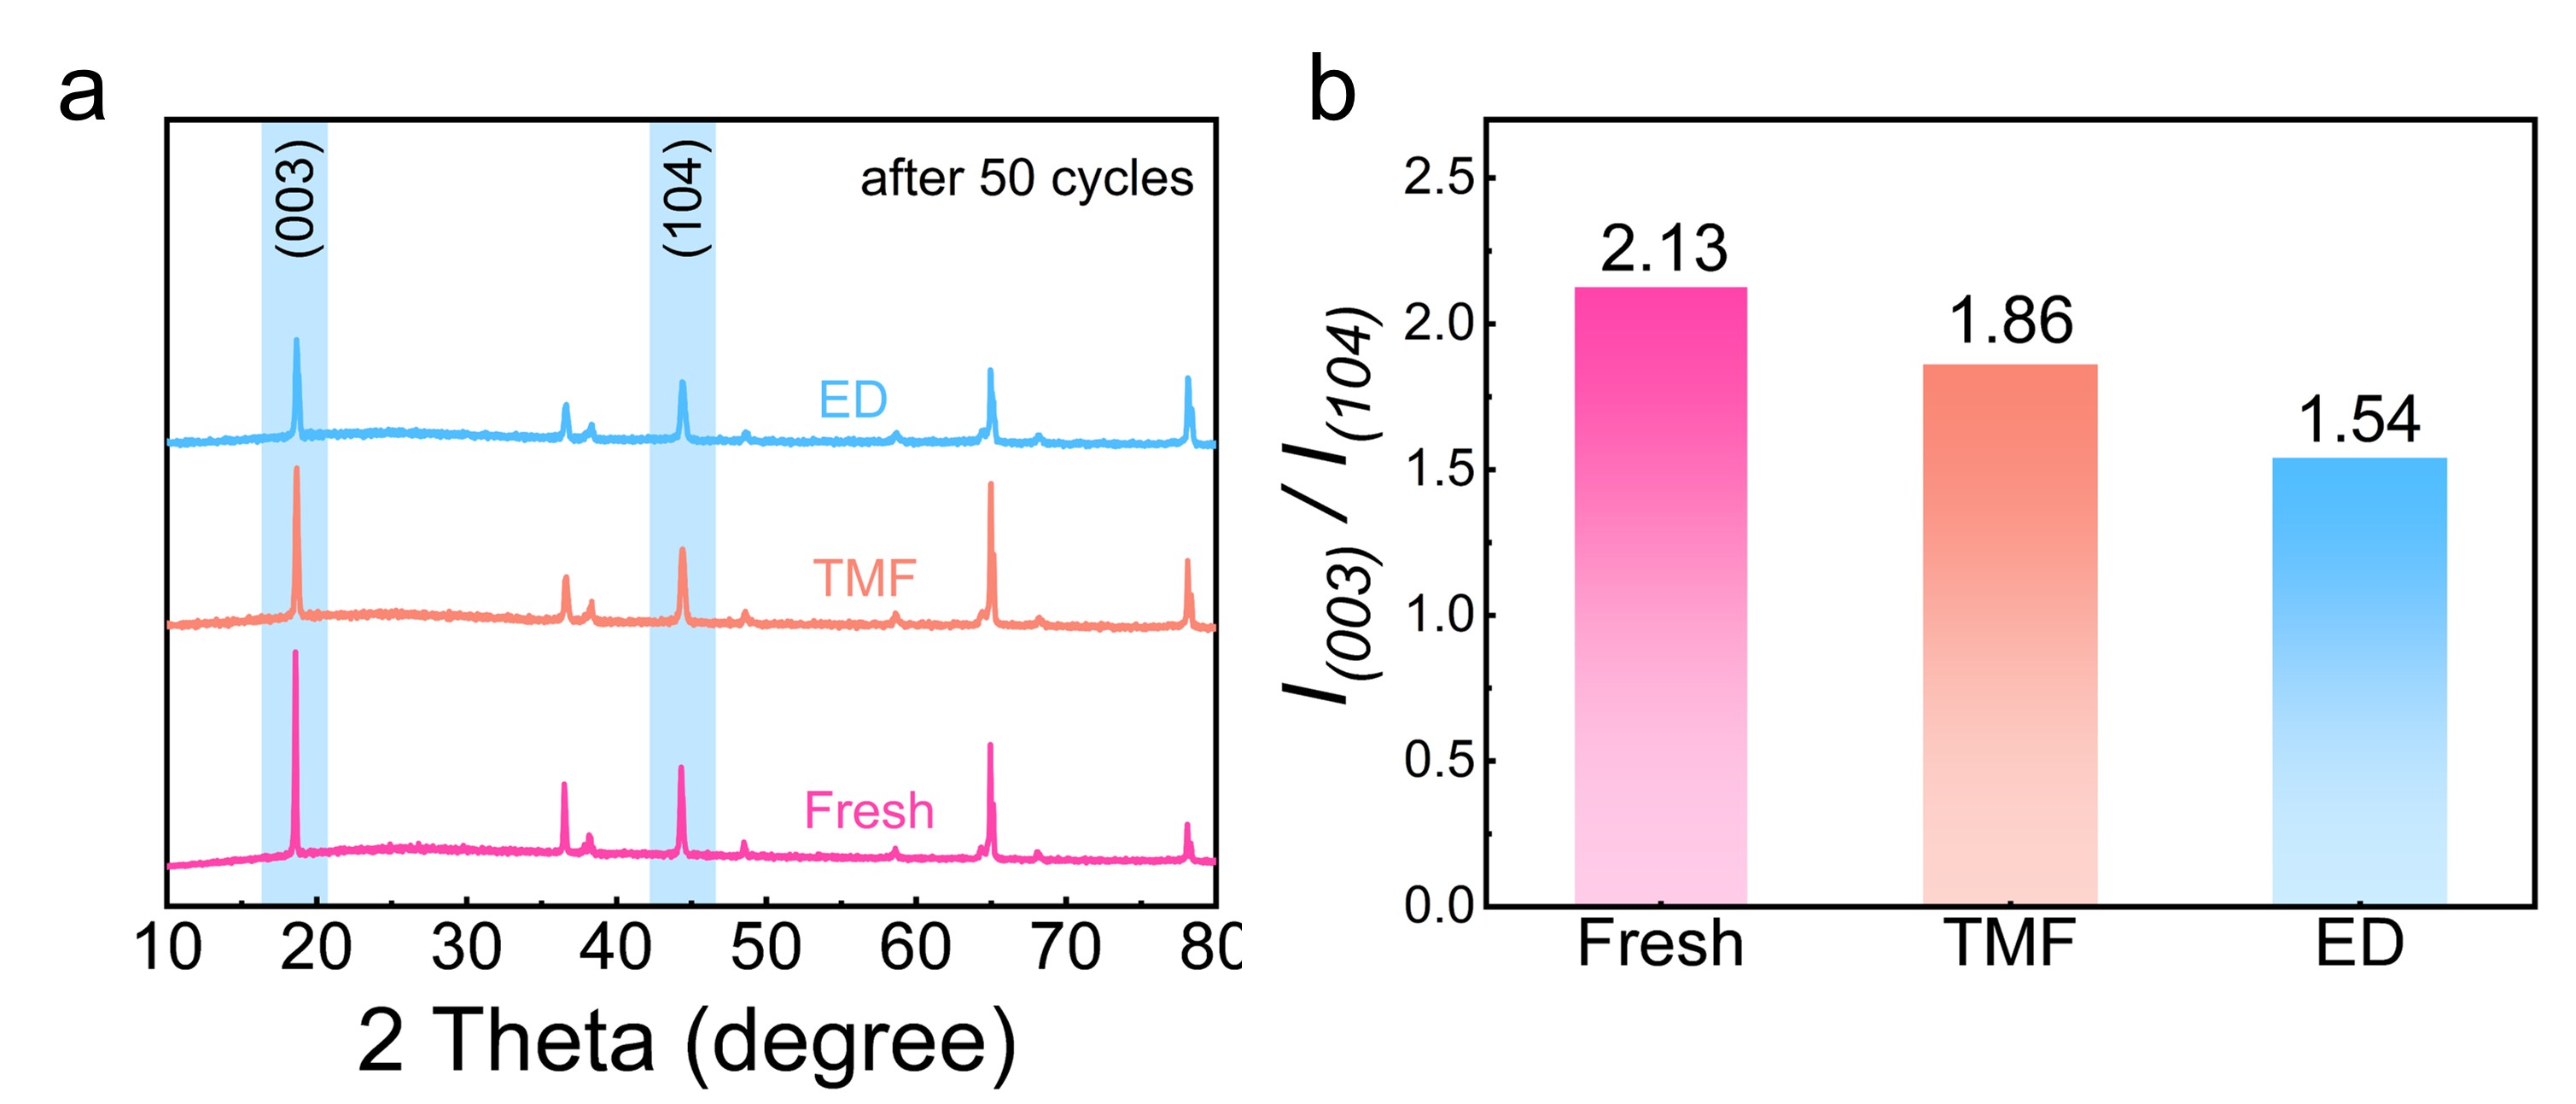


**Supplementary Fig.  29.** XRD patterns of NMC811 cathodes before cycling and after cycling with TMF and ED electrolytes, along with the ratio of *I* (003)/*I* (104) in the XRD patterns.

**
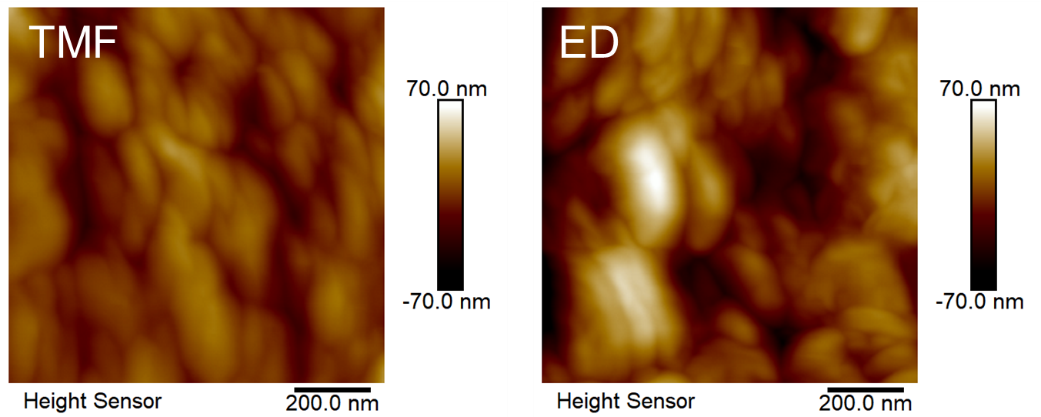
**

**Supplementary Fig.  30.** 2D AFM images of the NMC811 cathode after cycling in different electrolytes.


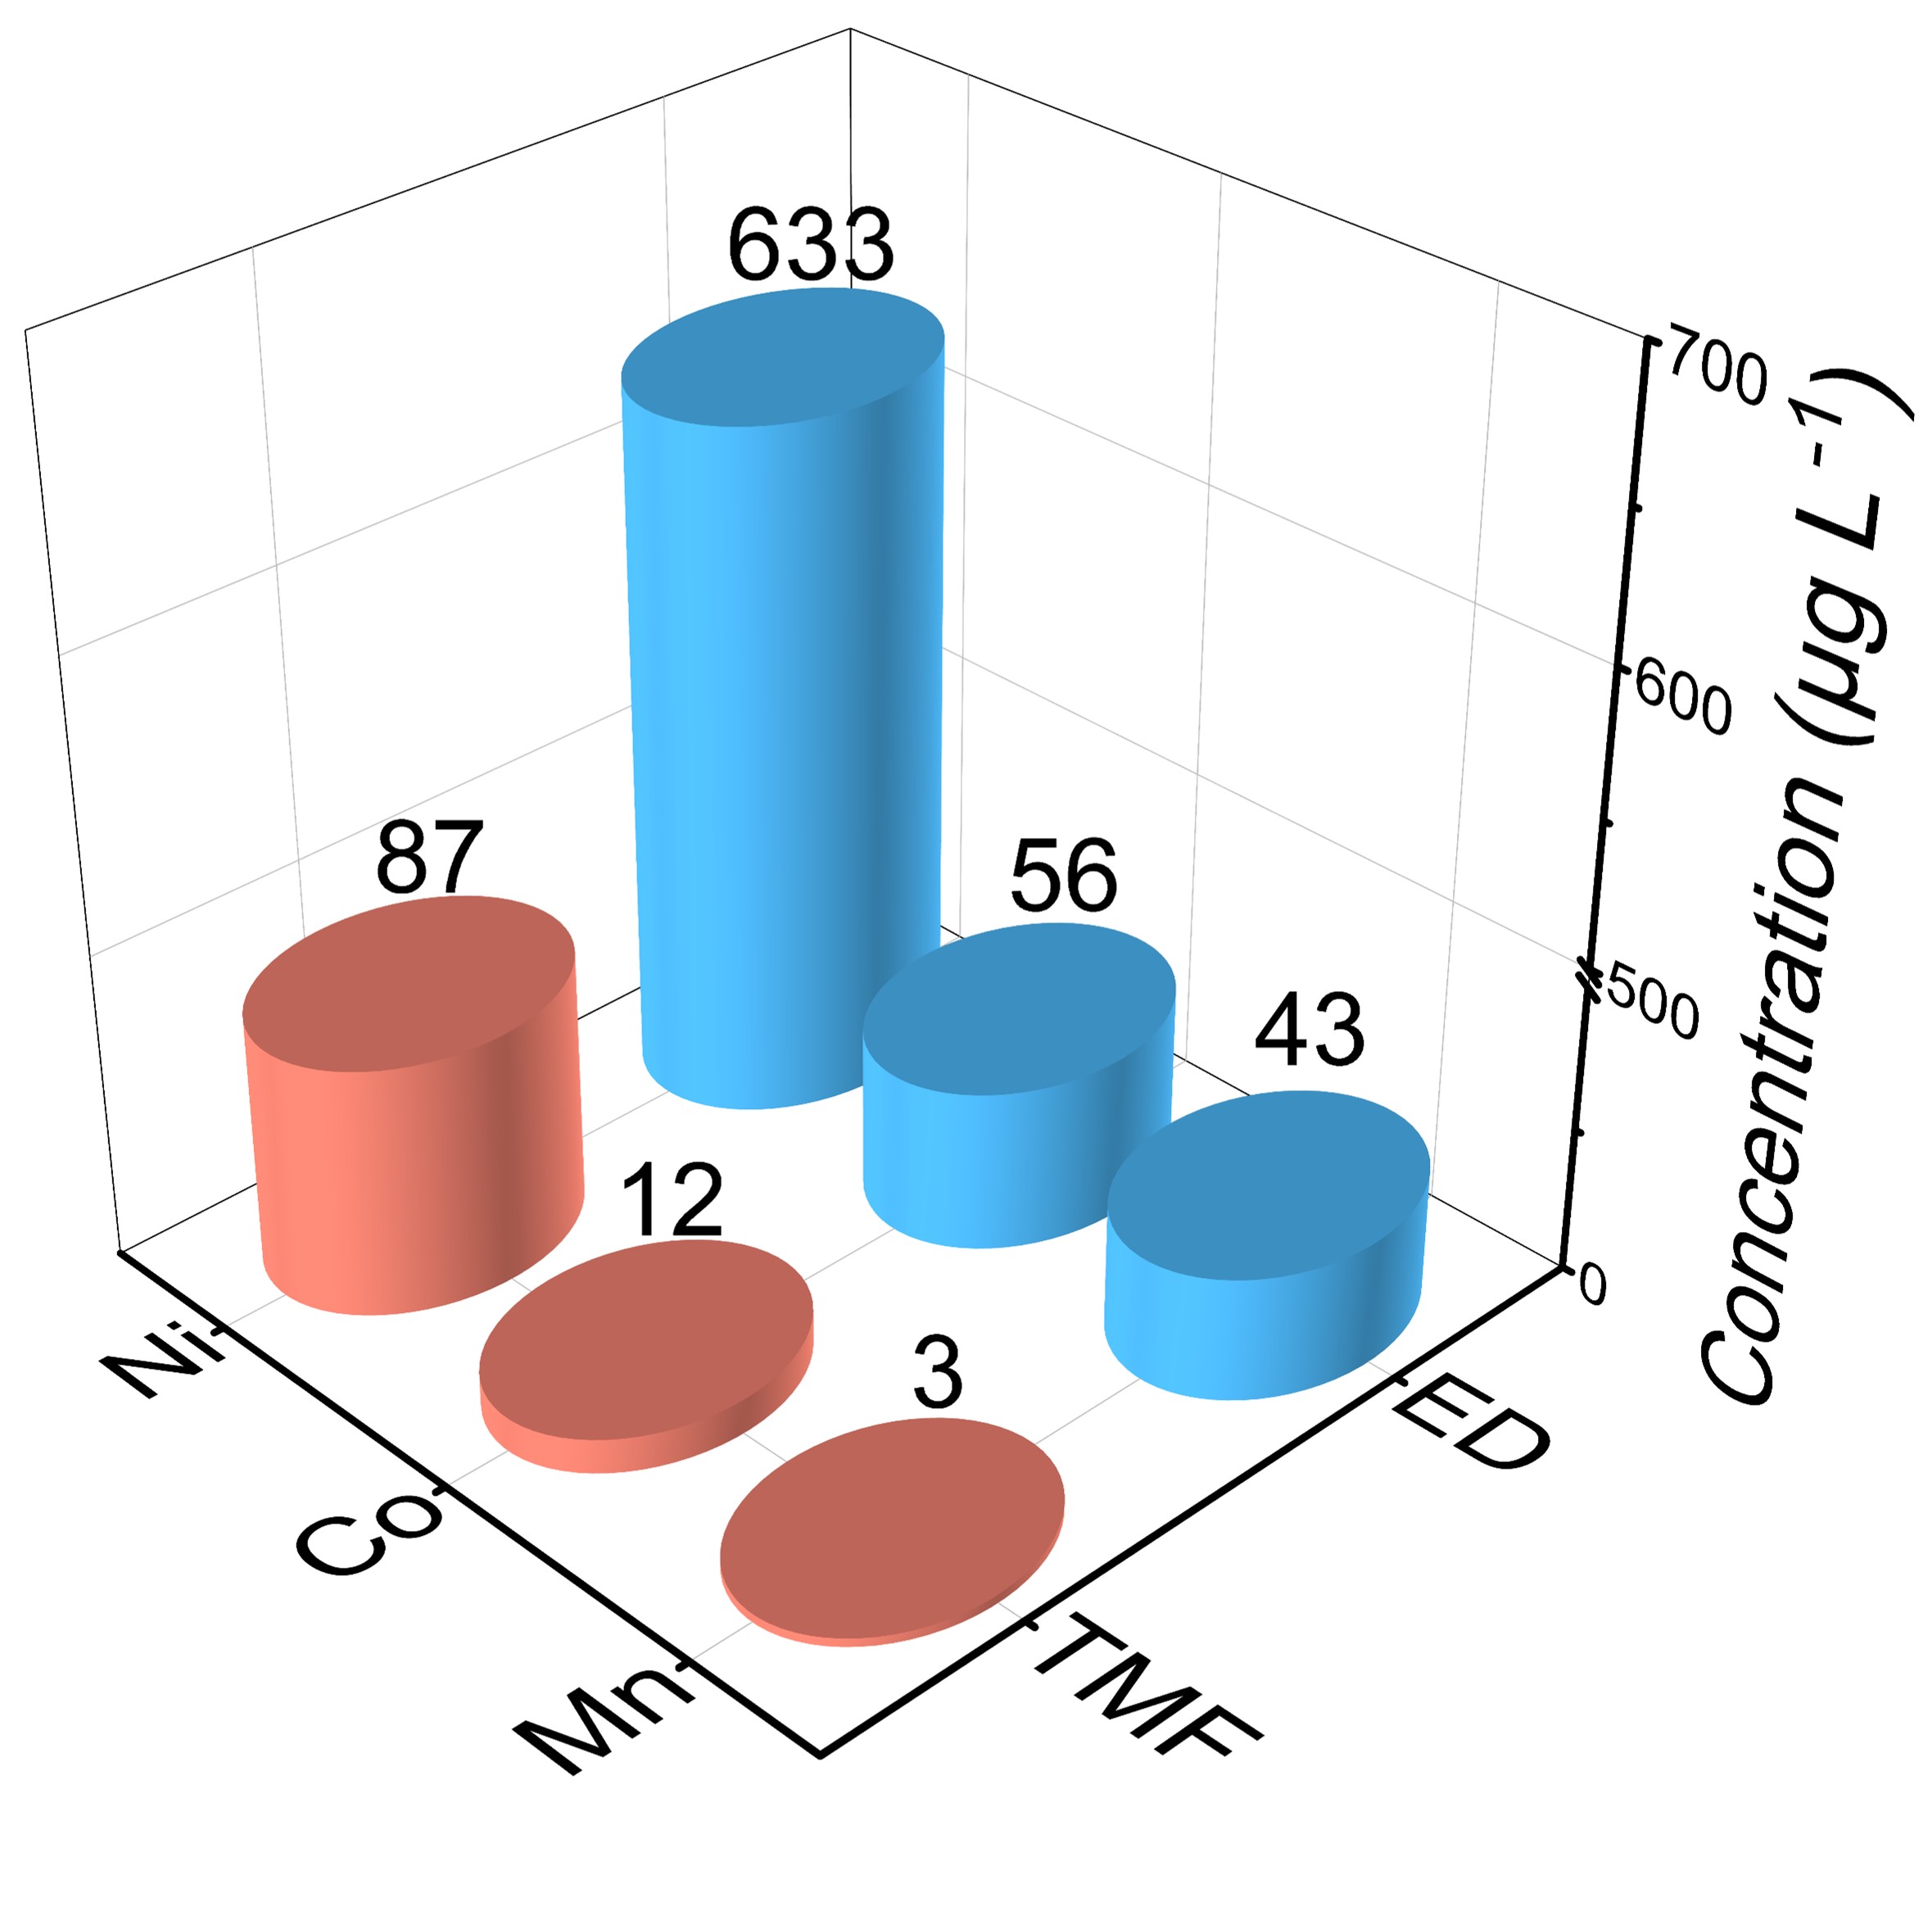


**Supplementary Fig.  31.** Dissolution of metals (Ni, Co, Mn) from the NMC811 cathode cycled in different electrolytes.


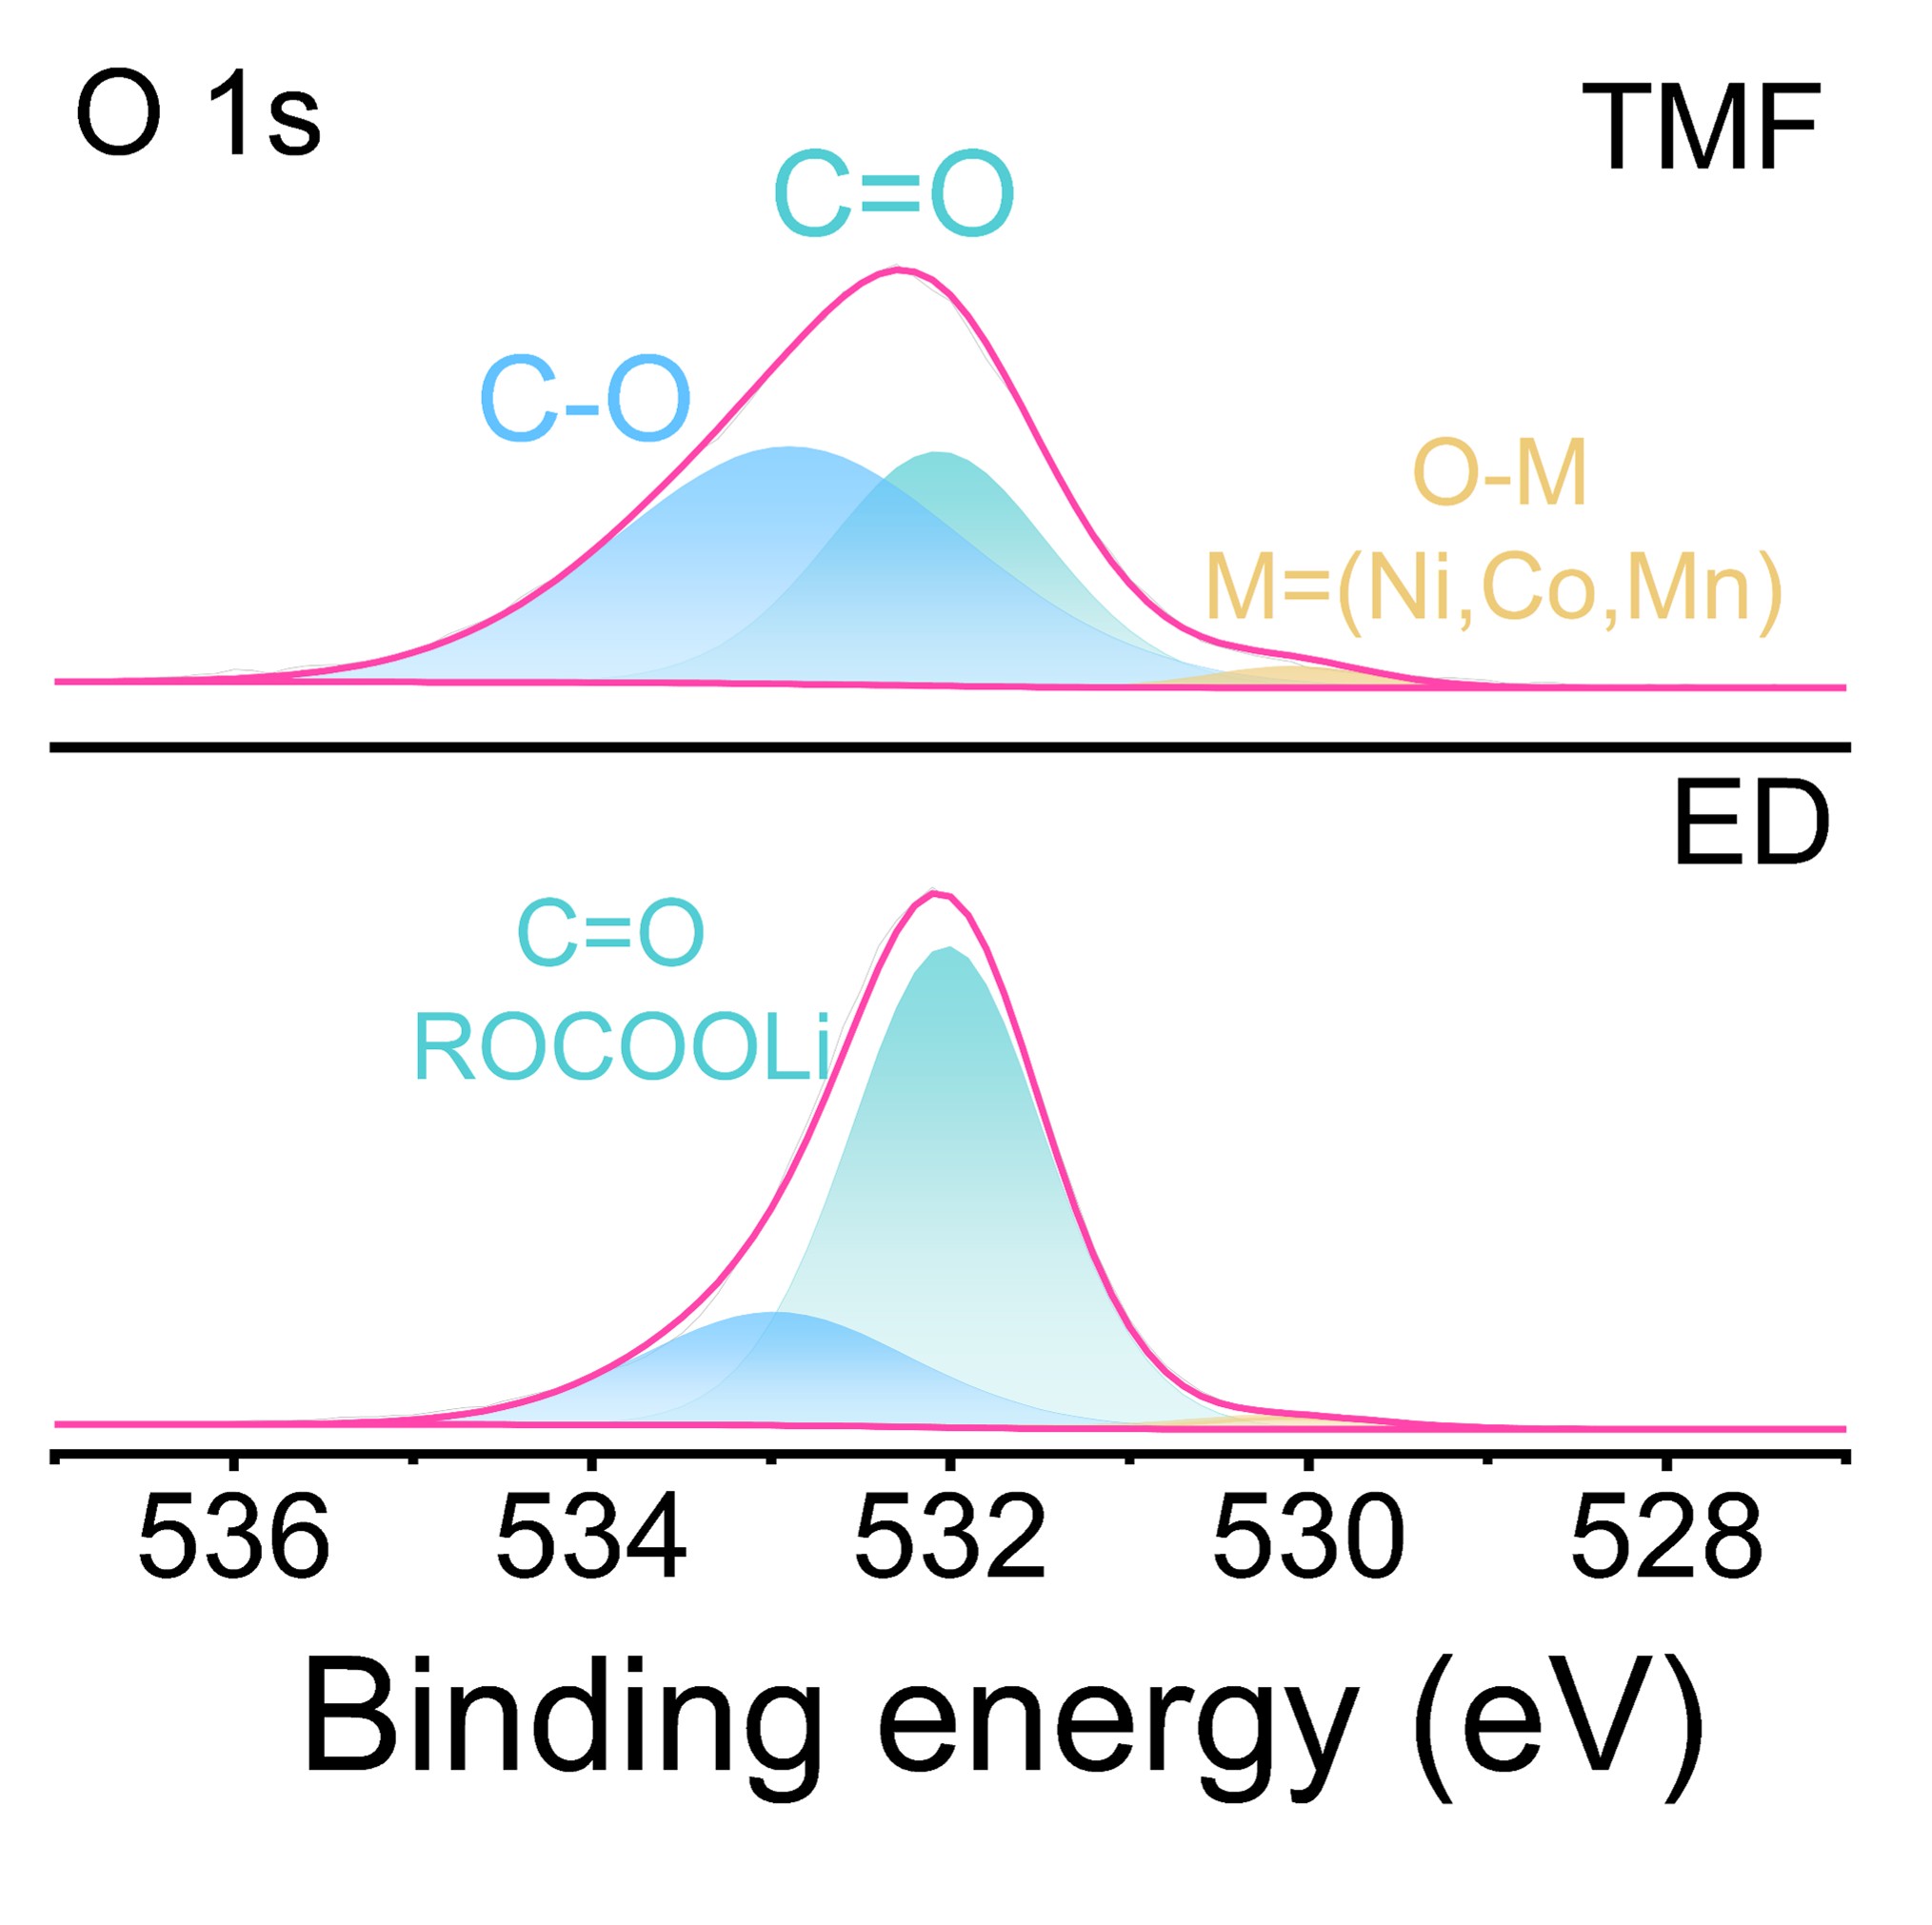


**Supplementary Fig.  32.** XPS O 1s spectra of the NMC811 cathodes after cycling with TMF and ED electrolytes.

**
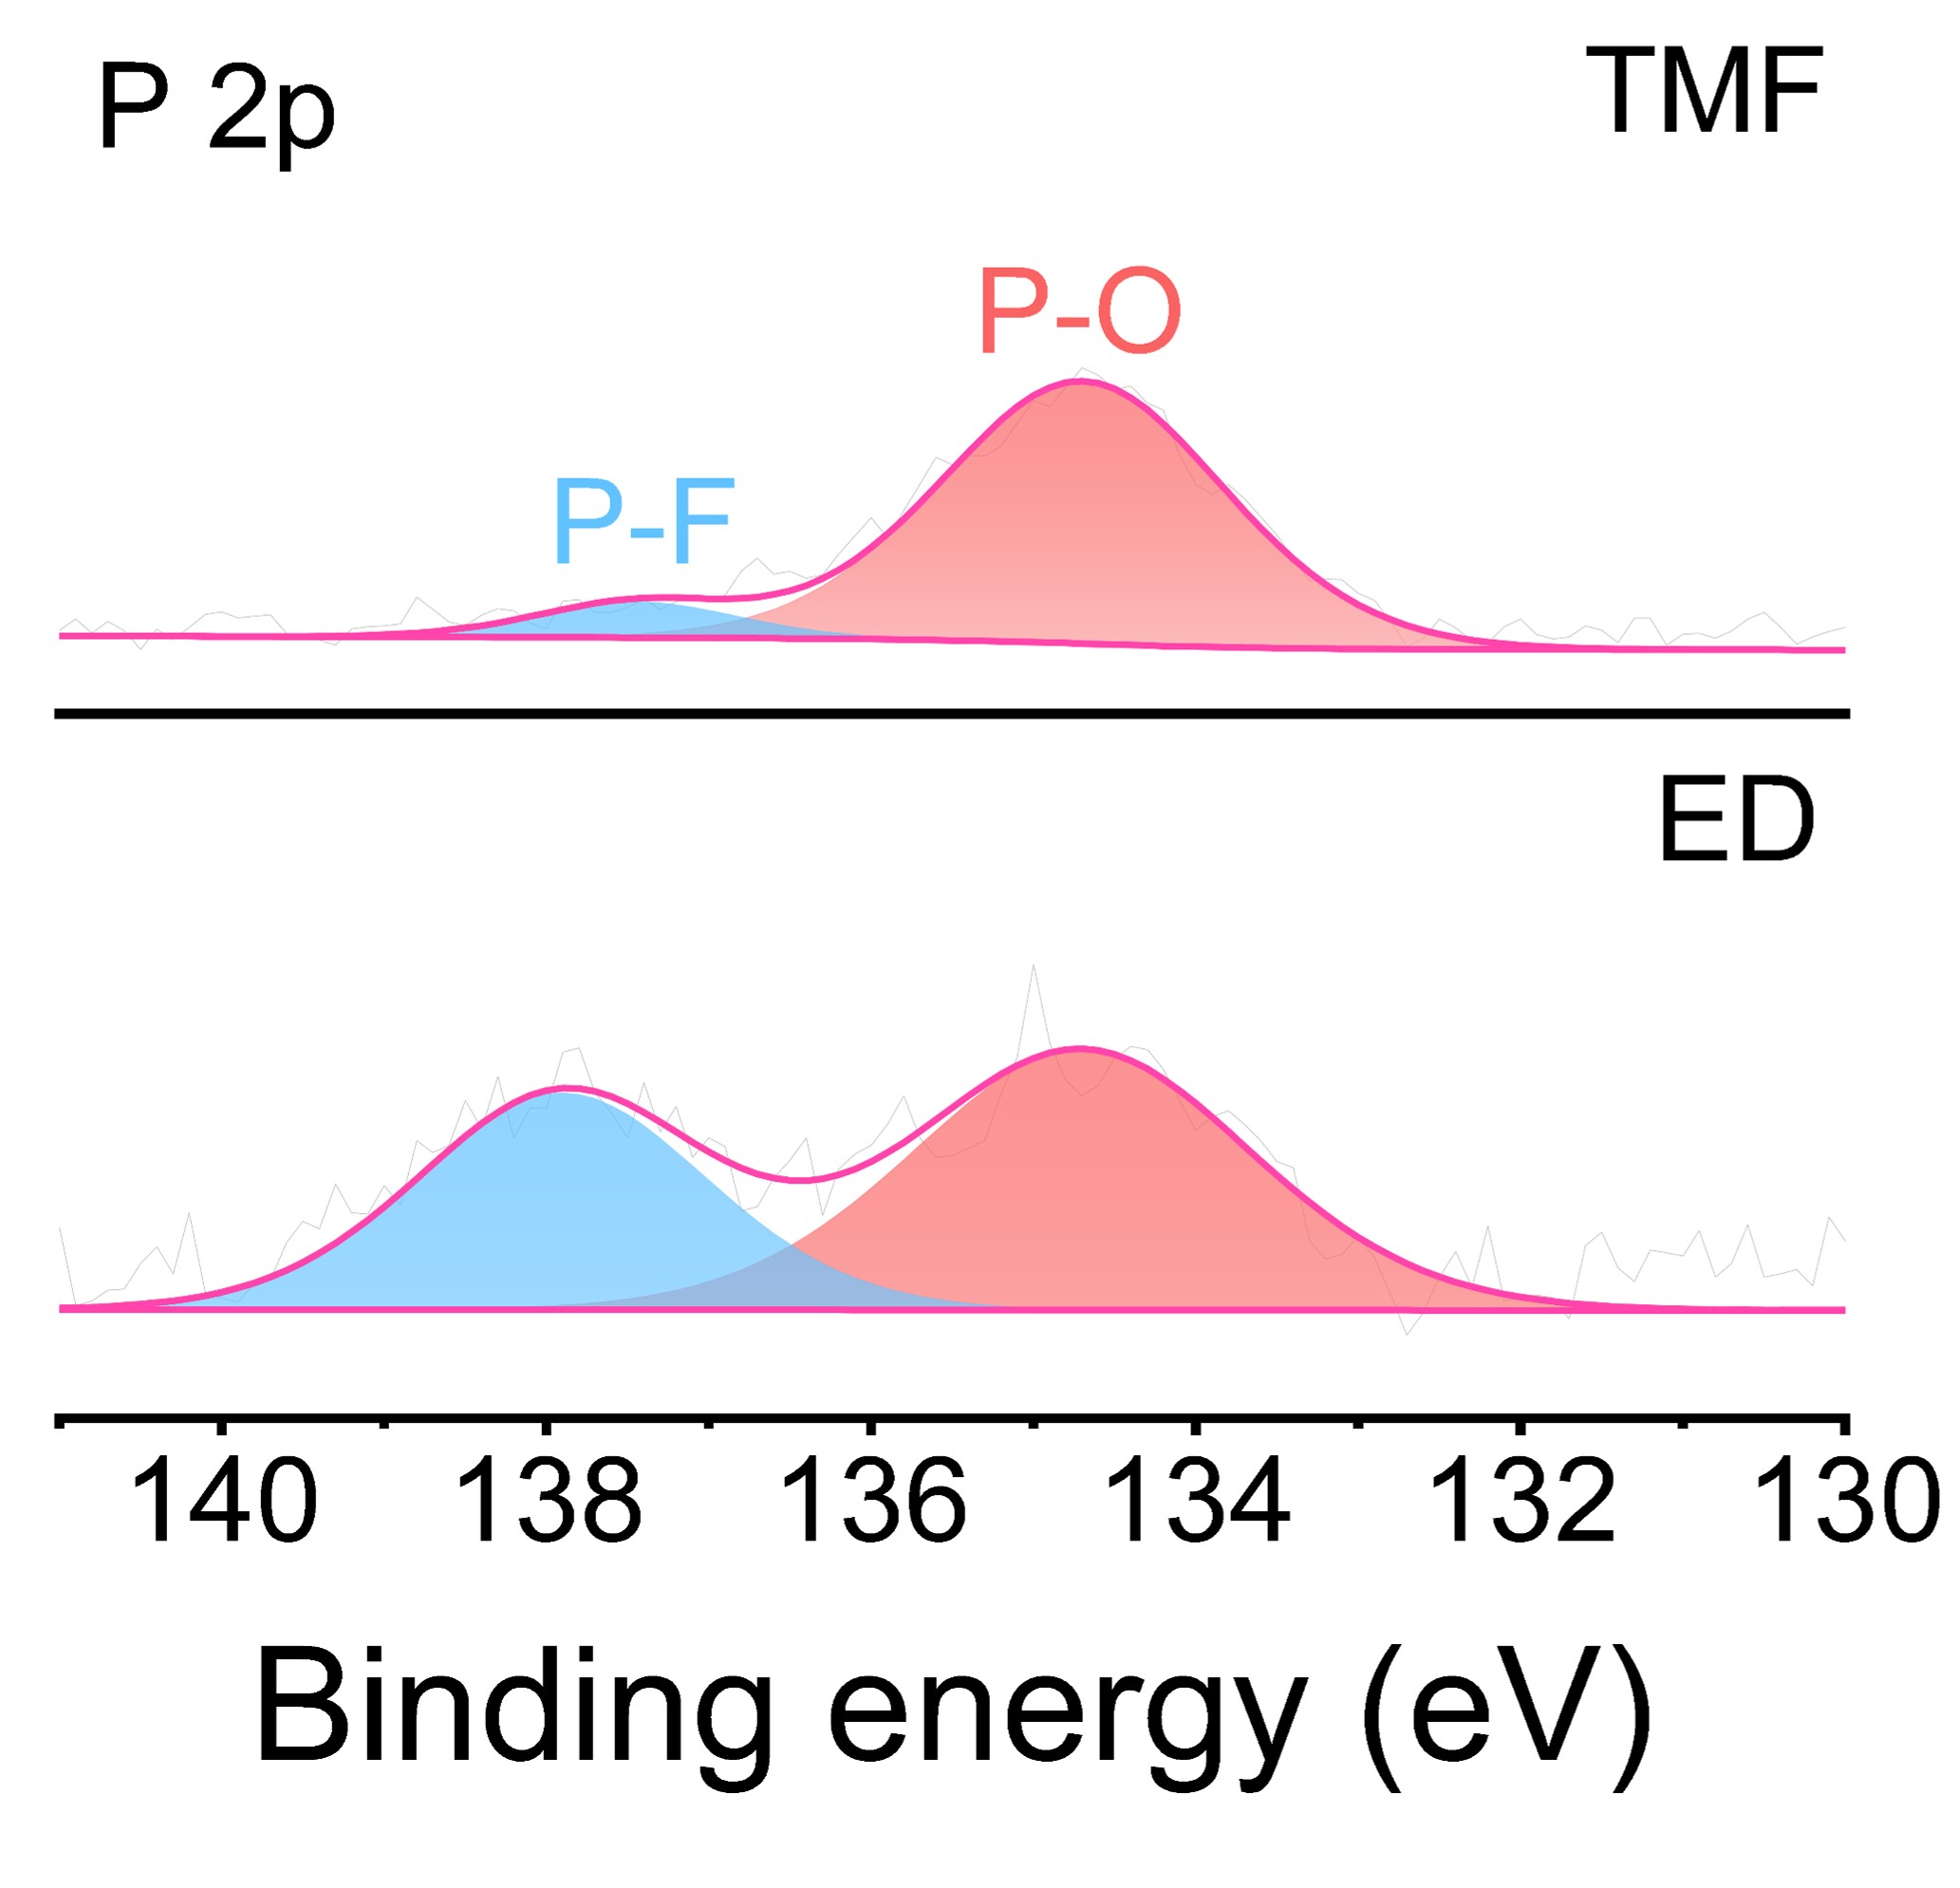
**

**Supplementary Fig.  33.** XPS P 2p spectra of the NMC811 cathodes after cycling with TMF and ED electrolytes.


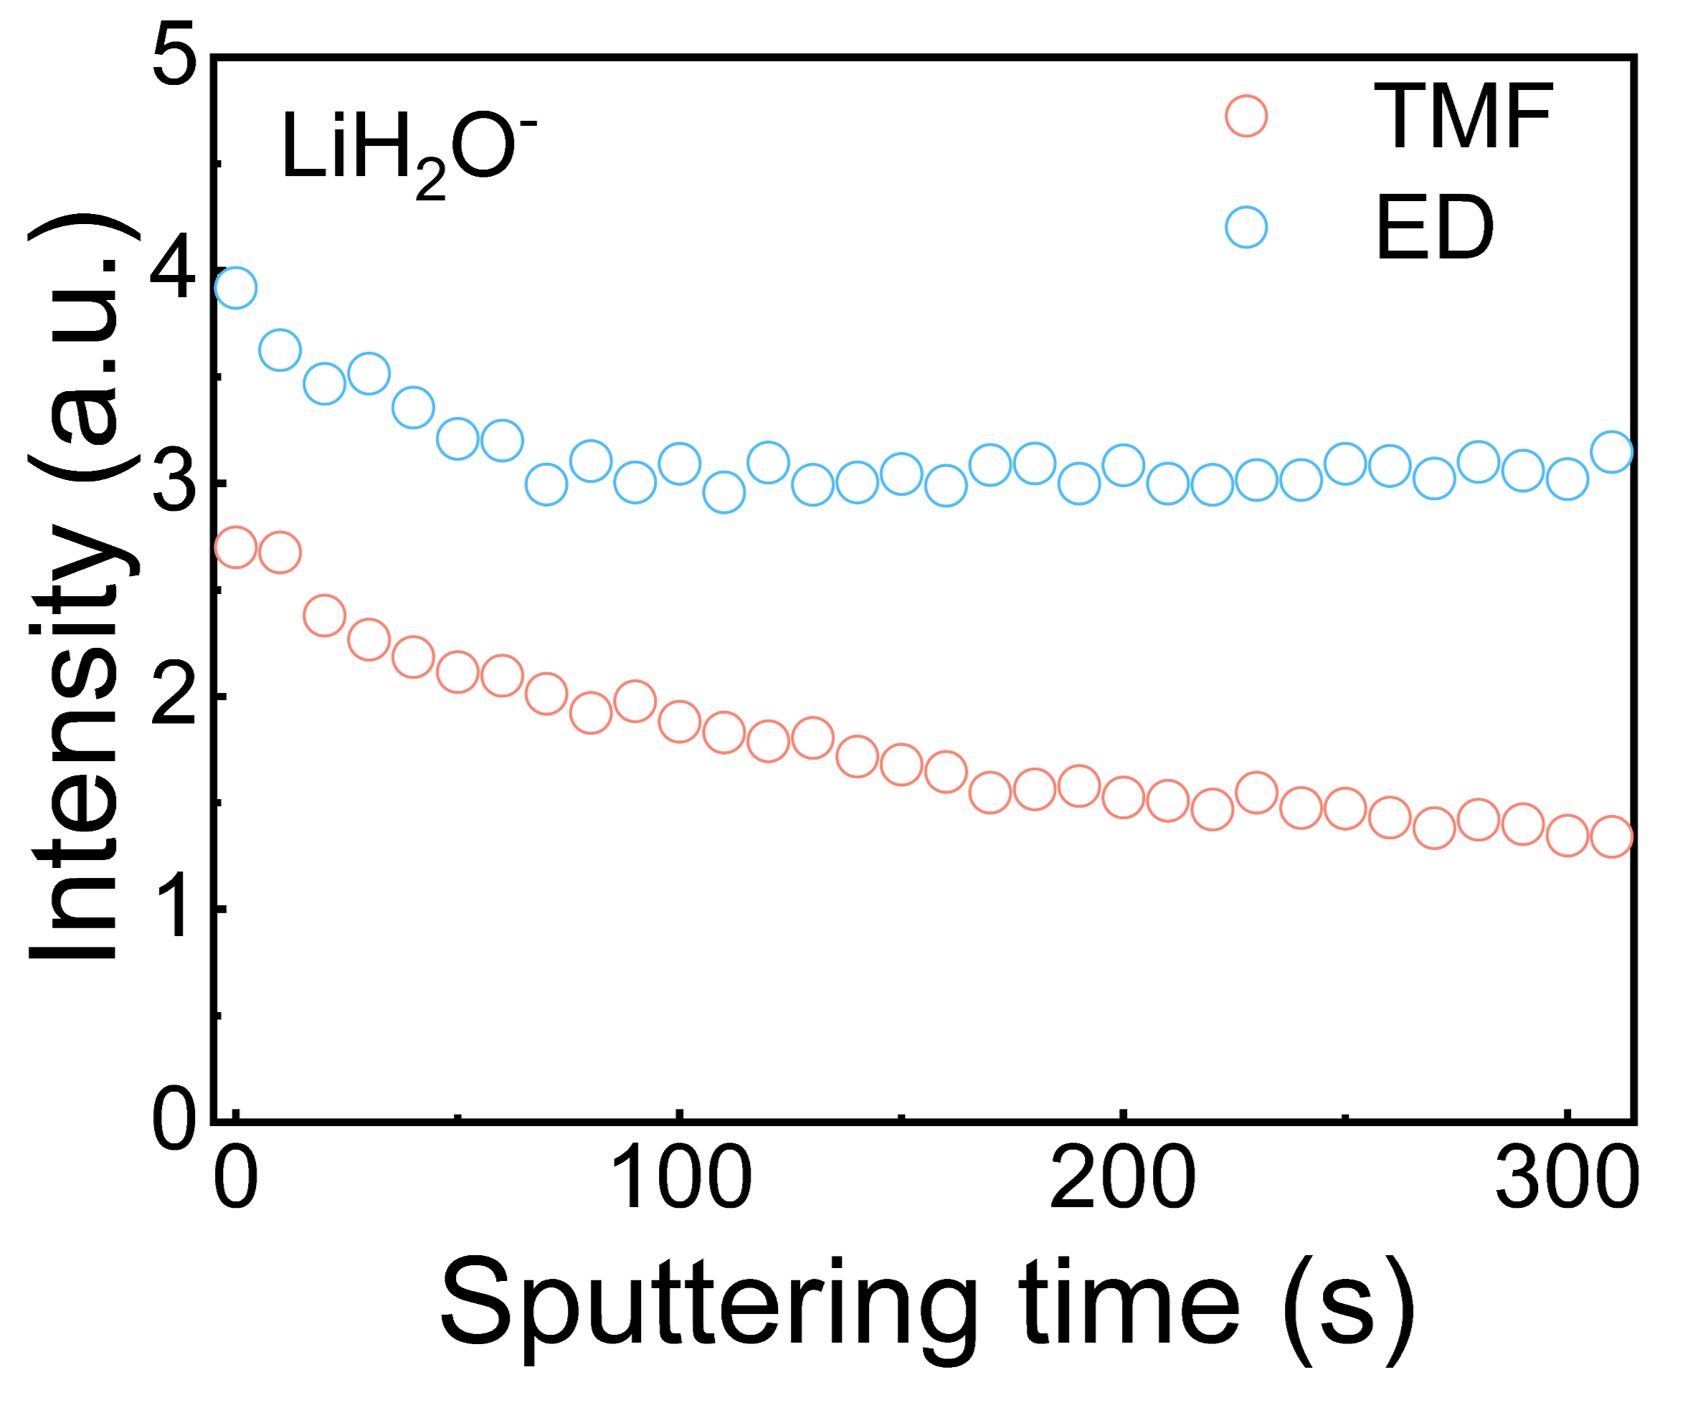


**Supplementary Fig.  34.** ToF-SIMS depth profiles of LiH2O- species in the CEI formed in different electrolytes.


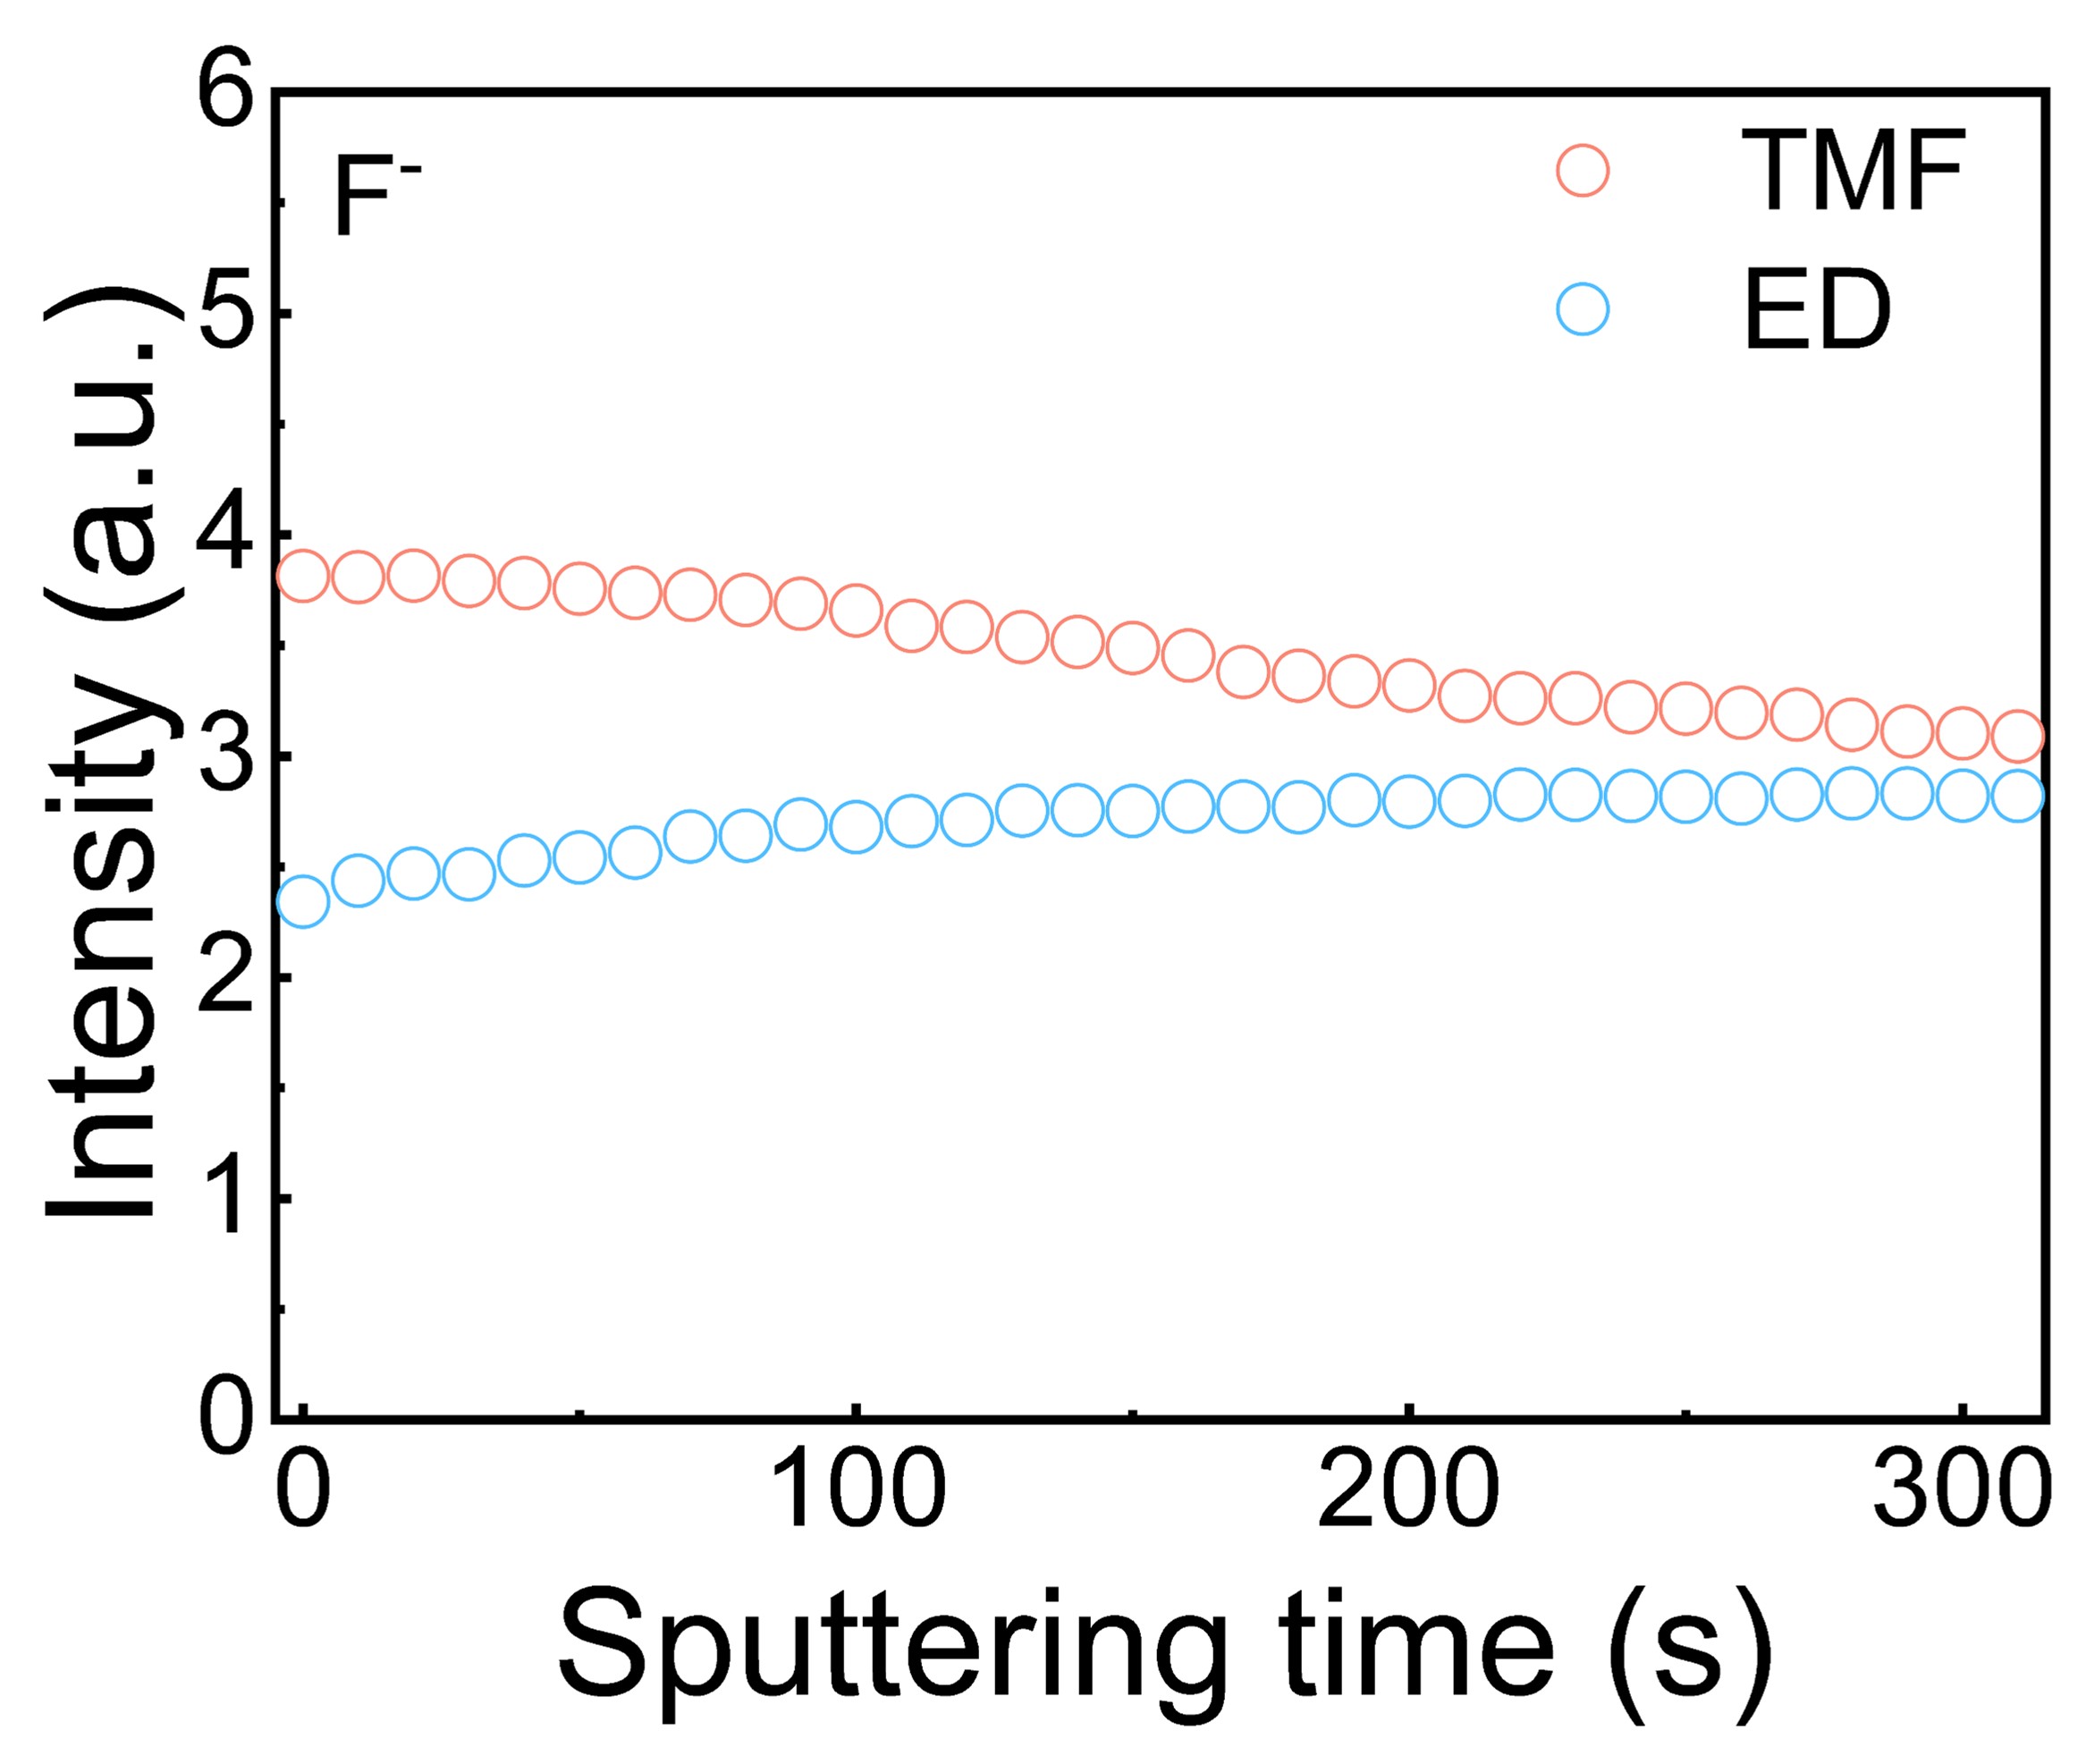


**Supplementary Fig.  35.** ToF-SIMS depth profiles of F- species in the CEI formed in different electrolytes.


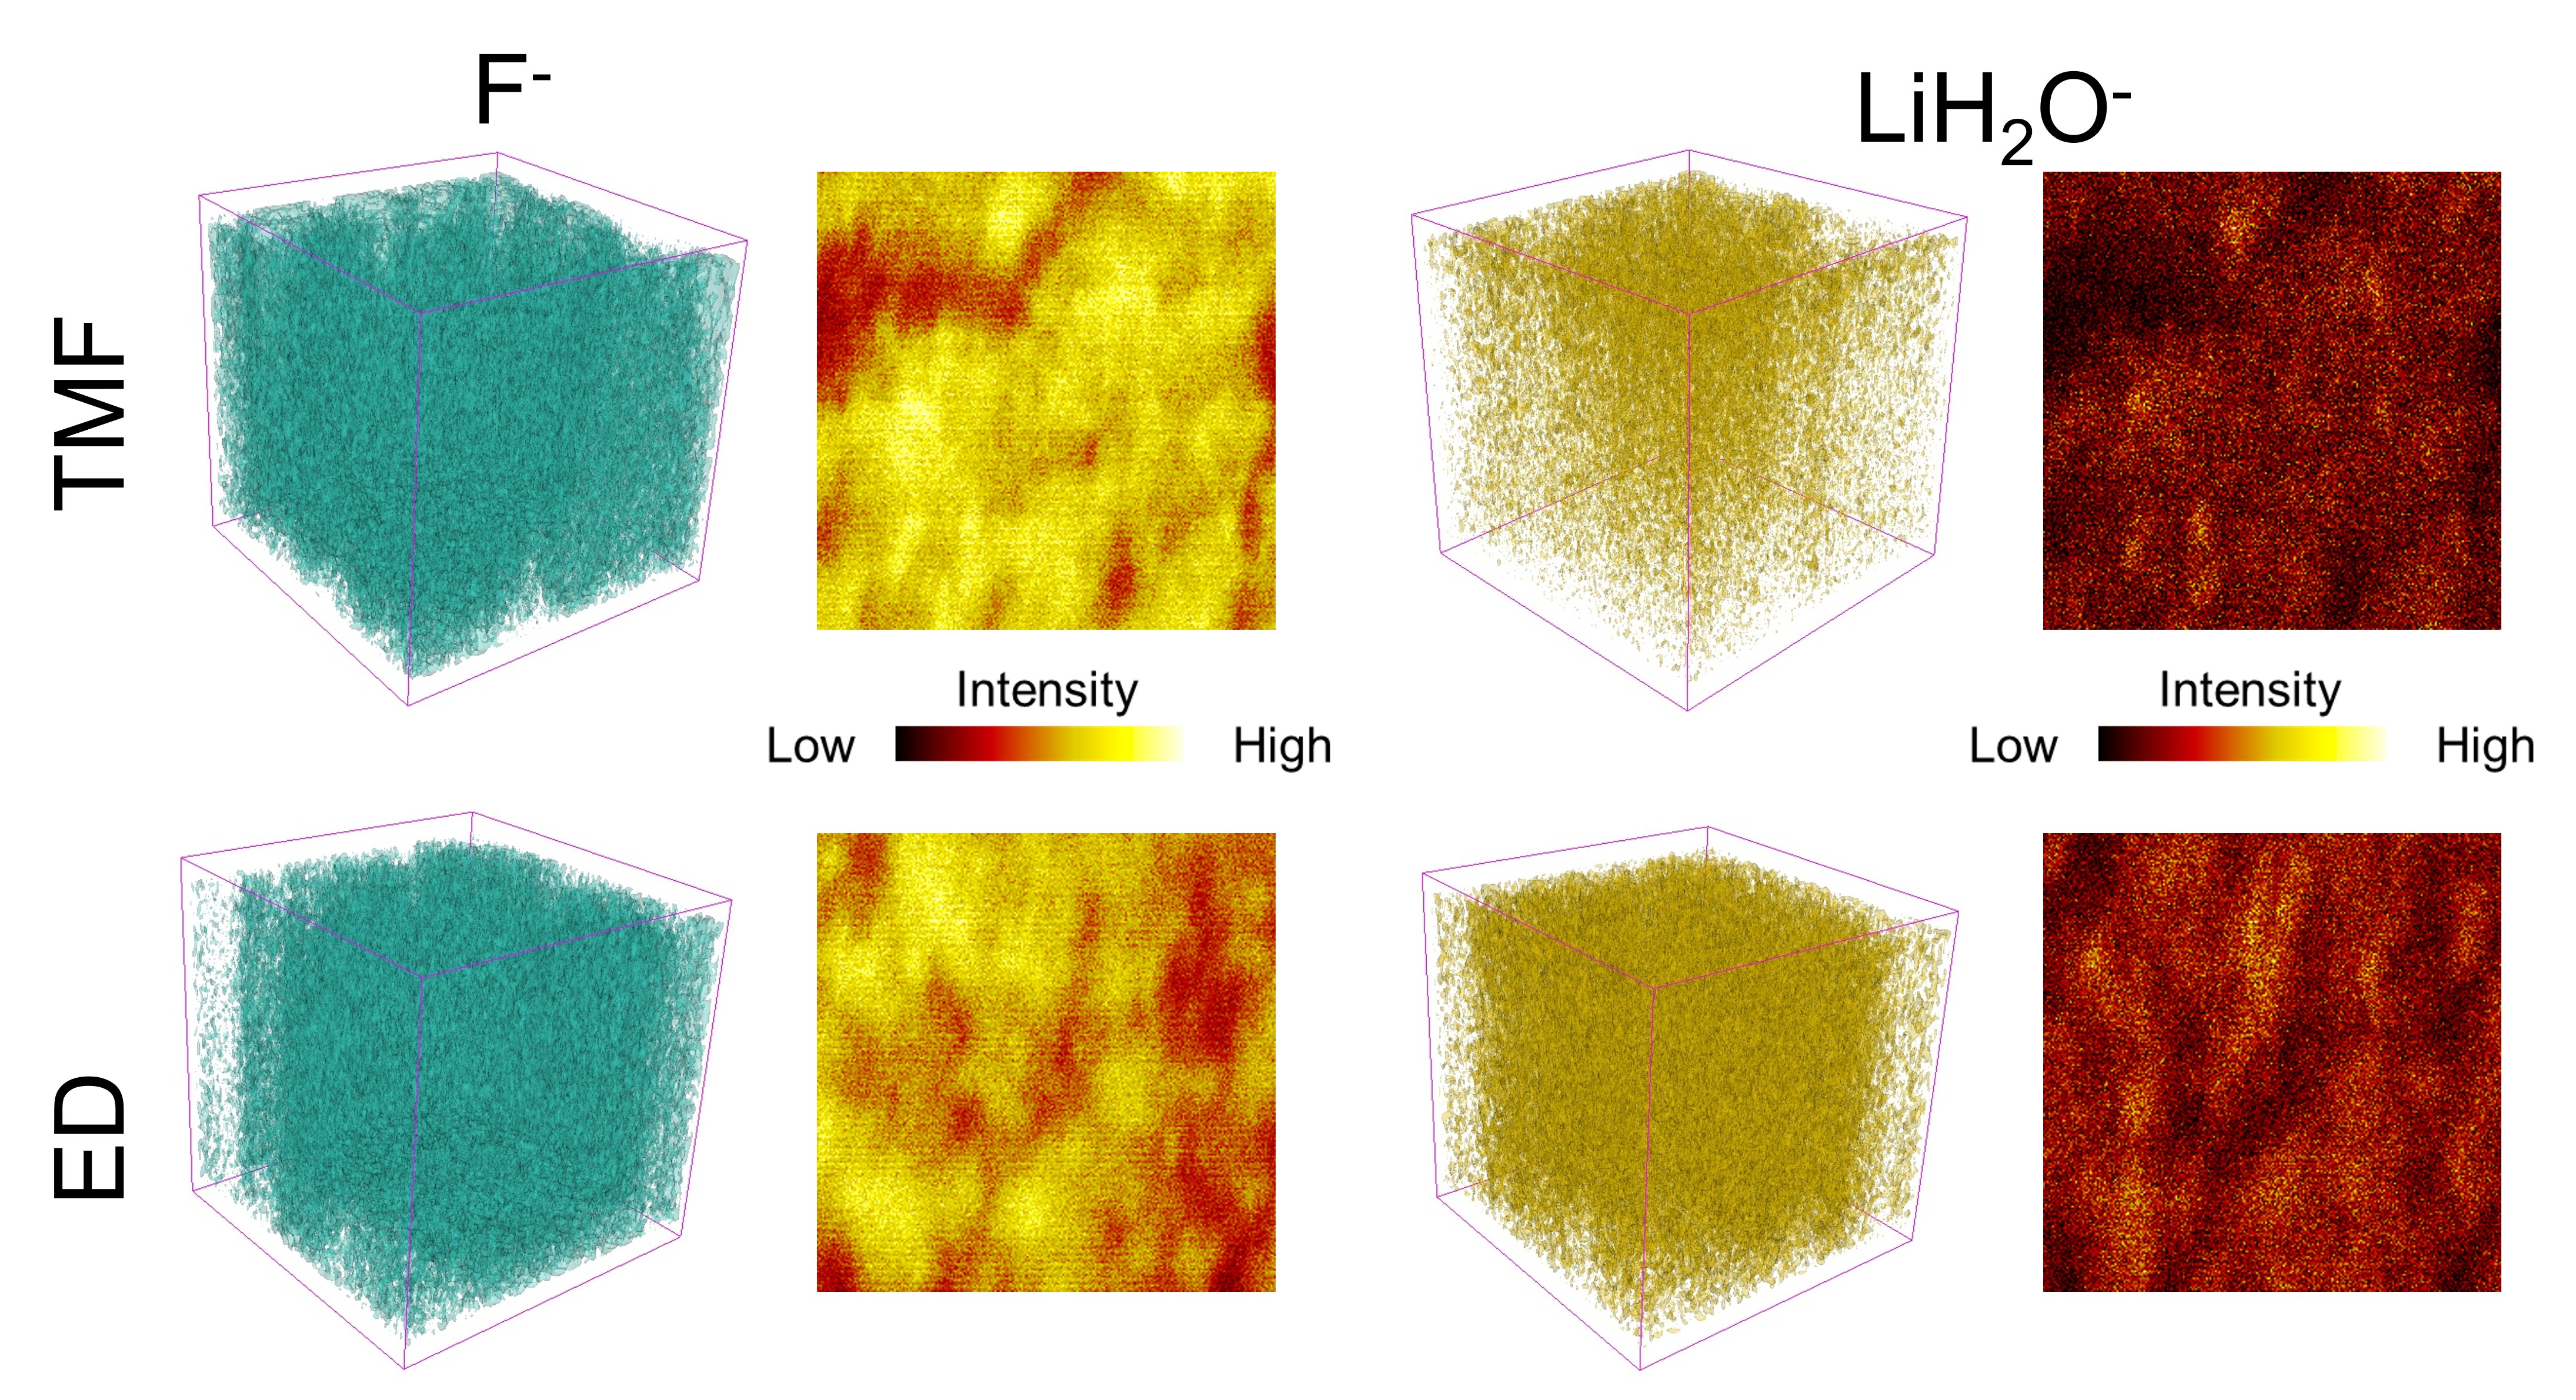


**Supplementary Fig.  36.** 2D images and 3D of various substances within the CEI, based on ToF-SIMS intensity depth profiles, during cycling in different electrolytes.

**Supplementary Table S1.** Comparison of low-temperature NMC||Li cell performance between this work and reported works.

| **No.** | **Cathode** | **Electrolyte** | **Temperature** | **Cut-off voltage** | **Discharge rate** | **Capacity retention** | **Reference** |
| --- | --- | --- | --- | --- | --- | --- | --- |
| 1 | NMC811 | LiFTFSI in BFPE | -40 °C | 4.3 V | 0.1 C | 100 cycles, 92% | [S1] |
| 2 | NMC532 | LiTFSI in DOL | -40 °C | 4.3 V | 0.1 C | 50 cycles, 78% | [S2] |
| 3 | NMC811 | LiPF6 in EMC/FEC/2FB | -30 °C | 4.3 V | 0.2 C | 100 cycles, 76% | [S3] |
| 4 | NMC811 | LiTFSI-LiTFPFB in PC/EC/EMC+LiPO2F2 | -20 °C | 4.3 V | 0.1 C | 50 cycles, 93.7% | [S4] |
| 5 | NMC811 | LiFSI in TFMP/DME | -40 °C | 4.3 V | 0.2 C | 100 cycles, 70% | [S5] |
| 6 | NMC811 | LiClO4 in ES/FEC | -33 °C | 4.3 V | 0.1 C | 100 cycles, 80% | [S6] |
| 7 | NMC811 | LiPF6-LiTFSI-LiNO3 in THF/FEC | -30 °C | 4.3 V | 0.05 C | 200 cycles, 100%  50 cycles,73% | [S7] |
| 8 | NMC811 | LiFSI in BTFE/DME | -40 °C | 4.4V | 0.2C | 2005 cycles,73% | [S8] |
| 9 | NMC811 | LIFSI-LiNO3 in THF | -40 °C | 4.3V | 0.3C | 80 cycles, 68% | [S9] |
| This work | NMC811 | LiPF6 in TEP/MP/FEC+ LiODFB | -20 °C  -40 °C | 4.6 V  4.6 V | 0.5 C  0.1 C | 200 cycles, 93%  200 cycles, 87% | / |

**References**

S1. Xu, J. et al. Revealing the Anion-Solvent Interaction for Ultralow Temperature Lithium Metal Batteries. *Adv. Mater.* **36**, 2306462 (2023).

S2. Jin, C. B. et al. Taming Solvent-Solute Interaction Accelerates Interfacial Kinetics in Low-Temperature Lithium-Metal Batteries. *Adv. Mater.* **35**, 2208340 (2023).

S3. Huang, A. et al. Low-Temperature and Fast-Charging Lithium Metal Batteries Enabled by Solvent−Solvent Interaction Mediated Electrolyte. *Nano Lett.* **24**, 7499 (2024).

S4. Shangguan, X. et al. Additive-Assisted Novel Dual-Salt Electrolyte Addresses Wide Temperature Operation of Lithium-Metal Batteries. *Small* **15**, 1900269 (2019).

S5. Shi, J. et al. An Amphiphilic Molecule-Regulated Core-Shell-Solvation Electrolyte for Li-Metal Batteries at Ultra-Low Temperature. *Angew. Chem. Int. Ed.* **62**, e202218151 (2023).

S6. Wang, Y. et al. Asymmetric Solvents Regulated Crystallization-Limited Electrolytes for All-Climate Lithium Metal Batteries *Angew. Chem. Int. Ed.* **63**, e202310905 (2024).

S7. Liang, P. et al. Competitive Coordination of Ternary Anions Enabling Fast Li-Ion Desolvation for Low-Temperature Lithium Metal Batteries. *Adv. Funct. Mater.* **34**, 2309858 (2024).

S8. Holoubek, J. et al. Electrolyte design implications of ion-pairing in low-temperature Li metal batteries. *Energy Environ. Sci.* **15**, 1647 (2022).

S9. Zhang, W. et al. Engineering a passivating electric double layer for high performance lithium metal batteries. *Nat. Commun*. **2022**, *13*, 2029.
